# Supplementary material for: Perception of microstimulation frequency in human somatosensory cortex
Source: eLife. 2021 Jul 27;10:e65128. doi: 10.7554/eLife.65128 (PMC8376245; doi:10.7554/eLife.65128)
Supplement: Figure 1—figure supplement 1—source data 1. — The ‘Amplitude’ sheet contains data for experiments in which the train duration was 1 s, and the amplitude was varied between 20, 30, 40, 50, 60, 70, and 80 μA. The ‘Duration’ sheet contains data for experiments in which the amplitude of 60 μA and train duration was varied between 0.2, 0.4, 0.6, 0.8, 1, 1.2, 1.5, and 2 s. Each sheet contains information about the electrode number, the value of the varied parameter (amplitude or duration), the participant’s response, and the block for each data point. [file elife-65128-fig1-figsupp1-data1.xlsx]

## Sheet: Amplitude
Electrode #	Amplitude (uA)	Response	Block
48	10	0	1
48	60	3	1
48	20	4	1
48	40	1	1
48	70	2	1
48	30	2	1
48	80	4	1
48	50	3	1
48	10	1	2
48	70	2	2
48	50	1	2
48	80	5	2
48	20	4	2
48	40	2	2
48	30	3	2
48	60	3	2
48	40	3.5	3
48	50	4	3
48	70	5	3
48	20	2	3
48	60	3	3
48	30	1.5	3
48	10	2	3
48	80	3.5	3
48	60	4	4
48	80	4.1	4
48	50	6	4
48	30	3	4
48	70	4	4
48	40	3.5	4
48	20	2.6	4
48	10	0	4
48	60	1	5
48	10	0	5
48	70	2	5
48	30	1	5
48	20	1.5	5
48	50	3	5
48	40	3.2	5
48	80	4	5
48	80	6	6
48	30	2.5	6
48	50	3	6
48	60	4.3	6
48	70	5	6
48	20	3	6
48	10	3	6
48	40	2	6
11	80	6	1
11	40	2	1
11	60	4	1
11	10	1	1
11	50	4	1
11	30	1	1
11	70	7	1
11	20	2	1
11	30	2	2
11	40	3	2
11	80	7	2
11	10	0	2
11	50	3	2
11	70	6	2
11	20	0	2
11	60	5.9	2
11	60	6.5	3
11	10	1	3
11	30	1.2	3
11	80	5.5	3
11	40	2	3
11	20	0	3
11	50	4	3
11	70	5	3
11	40	2	4
11	50	3.5	4
11	80	7	4
11	10	0	4
11	60	3.5	4
11	20	1	4
11	70	6	4
11	30	2	4
11	20	0	5
11	30	1	5
11	60	5.5	5
11	50	4	5
11	10	0	5
11	80	6.2	5
11	40	2	5
11	70	6	5
11	80	6.5	6
11	10	0	6
11	50	3.5	6
11	20	0	6
11	70	4.7	6
11	40	2.5	6
11	30	2	6
11	60	6	6
17	60	0	1
17	50	1	1
17	30	0	1
17	80	2	1
17	20	0	1
17	40	0	1
17	70	2.5	1
17	10	0	1
17	60	1	2
17	70	1	2
17	20	0	2
17	80	1	2
17	40	0.5	2
17	50	1	2
17	30	0	2
17	10	0	2
17	30	0	3
17	20	0	3
17	60	0.5	3
17	80	1	3
17	50	1	3
17	10	0	3
17	70	2	3
17	40	1	3
17	30	0	4
17	80	0.75	4
17	10	0	4
17	40	0	4
17	20	0.25	4
17	60	1	4
17	70	1.1	4
17	50	1	4
17	40	0	5
17	30	0	5
17	70	1	5
17	10	0.9	5
17	50	1.1	5
17	60	0	5
17	80	2	5
17	20	0	5
17	30	0	6
17	60	1	6
17	70	1.8	6
17	10	0	6
17	40	0	6
17	80	0.75	6
17	50	0.5	6
17	20	0	6
41	50	5	1
41	20	6	1
41	30	5	1
41	70	7	1
41	40	4	1
41	80	5.5	1
41	60	6	1
41	10	2	1
41	50	4.5	2
41	60	4	2
41	30	2	2
41	10	1	2
41	20	2	2
41	80	3.5	2
41	70	3	2
41	40	2.5	2
41	50	2	3
41	80	3.5	3
41	10	1	3
41	20	3	3
41	60	3	3
41	40	5	3
41	30	4.7	3
41	70	3.5	3
41	70	3	4
41	40	5	4
41	50	3	4
41	60	3.2	4
41	80	3.7	4
41	10	2	4
41	30	2.5	4
41	20	1.5	4
41	10	2	5
41	40	3	5
41	70	2.5	5
41	60	3	5
41	50	3.2	5
41	20	2	5
41	80	4	5
41	30	3	5
41	40	3.5	6
41	30	3.2	6
41	70	3.7	6
41	80	4	6
41	20	2	6
41	60	4	6
41	50	4	6
41	10	0	6
40	80	1	1
40	30	0.9	1
40	70	0.8	1
40	40	0	1
40	60	1	1
40	20	0	1
40	10	0.5	1
40	50	0.5	1
40	70	0.6	2
40	10	0	2
40	40	0	2
40	60	1	2
40	80	1	2
40	20	0.5	2
40	50	0.5	2
40	30	0	2
40	30	0	3
40	10	0	3
40	60	1	3
40	70	1.1	3
40	40	0.5	3
40	80	1	3
40	50	0.5	3
40	20	0	3
40	40	0.2	4
40	10	0	4
40	70	1	4
40	50	1	4
40	30	0	4
40	80	1	4
40	20	0	4
40	60	0.9	4
40	30	0.5	5
40	20	0	5
40	50	0.7	5
40	70	1	5
40	80	1	5
40	10	0	5
40	40	0.2	5
40	60	1	5
40	80	1	6
40	10	0	6
40	70	0.8	6
40	20	0	6
40	60	0.5	6
40	40	0.5	6
40	30	0.6	6
40	50	0.8	6
19	40	6	1
19	30	2	1
19	80	7	1
19	10	0	1
19	60	4	1
19	20	1	1
19	70	6	1
19	50	5	1
19	10	0	2
19	80	7	2
19	30	3	2
19	20	1	2
19	70	4	2
19	60	5	2
19	40	5	2
19	50	4	2
19	20	1	3
19	10	0	3
19	30	1	3
19	40	3	3
19	70	6	3
19	50	6	3
19	60	7	3
19	80	8	3
19	70	7	4
19	40	5	4
19	50	5	4
19	60	6	4
19	20	1	4
19	10	0	4
19	30	2	4
19	80	7	4
19	30	4	5
19	10	1	5
19	60	5	5
19	50	5	5
19	20	2	5
19	80	7	5
19	70	8	5
19	40	5	5
19	80	6	6
19	20	1	6
19	10	1	6
19	60	4	6
19	70	5	6
19	40	4	6
19	30	3	6
19	50	4	6
34	30	2	1
34	80	4	1
34	60	4	1
34	40	3	1
34	10	1	1
34	20	1	1
34	70	3	1
34	50	4	1
34	40	2	2
34	10	1	2
34	70	5	2
34	20	1	2
34	80	3	2
34	50	3	2
34	60	2	2
34	30	2	2
34	50	1.5	3
34	20	1	3
34	60	4	3
34	40	1	3
34	70	2	3
34	30	2	3
34	80	3	3
34	10	1	3
34	20	1	4
34	60	4	4
34	50	5	4
34	10	0	4
34	80	6	4
34	70	4	4
34	40	2	4
34	30	2	4
34	40	3	5
34	80	6	5
34	20	1	5
34	50	2	5
34	10	1	5
34	70	4	5
34	60	5	5
34	30	5	5
34	70	3	6
34	60	3	6
34	80	2.5	6
34	50	4	6
34	10	0.5	6
34	40	2	6
34	30	1	6
34	20	1	6
11	40	0	1
11	20	0	1
11	10	0	1
11	30	2	1
11	80	5	1
11	50	2	1
11	60	3	1
11	70	4	1
11	50	3	2
11	80	5	2
11	60	4	2
11	70	3	2
11	30	1	2
11	40	2	2
11	10	0	2
11	20	0	2
11	60	2	3
11	50	3	3
11	20	1	3
11	40	2	3
11	30	1	3
11	10	0	3
11	70	4	3
11	80	3	3
11	80	5	4
11	20	1	4
11	10	0	4
11	70	3	4
11	50	1	4
11	40	1.5	4
11	30	1	4
11	60	3	4
11	60	3	5
11	10	0	5
11	50	3	5
11	80	6	5
11	30	1	5
11	40	0.5	5
11	70	2	5
11	20	0	5
11	60	1	6
11	70	2	6
11	10	0	6
11	40	1	6
11	80	3	6
11	20	1	6
11	50	2	6
11	30	1	6
13	70	0	1
13	20	0	1
13	40	1	1
13	50	0	1
13	60	1	1
13	80	2	1
13	30	0	1
13	10	0	1
13	70	1	2
13	60	1	2
13	10	0	2
13	20	1	2
13	80	2	2
13	40	1.5	2
13	30	1.5	2
13	50	0.5	2
13	60	1	3
13	70	1.5	3
13	50	2	3
13	40	1	3
13	10	0	3
13	30	0.5	3
13	20	0	3
13	80	2.5	3
13	40	1	4
13	10	0	4
13	30	0	4
13	60	0.5	4
13	20	0.5	4
13	80	0	4
13	70	2	4
13	50	2	4
13	40	2.5	5
13	50	0.5	5
13	30	1	5
13	20	0	5
13	10	0.5	5
13	70	1.5	5
13	80	2	5
13	60	2	5
13	20	0	6
13	30	0.5	6
13	40	0.5	6
13	50	1	6
13	80	1	6
13	60	1	6
13	10	0	6
13	70	2	6
41	50	1	1
41	40	0	1
41	20	0.5	1
41	80	2	1
41	30	1	1
41	10	0	1
41	70	2.5	1
41	60	2	1
41	80	3	2
41	70	2	2
41	50	1	2
41	40	0.5	2
41	30	0.5	2
41	60	1	2
41	10	0	2
41	20	0.25	2
41	30	0.25	3
41	70	0.5	3
41	10	0	3
41	20	0	3
41	60	1	3
41	80	1.5	3
41	40	1	3
41	50	1	3
41	60	0.5	4
41	30	0	4
41	80	2.5	4
41	50	1.5	4
41	40	1	4
41	10	0	4
41	20	0.25	4
41	70	2	4
41	10	0	5
41	60	1	5
41	20	0.5	5
41	40	0	5
41	70	1	5
41	30	0.5	5
41	50	2	5
41	80	2	5
41	10	0.5	6
41	20	0	6
41	70	2	6
41	60	1	6
41	30	1	6
41	40	1	6
41	80	1	6
41	50	0.5	6
34	20	1	1
34	80	4	1
34	70	3	1
34	10	3	1
34	50	2	1
34	30	2	1
34	60	1	1
34	40	0.5	1
34	70	2	2
34	50	2	2
34	30	0.5	2
34	20	2	2
34	60	3	2
34	40	1	2
34	10	2	2
34	80	4	2
34	10	1	3
34	70	2	3
34	60	1	3
34	40	0.5	3
34	50	1	3
34	80	1.5	3
34	20	0.5	3
34	30	0.5	3
34	40	2	4
34	70	1	4
34	60	3	4
34	10	1.5	4
34	50	1.5	4
34	20	1	4
34	80	3	4
34	30	2	4
34	60	1	5
34	40	1	5
34	20	3	5
34	50	4	5
34	70	3.5	5
34	80	4	5
34	10	2	5
34	30	1	5
34	60	2	6
34	20	1	6
34	10	1	6
34	40	1.5	6
34	50	3	6
34	70	4	6
34	80	4.5	6
34	30	2.5	6
19	60	1	1
19	60	3	1
19	60	2	1
19	60	0.5	1
19	60	1	1
19	60	3	1
19	60	0.25	1
19	60	2	1
19	60	2.5	1
19	60	1	2
19	60	2.5	2
19	60	2	2
19	60	3	2
19	60	1	2
19	60	3	2
19	60	3	2
19	60	0.25	2
19	60	2	2
19	60	1	3
19	60	0.25	3
19	60	1.5	3
19	60	1.5	3
19	60	2	3
19	60	2	3
19	60	2	3
19	60	2	3
19	60	2.5	3
19	60	2	4
19	60	1.5	4
19	60	2	4
19	60	0.25	4
19	60	2.5	4
19	60	2.5	4
19	60	3	4
19	60	1	4
19	60	2	4
19	60	2.5	5
19	60	3	5
19	60	2.5	5
19	60	1	5
19	60	2	5
19	60	2.5	5
19	60	0.5	5
19	60	1	5
19	60	1	5
19	60	2.5	6
19	60	2	6
19	60	2	6
19	60	2	6
19	60	2.5	6
19	60	3	6
19	60	1	6
19	60	0.25	6
19	60	2	6
19	80	3	1
19	40	2.5	1
19	70	3	1
19	50	3	1
19	30	1	1
19	20	1	1
19	60	2	1
19	80	2.5	2
19	50	2.5	2
19	60	2	2
19	40	1	2
19	70	1	2
19	30	0.5	2
19	20	0.5	2
19	40	1	3
19	20	0.5	3
19	80	2.5	3
19	70	3	3
19	50	2	3
19	30	1	3
19	60	2	3
19	20	0	4
19	40	1	4
19	30	0.5	4
19	70	2.5	4
19	50	3	4
19	60	3.5	4
19	80	3.5	4
19	50	2	5
19	30	2	5
19	70	2	5
19	20	0.5	5
19	60	2	5
19	40	1	5
19	80	2	5
19	50	1.5	6
19	30	1	6
19	40	2	6
19	60	2.5	6
19	70	2.5	6
19	80	3	6
19	20	0.5	6
2	60	1	1
2	40	1	1
2	30	1	1
2	20	0.25	1
2	70	2	1
2	50	1.5	1
2	80	2	1
2	80	2	2
2	20	0	2
2	40	0.25	2
2	70	1	2
2	30	0.25	2
2	50	0.5	2
2	60	1	2
2	20	0	3
2	70	1	3
2	80	1	3
2	60	1.5	3
2	40	1.5	3
2	50	1	3
2	30	1	3
2	60	1.5	4
2	30	0.25	4
2	80	2	4
2	40	1	4
2	70	1.5	4
2	50	1	4
2	20	0.25	4
2	80	2	5
2	60	1.5	5
2	20	0	5
2	40	1	5
2	50	1	5
2	70	2	5
2	30	1.5	5
2	80	2	6
2	70	2	6
2	20	0.25	6
2	40	1.5	6
2	30	1.5	6
2	60	1.5	6
2	50	1	6
2	60	1	1
2	60	1	1
2	60	1	1
2	60	0.5	1
2	60	0.5	1
2	60	0.5	1
2	60	0	1
2	60	0	1
2	60	0.5	1
2	60	0.5	2
2	60	0.5	2
2	60	1	2
2	60	1	2
2	60	1	2
2	60	1	2
2	60	0	2
2	60	1	2
2	60	1	2
2	60	1	3
2	60	0	3
2	60	1.25	3
2	60	1	3
2	60	0.5	3
2	60	0.5	3
2	60	1	3
2	60	1.25	3
2	60	1.25	3
2	60	1.25	4
2	60	1	4
2	60	1	4
2	60	0.5	4
2	60	0.5	4
2	60	1.25	4
2	60	1.25	4
2	60	0	4
2	60	0.5	4
2	60	1	5
2	60	1.25	5
2	60	0	5
2	60	0.5	5
2	60	1	5
2	60	1.25	5
2	60	1.5	5
2	60	1.25	5
2	60	1	5
2	60	1.5	6
2	60	1.5	6
2	60	1.25	6
2	60	0.5	6
2	60	1	6
2	60	1	6
2	60	1.25	6
2	60	0	6
2	60	0.5	6

## Sheet: Duration
Electrode #	Duration (s)	Response	Block
19	0.3	1	1
19	2	3	1
19	0.75	2	1
19	0.2	0.5	1
19	0.5	1	1
19	1.5	3	1
19	0.1	0.25	1
19	0.4	2	1
19	1	2.5	1
19	0.2	1	2
19	1.5	2.5	2
19	0.3	2	2
19	2	3	2
19	0.4	1	2
19	0.75	3	2
19	0.5	3	2
19	0.1	0.25	2
19	1	2	2
19	0.2	1	3
19	0.1	0.25	3
19	0.75	1.5	3
19	0.3	1.5	3
19	0.4	2	3
19	2	2	3
19	0.5	2	3
19	1	2	3
19	1.5	2.5	3
19	0.4	2	4
19	0.3	1.5	4
19	0.5	2	4
19	0.1	0.25	4
19	2	2.5	4
19	1	2.5	4
19	1.5	3	4
19	0.2	1	4
19	0.75	2	4
19	1	2.5	5
19	2	3	5
19	0.5	2.5	5
19	0.2	1	5
19	0.75	2	5
19	1.5	2.5	5
19	0.1	0.5	5
19	0.4	1	5
19	0.3	1	5
19	2	2.5	6
19	1	2	6
19	0.3	2	6
19	0.5	2	6
19	0.4	2.5	6
19	1.5	3	6
19	0.2	1	6
19	0.1	0.25	6
19	0.75	2	6
19	1	3	1
19	1	2.5	1
19	1	3	1
19	1	3	1
19	1	1	1
19	1	1	1
19	1	2	1
19	1	2.5	2
19	1	2.5	2
19	1	2	2
19	1	1	2
19	1	1	2
19	1	0.5	2
19	1	0.5	2
19	1	1	3
19	1	0.5	3
19	1	2.5	3
19	1	3	3
19	1	2	3
19	1	1	3
19	1	2	3
19	1	0	4
19	1	1	4
19	1	0.5	4
19	1	2.5	4
19	1	3	4
19	1	3.5	4
19	1	3.5	4
19	1	2	5
19	1	2	5
19	1	2	5
19	1	0.5	5
19	1	2	5
19	1	1	5
19	1	2	5
19	1	1.5	6
19	1	1	6
19	1	2	6
19	1	2.5	6
19	1	2.5	6
19	1	3	6
19	1	0.5	6
2	1	1	1
2	1	1	1
2	1	1	1
2	1	0.25	1
2	1	2	1
2	1	1.5	1
2	1	2	1
2	1	2	2
2	1	0	2
2	1	0.25	2
2	1	1	2
2	1	0.25	2
2	1	0.5	2
2	1	1	2
2	1	0	3
2	1	1	3
2	1	1	3
2	1	1.5	3
2	1	1.5	3
2	1	1	3
2	1	1	3
2	1	1.5	4
2	1	0.25	4
2	1	2	4
2	1	1	4
2	1	1.5	4
2	1	1	4
2	1	0.25	4
2	1	2	5
2	1	1.5	5
2	1	0	5
2	1	1	5
2	1	1	5
2	1	2	5
2	1	1.5	5
2	1	2	6
2	1	2	6
2	1	0.25	6
2	1	1.5	6
2	1	1.5	6
2	1	1.5	6
2	1	1	6
2	2	1	1
2	1.5	1	1
2	0.5	1	1
2	0.4	0.5	1
2	0.75	0.5	1
2	0.3	0.5	1
2	0.2	0	1
2	0.1	0	1
2	1	0.5	1
2	0.2	0.5	2
2	0.4	0.5	2
2	0.5	1	2
2	1.5	1	2
2	2	1	2
2	0.3	1	2
2	0.1	0	2
2	1	1	2
2	0.75	1	2
2	1.5	1	3
2	0.1	0	3
2	0.5	1.25	3
2	2	1	3
2	0.3	0.5	3
2	0.2	0.5	3
2	0.4	1	3
2	1	1.25	3
2	0.75	1.25	3
2	0.4	1.25	4
2	1	1	4
2	2	1	4
2	0.2	0.5	4
2	1.5	0.5	4
2	0.75	1.25	4
2	0.5	1.25	4
2	0.1	0	4
2	0.3	0.5	4
2	0.4	1	5
2	1	1.25	5
2	0.1	0	5
2	0.2	0.5	5
2	0.5	1	5
2	0.75	1.25	5
2	1.5	1.5	5
2	2	1.25	5
2	0.3	1	5
2	2	1.5	6
2	0.5	1.5	6
2	1.5	1.25	6
2	0.2	0.5	6
2	1	1	6
2	0.3	1	6
2	0.75	1.25	6
2	0.1	0	6
2	0.4	0.5	6
54	1.5	1	1
54	0.75	1	1
54	0.3	0.5	1
54	2	0.55	1
54	0.2	0.3	1
54	0.5	0.8	1
54	1	0.7	1
54	0.4	0.4	1
54	0.1	0.3	1
54	0.3	0.3	2
54	0.5	0.7	2
54	0.4	0.65	2
54	1	0.9	2
54	0.75	1	2
54	2	0.5	2
54	1.5	0.6	2
54	0.2	0.4	2
54	0.1	0.1	2
54	0.3	0.9	3
54	0.5	0.9	3
54	0.75	1	3
54	0.4	1.1	3
54	2	0.8	3
54	1	0.6	3
54	0.1	0.05	3
54	1.5	0.9	3
54	0.2	0.15	3
54	0.1	0.09	4
54	1	0.8	4
54	0.4	1	4
54	0.2	0.9	4
54	0.3	0.9	4
54	0.5	1	4
54	1.5	1.1	4
54	2	0.7	4
54	0.75	1	4
54	0.2	0.2	5
54	0.4	0.4	5
54	1.5	0.6	5
54	0.1	0.05	5
54	1	0.3	5
54	0.75	1.1	5
54	0.3	1.1	5
54	2	1.2	5
54	0.5	1.1	5
54	1	1	6
54	0.2	0.7	6
54	0.75	1	6
54	2	1.1	6
54	0.3	1.1	6
54	0.5	1	6
54	0.1	0.09	6
54	0.4	0.7	6
54	1.5	0.8	6
22	0.3	0.7	1
22	1	0.9	1
22	0.1	0.4	1
22	1.5	1.1	1
22	0.5	1.2	1
22	2	1	1
22	0.4	0.9	1
22	0.75	0.8	1
22	0.2	0.2	1
22	0.75	0.5	2
22	0.2	0.4	2
22	0.1	0.1	2
22	2	0.8	2
22	0.3	0.85	2
22	1	0.85	2
22	0.4	0.8	2
22	1.5	0.75	2
22	0.5	0.75	2
22	0.1	0.1	3
22	0.2	0.15	3
22	0.3	0.2	3
22	0.75	0.3	3
22	0.5	0.4	3
22	1	0.6	3
22	2	0.8	3
22	1.5	0.85	3
22	0.4	0.7	3
22	2	1	4
22	1	1	4
22	0.4	1.1	4
22	1.5	1.3	4
22	0.3	1.2	4
22	0.1	0.08	4
22	0.2	0.3	4
22	0.5	0.9	4
22	0.75	1	4
22	0.4	0.7	5
22	0.5	1	5
22	0.3	0.8	5
22	2	1.1	5
22	1	1	5
22	1.5	1.1	5
22	0.1	0.08	5
22	0.2	0.1	5
22	0.75	0.8	5
22	0.4	0.75	6
22	0.2	0.4	6
22	0.1	0.08	6
22	2	1.1	6
22	1.5	1.15	6
22	0.5	0.8	6
22	1	1.15	6
22	0.3	0.9	6
22	0.75	1.2	6
