# Supplementary material for: Perception of microstimulation frequency in human somatosensory cortex
Source: eLife. 2021 Jul 27;10:e65128. doi: 10.7554/eLife.65128 (PMC8376245; doi:10.7554/eLife.65128)
Supplement: Figure 1—figure supplement 2—source data 1. — Each sheet contains data for one of the three frequency preference groups (LFP, IFP, or HFP). Each sheet contains information about the electrode number, stimulation frequency, mean response magnitude, and the standard error of the response magnitude. The individual trial data to create these means and standard error values can be found in Figure 1—source data 1. [file elife-65128-fig1-figsupp2-data1.xlsx]

## Sheet: LFP
Electrode #	Frequency (Hz)	Mean Intensity	Standard Error
2	20	1.7	0.258199
2	40	2.1	0.296808
2	60	1.83333	0.23074
2	80	1.65	0.177616
2	100	1.46667	0.180571
2	150	1.36667	0.19382
2	200	1.45	0.164268
2	250	1.31667	0.195349
2	300	1.06667	0.187577
12	20	1.43	0.267011
12	40	1.66667	0.285013
12	60	1.53	0.225934
12	80	1.395	0.196587
12	100	1.35333	0.227469
12	150	1.33333	0.212192
12	200	1.16	0.178671
12	250	1.08833	0.203404
12	300	1.155	0.192351
42	20	1.2	0.116667
42	40	1.25	0.111803
42	60	1.05	0.138444
42	80	0.875	0.154785
42	100	0.825	0.144578
42	150	0.485	0.11644
42	200	0.395001	0.112903
42	250	0.285001	0.0537736
42	300	0.235004	0.0997347
49	20	1.5	0.1066
49	40	1.6	0.06742
49	60	1.55	0.0825723
49	80	1.6	0.06742
49	100	1.3	0.13484
49	150	1.05	0.0825723
49	200	1	0
49	250	1	0.1066
49	300	0.9	0.126131
63	20	1.25	0.139087
63	40	1.38333	0.136022
63	60	1.4	0.141211
63	80	1.56667	0.137653
63	100	1.17667	0.125103
63	150	1.23333	0.110689
63	200	1.1	0.143821
63	250	1.14333	0.106747
63	300	1.11667	0.0899184

## Sheet: IFP
Electrode #	Frequency (Hz)	Mean Intensity	Standard Error
14	20	2.025	0.401483
14	40	2.75	0.366414
14	60	2.6	0.358323
14	80	2.55	0.339753
14	100	2.525	0.389781
14	150	2.35	0.31476
14	200	2.125	0.340773
14	250	1.875	0.252304
14	300	2.05	0.308821
16	20	1.15	0.217307
16	40	2	0.166667
16	60	1.75	0.220479
16	80	1.4	0.139443
16	100	1.85	0.111803
16	150	1.6	0.139443
16	200	1.5	0.166667
16	250	1.5	0.235702
16	300	1.8	0.190029
19	20	1.5	0.253448
19	40	2.486	0.306697
19	60	2.496	0.326028
19	80	2.388	0.304719
19	100	2.27	0.242861
19	150	2.174	0.241433
19	200	2.044	0.230605
19	250	2	0.226946
19	300	2.018	0.208992
22	20	1.044	0.216844
22	40	1.586	0.21276
22	60	1.732	0.246639
22	80	1.666	0.19654
22	100	1.66	0.210819
22	150	1.538	0.201285
22	200	1.558	0.226061
22	250	1.506	0.16917
22	300	1.558	0.20314
26	20	1.3	0.0912871
26	40	2.2	0.136931
26	60	2	0.166667
26	80	2	0.166667
26	100	1.85	0.191848
26	150	1.95	0.0912871
26	200	1.9	0.0950146
26	250	1.95	0.0912871
26	300	2.1	0.0456435
54	20	2.4	0.151383
54	40	2.9	0.139443
54	60	2.7	0.302765
54	80	2.4	0.139443
54	100	2	0.204124
54	150	1.25	0.144338
54	200	1.65	0.182574
54	250	1.3	0.149071
54	300	1.7	0.223607
58	20	2	0.204124
58	40	2.75	0.0833333
58	60	2.6	0.182574
58	80	2.6	0.139443
58	100	2.45	0.190029
58	150	2.45	0.0912871
58	200	2.2	0.149071
58	250	2.1	0.139443
58	300	2.15	0.162447

## Sheet: HFP
Electrode #	Frequency (Hz)	Mean Intensity	Standard error
3	20	0.255001	0.0646965
3	40	0.414167	0.0902708
3	60	0.455833	0.0994628
3	80	0.461667	0.0859248
3	100	0.561667	0.100508
3	150	0.588333	0.0948042
3	200	0.588333	0.094944
3	250	0.604167	0.107202
3	300	0.653333	0.109855
8	20	0.050008	0.0298795
8	40	0.350002	0.10133
8	60	0.120004	0.0335397
8	80	0.200004	0.0559004
8	100	0.5	0.0818317
8	150	0.450004	0.119522
8	200	0.450002	0.0991023
8	250	0.4	0.0896421
8	300	0.500002	0.0944902
13	20	1e-05	0
13	40	0.060004	0.0141407
13	60	0.030004	0.00706965
13	80	0.08	0.00707107
13	100	0.050002	0.0091278
13	150	0.11	0.0212132
13	200	0.12	0.0216025
13	250	0.14	0.0321455
13	300	0.16	0.0279881
20	20	0.16	0.0205396
20	40	0.27	0.0360122
20	60	0.43	0.0273861
20	80	0.74	0.0408886
20	100	0.52	0.0455865
20	150	0.55	0.0522913
20	200	0.56	0.065192
20	250	0.63	0.0609816
20	300	0.500002	0.0765455
34	20	0.060004	0.0132829
34	40	0.14	0.0158114
34	60	0.19	0.0199263
34	80	0.12	0.0183912
34	100	0.12	0.0183912
34	150	0.22	0.0162698
34	200	0.23	0.0108465
34	250	0.25	0
34	300	0.22	0.0162698
36	20	0.080006	0.0262758
36	40	0.333334	0.0632558
36	60	0.51	0.0851236
36	80	0.416667	0.0616675
36	100	0.496667	0.0632246
36	150	0.766667	0.0648054
36	200	0.816667	0.100757
36	250	0.773333	0.102824
36	300	0.816667	0.0875897
41	20	1e-05	0
41	40	0.110002	0.0205189
41	60	0.140002	0.0248673
41	80	0.22	0.0153897
41	100	0.24	0.0375219
41	150	0.19	0.0188484
41	200	0.3	0.0256495
41	250	0.19	0.0188484
41	300	0.32	0.0402296
45	20	0.020008	0.009999
45	40	0.050008	0.024999
45	60	0.070006	0.0244938
45	80	0.080002	0.009999
45	100	0.080002	0.009999
45	150	0.13	0.015
45	200	0.16	0.0183712
45	250	0.22	0.015
45	300	0.19	0.0183712
