# Supplementary material for: Perception of microstimulation frequency in human somatosensory cortex
Source: eLife. 2021 Jul 27;10:e65128. doi: 10.7554/eLife.65128 (PMC8376245; doi:10.7554/eLife.65128)
Supplement: Figure 1—figure supplement 3—source data 1. — Each sheet contains data for a different electrode. Each sheet contains information about the post-implant day, stimulation frequency, normalized median value of the participant’s response, and the standard error of the reported responses. The individual trial data to create these means and standard error values can be found in Figure 1—source data 1. [file elife-65128-fig1-figsupp3-data1.xlsx]

## Sheet: Electrode 19
Post-implant day	Frequency (Hz)	Normalized Median Response	Standard Error
813	20	0.833333	0.0666667
813	40	1.33333	0.0816497
813	60	1.33333	0.0527046
813	80	1.33333	0.0849837
813	100	1	0.110554
813	150	1	0.110554
813	200	1	0.0666667
813	250	1	0.062361
813	300	1	0.0408248
815	20	0.9	0.0447214
815	40	1.1	0.0583095
815	60	1.2	0
815	80	1.2	0.08
815	100	1.2	0.04
815	150	1	0.0547723
815	200	1	0.0489898
815	250	1	0.0632456
815	300	1	0.0663325
913	20	0.5	0.05
913	40	1.25	0.111803
913	60	0.75	0.1
913	80	1	0.0790569
913	100	1	0.0935414
913	150	1	0.05
913	200	1	0.145774
913	250	0.75	0.122474
913	300	1	0.111803
960	20	0.5	0.0408248
960	40	1	0.0408248
960	60	1	0.062361
960	80	1.06667	0.0581187
960	100	1.16667	0.062361
960	150	1.06667	0.0834
960	200	1.16667	0.0563718
960	250	1	0.0333333
960	300	1	0.0922557
976	20	0.666667	0.0666667
976	40	1.16667	0.116237
976	60	1.33333	0.172434
976	80	1.16667	0.190029
976	100	1	0.0849837
976	150	1	0.0912871
976	200	0.833333	0.0333333
976	250	1	0.0333333
976	300	1	0.112744

## Sheet: Electrode 22
Post-implant day	Frequency (Hz)	Normalized Median Response	Standard Error
813	20	0.8	0.16
813	40	1	0.0894427
813	60	1.1	0.134164
813	80	1	0.0894427
813	100	1	0.0748331
813	150	0.8	0.12
813	200	0.8	0.126491
813	250	1	0.0489898
813	300	1	0.10198
913	20	0.571429	0.114286
913	40	1.14286	0.0699854
913	60	1.14286	0.0947607
913	80	1	0.0832993
913	100	1.14286	0.15253
913	150	0.857143	0.156492
913	200	1	0.142857
913	250	0.857143	0.106904
913	300	1.14286	0.114286
960	20	0.5	0.0912871
960	40	1.06667	0.0840635
960	60	1.16667	0.0646357
960	80	1.16667	0.0827312
960	100	1.06667	0.0459468
960	150	0.833333	0.0666667
960	200	1	0.0849837
960	250	1	0.0394405
960	300	1	0.0816497
974	20	0.625	0.125693
974	40	1	0.0482327
974	60	1.04167	0.103246
974	80	1	0.0935414
974	100	1.04167	0.0437004
974	150	1	0.035843
974	200	1	0.0448764
974	250	1	0.0333333
974	300	0.958333	0.0618017
1029	20	0.727273	0.129844
1029	40	1	0.139805
1029	60	1	0.105235
1029	80	0.909091	0.0616575
1029	100	1.09091	0.0825723
1029	150	0.909091	0.0642824
1029	200	1	0.1
1029	250	0.909091	0.0603023
1029	300	1	0.0616575

## Sheet: Electrode 2
Post-implant day	Frequency (Hz)	Normalized Median Response	Standard Error
813	20	1.33333	0.163299
813	40	2	0.133333
813	60	1.33333	0.221108
813	80	1.33333	0.169967
813	100	1	0.124722
813	150	0.666667	0.133333
813	200	1	0.0816497
813	250	0.666667	0.133333
813	300	0.666667	0.0666667
815	20	1.125	0.178536
815	40	1.5	0.122474
815	60	1	0.127475
815	80	1	0.122474
815	100	1	0.127475
815	150	1	0.127475
815	200	1	0.0829156
815	250	1	0.127475
815	300	1	0.1
913	20	1	0.145774
913	40	1	0
913	60	1.25	0.0935414
913	80	1.25	0.111803
913	100	1	0.136931
913	150	1	0.223607
913	200	1	0.169558
913	250	1	0.15
913	300	0.5	0.1

## Sheet: Electrode 12
Post-implant day	Frequency (Hz)	Normalized Median Response	Standard Error
813	20	1.25	0.0612372
813	40	1.5	0.0935414
813	60	1	0.1
813	80	1	0.05
813	100	1	0.165831
813	150	1	0.145774
813	200	0.75	0.0935414
813	250	0.75	0.127475
813	300	0.75	0.127475
815	20	1	0.134629
815	40	1.25	0.0612372
815	60	1	0.0612372
815	80	1	0.127475
815	100	1	0.0790569
815	150	1	0.1
815	200	0.75	0.0935414
815	250	1	0.127475
815	300	1	0.0612372
913	20	1	0.0612372
913	40	1.25	0.0935414
913	60	1.25	0.111803
913	80	1.25	0.0935414
913	100	1.5	0.158114
913	150	1.25	0.111803
913	200	0.75	0.1
913	250	0.75	0.145774
913	300	1	0.0935414
960	20	1	0.110554
960	40	1.16667	0.0563718
960	60	1.16667	0.0849837
960	80	1.16667	0.062361
960	100	0.833333	0.0816497
960	150	1	0.0816497
960	200	1	0.062361
960	250	0.833333	0.122474
960	300	0.666667	0.0816497
974	20	0.75	0.183712
974	40	1.125	0.151038
974	60	1.25	0.0847791
974	80	1	0.215058
974	100	0.875	0.114564
974	150	0.875	0.104583
974	200	1	0.127475
974	250	0.75	0.108972
974	300	0.75	0.05
1029	20	1	0.0790569
1029	40	1.25	0.0790569
1029	60	1.25	0.0935414
1029	80	1.25	0.0790569
1029	100	1.25	0.0784219
1029	150	1.25	0.187083
1029	200	1	0.05
1029	250	0.75	0.0612372
1029	300	1	0.0935414

## Sheet: Electrode 63
Post-implant day	Frequency (Hz)	Normalized Median Response	Standard Error
826	20	1.14286	0.110657
826	40	1.14286	0.0285714
826	60	1.14286	0.0699854
826	80	1.14286	0.0903508
826	100	0.571429	0.12454
826	150	0.857143	0.0903508
826	200	0.857143	0.0903508
826	250	0.857143	0.106904
826	300	0.857143	0.0857143
889	20	1	0.127475
889	40	1	0.0612372
889	60	1	0.145774
889	80	1.25	0.169558
889	100	1	0.163248
889	150	1	0.176777
889	200	0.5	0.183712
889	250	1	0.104403
889	300	1	0.1
896	20	1	0.1
896	40	1.25	0.0935414
896	60	1	0.122474
896	80	1.5	0.0612372
896	100	1.5	0.2
896	150	1	0.122474
896	200	1	0.187083
896	250	1	0.158114
896	300	1	0.1

## Sheet: Electrode 3
Post-implant day	Frequency (Hz)	Normalized Median Response	Standard Error
826	20	1.25	0.0612372
826	40	1.5	0.0935414
826	60	1	0.1
826	80	1	0.05
826	100	1	0.165831
826	150	1	0.145774
826	200	0.75	0.0935414
826	250	0.75	0.127475
826	300	0.75	0.127475
889	20	0.333333	0.133333
889	40	1	0.133333
889	60	1.33333	0.169967
889	80	1.33333	0.163299
889	100	1.33333	0.182574
889	150	1	0.169967
889	200	1	0.2
889	250	1	0.309121
889	300	1.33333	0.2
896	20	0.2	0.269072
896	40	1	0.244949
896	60	1	0.273861
896	80	1	0.291548
896	100	1	0.254951
896	150	2	0.367423
896	200	1	0.339116
896	250	1	0.244949
896	300	1.5	0.187083
913	20	0	0.0489898
913	40	0.5	0.320312
913	60	0.5	0.18
913	80	0.5	0.122474
913	100	1	0.187083
913	150	1	0.302324
913	200	1	0.158114
913	250	1	0.339116
913	300	1	0.244949
960	20	1	0.242384
960	40	0.5	0.0612372
960	60	0.5	0.183712
960	80	1	0.165831
960	100	1	0.291548
960	150	1	0.291548
960	200	1.5	0.187083
960	250	1	0.254951
960	300	1.25	0.145774
976	20	0.5	0.235186
976	40	0.75	0.156125
976	60	1	0.280624
976	80	1	0.280624
976	100	1	0.433013
976	150	1.5	0.229129
976	200	1.5	0.353553
976	250	1	0.45
976	300	0.75	0.35

## Sheet: Electrode 36
Post-implant day	Frequency (Hz)	Normalized Median Response	Standard Error
813	20	0.5	0.1
813	40	0.5	0.203961
813	60	1	0.339116
813	80	0.5	0.316228
813	100	1	0.254951
813	150	1	0.244949
813	200	2	0.316228
813	250	1.5	0.34
813	300	1	0.387298
815	20	0	0
815	40	0.5	0.1
815	60	0.75	0.111803
815	80	0.5	0.122474
815	100	0.5	0.0612372
815	150	1	0
815	200	1	0.1
815	250	1	0.122474
815	300	1	0.1
913	20	0	0.0979796
913	40	0.4	0.12
913	60	0.4	0.32
913	80	1	0.2
913	100	1	0.479166
913	150	2	0.509902
913	200	2	0.4
913	250	1	0.489898
913	300	2	0.509902
