# Supplementary material for: Perception of microstimulation frequency in human somatosensory cortex
Source: eLife. 2021 Jul 27;10:e65128. doi: 10.7554/eLife.65128 (PMC8376245; doi:10.7554/eLife.65128)
Supplement: Figure 1—figure supplement 4—source data 1. — The ‘Magnitude Estimation’ sheet contains all the reported data including information about the electrode number, post-implant day, stimulation frequency, the participant’s response, and the block for each data point. This sheet also contains the classification group of each electrode. The ‘K-means clustering’ sheet contains the median-intensity data for each electrode at the three different stimulation frequencies and the k-means cluster number. [file elife-65128-fig1-figsupp4-data1.xlsx]

## Sheet: Magnitude Estimation
LFP electrode #s	33	34	40	44	45	46	47
HFP electrodes #s	1	2	3	5	8	10	12	13	14	19	20	26	35	42	57
Electrode #	Post-implant day	Frequency (Hz)	Response	Block
3	184	300	1	1
3	184	100	1	1
3	184	20	0	1
3	184	100	1	2
3	184	300	1	2
3	184	20	0	2
3	184	300	0.5	3
3	184	100	1	3
3	184	20	0	3
3	184	100	1	4
3	184	300	1	4
3	184	20	0	4
3	184	300	1	5
3	184	100	1	5
3	184	20	0	5
3	184	300	0.5	6
3	184	20	0	6
3	184	100	0.5	6
3	184	300	0.5	7
3	184	100	1	7
3	184	20	0	7
3	184	20	0	8
3	184	300	1	8
3	184	100	1	8
3	184	300	1	9
3	184	100	0.5	9
3	184	20	0	9
3	184	20	0	10
3	184	100	0.5	10
3	184	300	0.5	10
3	184	100	0.5	11
3	184	20	0	11
3	184	300	0.5	11
3	184	100	0.5	12
3	184	300	0.5	12
3	184	20	0	12
3	184	20	0	13
3	184	100	0.5	13
3	184	300	0.5	13
3	184	100	1	14
3	184	300	0.5	14
3	184	20	0	14
3	184	300	0.5	15
3	184	20	0	15
3	184	100	0.5	15
3	184	300	0.5	16
3	184	20	0	16
3	184	100	0.5	16
3	184	100	0.5	17
3	184	20	0.5	17
3	184	300	0.5	17
3	184	300	0.5	18
3	184	20	0	18
3	184	100	0.5	18
3	184	20	0	19
3	184	100	0.5	19
3	184	300	0.5	19
3	184	300	0.5	20
3	184	20	0	20
3	184	100	0.5	20
3	184	100	0.5	21
3	184	300	0.5	21
3	184	20	0.5	21
52	184	300	1.5	1
52	184	20	1	1
52	184	100	1	1
52	184	300	2	2
52	184	100	1	2
52	184	20	1	2
52	184	20	2	3
52	184	100	1	3
52	184	300	1	3
52	184	20	0.5	4
52	184	300	1	4
52	184	100	2	4
52	184	100	2	5
52	184	20	2	5
52	184	300	2	5
52	184	300	1	6
52	184	100	3	6
52	184	20	1	6
52	184	300	1	7
52	184	20	2	7
52	184	100	2	7
52	184	300	1	8
52	184	20	2	8
52	184	100	1	8
52	184	300	1	9
52	184	20	1	9
52	184	100	1	9
52	184	300	2	10
52	184	100	1	10
52	184	20	1	10
52	184	300	1	11
52	184	20	2	11
52	184	100	2	11
52	184	100	1	12
52	184	300	1.5	12
52	184	20	3	12
52	184	300	2	13
52	184	20	1	13
52	184	100	2	13
52	184	20	1	14
52	184	300	0	14
52	184	100	2	14
52	184	100	1	15
52	184	20	2	15
52	184	300	2	15
52	184	100	2	16
52	184	300	1	16
52	184	20	1	16
52	184	300	0	17
52	184	20	0.5	17
52	184	100	0.5	17
52	184	20	0.5	18
52	184	300	1	18
52	184	100	1.5	18
52	184	100	0	19
52	184	20	2	19
52	184	300	2	19
52	184	100	1	20
52	184	300	0	20
52	184	20	0.2	20
52	184	300	0	21
52	184	20	2	21
52	184	100	1	21
10	184	100	2	1
10	184	300	2	1
10	184	20	1	1
10	184	300	2	2
10	184	20	1	2
10	184	100	3	2
10	184	20	2	3
10	184	300	2	3
10	184	100	2	3
10	184	20	2	4
10	184	100	3	4
10	184	300	1	4
10	184	20	2	5
10	184	100	4	5
10	184	300	2	5
10	184	20	1	6
10	184	100	1	6
10	184	300	0	6
10	184	300	2	7
10	184	100	3	7
10	184	20	1	7
10	184	100	3	8
10	184	300	3	8
10	184	20	2	8
10	184	100	3	9
10	184	20	2	9
10	184	300	2	9
10	184	20	1.2	10
10	184	100	1.5	10
10	184	300	2	10
10	184	20	0	11
10	184	100	3	11
10	184	300	3	11
10	184	300	2	12
10	184	100	2	12
10	184	20	1	12
10	184	20	2	13
10	184	100	1	13
10	184	300	2	13
10	184	20	2	14
10	184	300	2	14
10	184	100	2.5	14
10	184	20	1	15
10	184	100	1	15
10	184	300	1	15
10	184	100	4	16
10	184	300	3	16
10	184	20	2	16
10	184	300	4	17
10	184	20	3	17
10	184	100	3	17
10	184	20	1	18
10	184	100	2	18
10	184	300	3.5	18
10	184	100	2	19
10	184	20	2	19
10	184	300	2	19
10	184	100	1.5	20
10	184	300	1	20
10	184	20	1	20
10	184	300	2	21
10	184	100	2	21
10	184	20	2	21
45	184	20	3	1
45	184	100	2	1
45	184	300	0	1
45	184	20	2.5	2
45	184	100	0.5	2
45	184	300	0	2
45	184	100	0.5	3
45	184	300	0.5	3
45	184	20	2	3
45	184	20	2	4
45	184	300	0.5	4
45	184	100	1	4
45	184	100	1.5	5
45	184	300	1	5
45	184	20	3	5
45	184	100	2	6
45	184	20	4	6
45	184	300	1	6
45	184	300	0.5	7
45	184	20	3	7
45	184	100	4	7
45	184	20	4	8
45	184	300	3	8
45	184	100	4	8
45	184	300	2	9
45	184	100	2	9
45	184	20	3.5	9
45	184	20	2	10
45	184	100	2.5	10
45	184	300	1	10
45	184	20	3	11
45	184	100	2	11
45	184	300	2	11
45	184	20	2.5	12
45	184	300	0	12
45	184	100	1	12
45	184	100	2	13
45	184	20	2.5	13
45	184	300	0.5	13
45	184	300	1	14
45	184	20	4	14
45	184	100	2	14
45	184	100	2.5	15
45	184	300	1	15
45	184	20	3	15
45	184	20	4	16
45	184	300	1	16
45	184	100	4	16
45	184	100	3	17
45	184	20	5	17
45	184	300	0.5	17
45	184	100	6	18
45	184	300	2.5	18
45	184	20	3	18
45	184	20	5	19
45	184	100	6	19
13	190	300	2	1
13	190	20	0.5	1
13	190	100	1	1
13	190	300	2	2
13	190	20	0.5	2
13	190	100	1	2
13	190	20	0.5	3
13	190	300	2	3
13	190	100	2.5	3
13	190	300	2	4
13	190	100	1	4
13	190	20	0.5	4
13	190	300	1.5	5
13	190	100	2	5
13	190	20	0	5
13	190	20	0.5	6
13	190	100	1	6
13	190	300	2	6
13	190	100	1.5	7
13	190	20	0.5	7
13	190	300	2	7
13	190	100	2.5	8
13	190	300	1.5	8
13	190	20	0	8
13	190	300	3	9
13	190	100	4	9
13	190	20	1	9
13	190	20	0.5	10
13	190	300	2	10
13	190	100	3	10
13	190	300	2.5	11
13	190	20	0.5	11
13	190	100	3	11
13	190	20	0.5	12
13	190	100	2	12
13	190	300	2.5	12
13	190	100	2.5	13
13	190	300	1.5	13
13	190	20	0	13
13	190	20	0	14
13	190	300	2.5	14
13	190	100	3	14
13	190	20	0.5	15
13	190	300	2	15
13	190	100	2	15
13	190	100	2.5	16
13	190	300	3.5	16
13	190	20	1	16
13	190	20	0.5	17
13	190	100	2	17
13	190	300	2	17
13	190	100	1.5	18
13	190	20	0.5	18
13	190	300	1.5	18
13	190	300	1.5	19
13	190	20	0	19
13	190	100	1	19
13	190	20	0	20
13	190	300	3	20
13	190	100	3.5	20
13	190	100	1.5	21
13	190	20	0.5	21
13	190	300	2	21
42	190	300	1.5	1
42	190	100	2	1
42	190	20	2	1
42	190	100	1	2
42	190	300	1.5	2
42	190	20	0.5	2
42	190	100	0.5	3
42	190	300	0.5	3
42	190	20	0.5	3
42	190	20	1.5	4
42	190	100	1	4
42	190	300	2	4
42	190	20	2	5
42	190	300	1.5	5
42	190	100	3	5
42	190	20	1.5	6
42	190	100	2	6
42	190	300	1	6
42	190	300	1	7
42	190	20	2	7
42	190	100	2.5	7
42	190	20	2	8
42	190	300	2	8
42	190	100	2.5	8
42	190	20	2	9
42	190	100	2	9
42	190	300	1.5	9
42	190	20	1	10
42	190	300	2	10
42	190	100	1.5	10
42	190	300	2	11
42	190	100	1	11
42	190	20	3	11
42	190	20	3.5	12
42	190	100	3	12
42	190	300	2.5	12
42	190	100	2.5	13
42	190	300	1	13
42	190	20	1.5	13
42	190	20	2	14
42	190	300	1	14
42	190	100	2	14
42	190	300	1	15
42	190	20	1.5	15
42	190	100	2.5	15
42	190	100	2.5	16
42	190	300	2	16
42	190	20	1	16
42	190	20	2	17
42	190	300	0	17
42	190	100	2	17
42	190	20	3	18
42	190	300	2	18
42	190	100	3	18
42	190	100	3.5	19
42	190	300	2	19
42	190	20	2.5	19
42	190	20	2	20
42	190	300	1	20
42	190	100	1.5	20
42	190	100	1	21
42	190	20	1.5	21
42	190	300	1	21
19	190	100	1	1
19	190	300	0.5	1
19	190	20	0	1
19	190	20	0	2
19	190	100	0.5	2
19	190	300	0.5	2
19	190	100	0.5	3
19	190	300	1	3
19	190	20	0	3
19	190	20	0	4
19	190	100	1	4
19	190	300	1.5	4
19	190	20	0.5	5
19	190	300	0.5	5
19	190	100	0	5
19	190	100	1	6
19	190	300	1	6
19	190	20	0	6
19	190	300	0.5	7
19	190	20	0	7
19	190	100	0	7
19	190	20	0	8
19	190	300	0.5	8
19	190	100	0.5	8
19	190	20	0	9
19	190	100	0.5	9
19	190	300	0	9
19	190	100	0	10
19	190	20	0	10
19	190	300	1	10
19	190	20	0	11
19	190	100	1.5	11
19	190	300	0.5	11
19	190	20	0	12
19	190	100	1.5	12
19	190	300	2	12
19	190	100	0	13
19	190	300	0.5	13
19	190	20	0	13
19	190	300	0.5	14
19	190	100	0	14
19	190	20	0	14
19	190	300	0.5	15
19	190	20	0.5	15
19	190	100	1	15
19	190	300	0.5	16
19	190	100	1	16
19	190	20	0	16
19	190	300	1	17
19	190	100	0	17
19	190	20	0	17
19	190	100	0.5	18
19	190	300	0.5	18
19	190	20	0	18
19	190	300	0.5	19
19	190	20	0	19
19	190	100	0.5	19
19	190	300	0.5	20
19	190	20	0	20
19	190	100	0	20
19	190	300	0.5	21
19	190	100	0.5	21
19	190	20	1	21
35	190	20	1	1
35	190	300	2	1
35	190	100	2.5	1
35	190	100	1	2
35	190	20	0.5	2
35	190	300	1	2
35	190	20	0.5	3
35	190	100	3	3
35	190	300	2.5	3
35	190	100	2	4
35	190	20	1	4
35	190	300	1.5	4
35	190	20	0.5	5
35	190	100	3	5
35	190	300	3.5	5
35	190	100	2.5	6
35	190	300	3	6
35	190	20	1	6
35	190	300	2	7
35	190	100	2.5	7
35	190	20	1	7
35	190	100	1	8
35	190	20	2.5	8
35	190	300	2	8
35	190	20	2	9
35	190	300	2.5	9
35	190	100	2.5	9
35	190	300	1	10
35	190	100	2	10
35	190	20	1.5	10
35	190	20	1	11
35	190	100	3	11
35	190	300	3	11
35	190	100	2.5	12
35	190	20	2	12
35	190	300	2.5	12
35	190	100	3	13
35	190	300	3	13
35	190	20	2	13
35	190	100	2.5	14
35	190	20	1.5	14
35	190	300	1.5	14
35	190	100	2	15
35	190	20	2	15
35	190	300	2	15
35	190	100	2.5	16
35	190	20	0.5	16
35	190	300	1.5	16
35	190	20	0	17
35	190	300	1	17
35	190	100	1	17
35	190	300	1.5	18
35	190	20	1	18
35	190	100	2	18
35	190	20	1.5	19
35	190	300	0	19
35	190	100	3	19
35	190	20	2	20
35	190	100	2	20
35	190	300	2	20
35	190	20	1.5	21
35	190	300	1.5	21
35	190	100	2	21
8	251	20	2	1
8	251	100	4	1
8	251	300	3	1
8	251	20	1	2
8	251	100	2	2
8	251	300	4	2
8	251	300	5	3
8	251	100	7	3
8	251	20	1	3
8	251	300	9	4
8	251	100	8	4
8	251	20	2	4
8	251	300	4	5
8	251	20	2	5
8	251	100	4	5
8	251	300	5	6
8	251	100	5	6
8	251	20	3	6
8	251	100	2	7
8	251	300	1	7
8	251	20	0.5	7
8	251	300	3	8
8	251	20	1	8
8	251	100	1	8
8	251	300	2	9
8	251	100	4	9
8	251	20	0.5	9
8	251	100	3	10
8	251	20	0.5	10
8	251	300	3	10
8	251	20	0.5	11
8	251	300	4	11
8	251	100	5	11
8	251	100	8	12
8	251	300	6	12
8	251	20	1	12
8	251	100	3	13
8	251	20	0.5	13
8	251	300	3	13
8	251	100	3	14
8	251	300	3	14
8	251	20	1	14
8	251	20	1	15
8	251	100	3	15
8	251	300	1	15
8	251	300	4	16
8	251	100	4	16
8	251	20	3	16
8	251	300	3	17
8	251	20	2	17
8	251	100	5	17
8	251	300	6	18
8	251	100	5	18
8	251	20	3	18
8	251	100	5	19
8	251	300	6	19
8	251	20	1	19
8	251	20	1	20
8	251	300	2	20
8	251	100	4	20
8	251	300	3	21
8	251	100	2	21
8	251	20	3	21
33	251	300	2	1
33	251	20	4	1
33	251	100	3	1
33	251	100	2	2
33	251	20	4	2
33	251	300	1	2
33	251	20	4	3
33	251	300	1	3
33	251	100	2	3
33	251	20	4	4
33	251	300	1	4
33	251	100	3	4
33	251	300	1	5
33	251	20	4	5
33	251	100	3	5
33	251	20	4	6
33	251	100	3	6
33	251	300	2	6
33	251	300	1	7
33	251	20	4	7
33	251	100	3	7
33	251	20	4	8
33	251	300	1	8
33	251	100	2	8
33	251	300	2	9
33	251	100	3	9
33	251	20	4	9
33	251	100	3	10
33	251	20	4	10
33	251	300	2	10
33	251	300	2	11
33	251	20	4	11
33	251	100	3	11
33	251	100	5	12
33	251	300	1	12
33	251	20	6	12
33	251	100	3	13
33	251	20	4	13
33	251	300	3	13
33	251	20	4	14
33	251	100	3	14
33	251	300	3	14
33	251	300	2	15
33	251	20	4	15
33	251	100	4	15
33	251	20	4	16
33	251	300	3	16
33	251	100	5	16
33	251	100	6	17
33	251	300	3	17
33	251	20	2	17
33	251	20	4	18
33	251	300	3	18
33	251	100	3	18
33	251	300	2	19
33	251	20	4	19
33	251	100	3.5	19
33	251	300	1	20
33	251	20	4	20
33	251	100	3	20
33	251	20	4	21
33	251	300	1	21
33	251	100	2	21
44	251	20	2	1
44	251	300	3	1
44	251	100	2	1
44	251	20	4	2
44	251	300	1	2
44	251	100	2	2
44	251	20	2	3
44	251	100	3	3
44	251	300	4	3
44	251	20	2	4
44	251	300	9	4
44	251	100	5	4
44	251	100	4	5
44	251	20	3	5
44	251	300	4	5
44	251	300	3	6
44	251	100	4	6
44	251	20	5	6
44	251	20	4	7
44	251	300	3	7
44	251	100	4	7
44	251	20	3	8
44	251	100	4	8
44	251	300	3	8
44	251	300	4	9
44	251	20	5	9
44	251	100	5	9
44	251	300	6	10
44	251	100	7	10
44	251	20	5	10
44	251	20	6	11
44	251	300	6	11
44	251	100	7	11
44	251	100	7	12
44	251	300	6	12
44	251	20	2	12
44	251	20	2	13
44	251	100	5	13
44	251	300	4	13
44	251	100	5	14
44	251	300	4	14
44	251	20	5	14
44	251	100	6	15
44	251	300	4	15
44	251	20	3	15
44	251	100	4	16
44	251	20	4	16
44	251	300	4	16
44	251	20	3	17
44	251	300	4	17
44	251	100	3	17
44	251	300	3	18
44	251	20	4	18
44	251	100	5	18
44	251	100	5	19
44	251	20	4	19
44	251	300	5	19
44	251	20	7	20
44	251	100	6	20
44	251	300	4	20
44	251	300	4	21
44	251	100	4	21
44	251	20	3	21
14	251	100	3	1
14	251	300	3	1
14	251	20	0	1
14	251	100	4	2
14	251	20	0	2
14	251	300	4	2
14	251	100	5	3
14	251	300	5	3
14	251	20	1	3
14	251	300	6	4
14	251	100	6	4
14	251	20	0	4
14	251	100	2	5
14	251	20	1	5
14	251	300	2	5
14	251	100	4	6
14	251	20	0	6
14	251	300	2	6
14	251	100	3	7
14	251	20	1	7
14	251	300	2	7
14	251	300	3	8
14	251	100	1	8
14	251	20	0	8
14	251	100	2	9
14	251	20	0	9
14	251	300	3	9
14	251	300	6	10
14	251	100	5	10
14	251	20	0	10
14	251	300	1	11
14	251	100	2	11
14	251	20	1	11
14	251	300	3	12
14	251	100	4	12
14	251	20	0	12
14	251	300	1	13
14	251	20	0	13
14	251	100	3	13
14	251	100	3	14
14	251	300	4	14
14	251	20	0	14
14	251	100	4	15
14	251	20	3	15
14	251	300	3	15
14	251	300	2	16
14	251	20	1	16
14	251	100	3	16
14	251	100	4	17
14	251	300	2	17
14	251	20	0	17
14	251	300	3	18
14	251	20	1	18
14	251	100	4	18
14	251	100	4	19
14	251	300	4	19
14	251	20	1	19
14	251	100	3	20
14	251	300	4	20
14	251	20	0	20
14	251	300	5	21
14	251	100	5	21
14	251	20	3	21
40	251	100	4	1
40	251	20	3	1
40	251	300	1	1
40	251	300	2	2
40	251	100	4	2
40	251	20	5	2
40	251	100	4	3
40	251	300	3	3
40	251	20	6	3
40	251	20	6	4
40	251	100	7	4
40	251	300	4	4
40	251	100	5	5
40	251	300	5	5
40	251	20	6	5
40	251	20	6	6
40	251	100	4	6
40	251	300	2	6
40	251	100	6	7
40	251	300	5	7
40	251	20	7	7
40	251	300	1	8
40	251	100	4	8
40	251	20	6	8
40	251	100	5	9
40	251	300	4	9
40	251	20	6	9
40	251	100	4	10
40	251	300	2	10
40	251	20	6	10
40	251	300	2	11
40	251	100	3	11
40	251	20	6	11
40	251	300	3	12
40	251	100	5	12
40	251	20	6	12
40	251	300	2	13
40	251	100	5	13
40	251	20	3	13
40	251	300	3	14
40	251	100	3	14
26	251	20	0	1
26	251	100	2	1
26	251	300	1	1
26	251	300	0	2
26	251	20	0	2
26	251	100	1	2
26	251	20	0	3
26	251	100	1	3
26	251	300	1	3
26	251	20	0	4
26	251	100	2	4
26	251	300	3	4
26	251	100	1	5
26	251	300	4	5
26	251	20	0	5
26	251	100	4	6
26	251	20	0	6
26	251	300	3	6
26	251	20	0	7
26	251	300	3	7
26	251	100	3	7
26	251	100	2	8
26	251	300	3	8
26	251	20	0	8
26	251	100	2	9
26	251	300	1	9
26	251	20	0	9
26	251	300	2	10
26	251	20	0	10
26	251	100	1	10
26	251	300	2	11
26	251	100	3	11
26	251	20	0	11
26	251	20	0	12
26	251	100	3	12
26	251	300	3	12
26	251	20	1	13
26	251	100	2	13
26	251	300	3	13
26	251	100	2	14
26	251	20	0	14
26	251	300	2	14
26	251	100	3	15
26	251	300	3	15
26	251	20	0	15
26	251	20	0	16
26	251	100	3	16
26	251	300	2	16
26	251	20	0	17
26	251	300	2	17
26	251	100	3	17
26	251	100	1	18
26	251	20	0	18
26	251	300	2	18
26	251	20	0	19
26	251	100	3	19
26	251	300	2	19
26	251	20	0	20
26	251	300	2	20
26	251	100	3	20
26	251	300	2	21
26	251	20	1	21
26	251	100	2	21
57	251	20	1	1
57	251	300	1	1
57	251	100	2	1
57	251	100	3	2
57	251	300	1	2
57	251	20	0	2
57	251	300	2	3
57	251	20	0	3
57	251	100	1	3
57	251	100	1	4
57	251	300	3	4
57	251	20	1	4
57	251	300	1	5
57	251	100	2	5
57	251	20	2	5
57	251	100	1	6
57	251	20	1	6
57	251	300	1	6
57	251	100	2	7
57	251	20	1	7
57	251	300	2	7
57	251	100	2	8
57	251	300	1	8
57	251	20	2	8
57	251	300	3	9
57	251	100	3	9
57	251	20	2	9
57	251	20	1	10
57	251	100	2	10
57	251	300	3	10
57	251	20	1	11
57	251	300	1	11
57	251	100	2	11
57	251	100	2	12
57	251	300	1	12
57	251	20	0.5	12
57	251	300	1	13
57	251	100	1	13
57	251	20	1	13
57	251	20	0.5	14
57	251	300	0.5	14
57	251	100	2	14
57	251	300	1	15
57	251	100	2	15
57	251	20	1	15
57	251	20	1	16
57	251	100	0.5	16
57	251	300	1	16
57	251	100	2	17
57	251	300	2	17
57	251	20	2	17
57	251	100	3	18
57	251	300	1	18
57	251	20	0.5	18
57	251	300	1	19
57	251	100	2	19
57	251	20	0.5	19
57	251	300	2	20
57	251	20	3	20
57	251	100	1	20
57	251	300	1	21
57	251	20	1	21
57	251	100	1	21
1	251	20	0	1
1	251	300	1	1
1	251	100	1	1
1	251	100	1	2
1	251	20	2	2
1	251	300	3	2
1	251	100	1	3
1	251	20	1	3
1	251	300	1	3
1	251	100	1	4
1	251	300	2	4
1	251	20	0	4
1	251	100	1	5
1	251	300	1	5
1	251	20	0	5
1	251	300	1	6
1	251	100	1	6
1	251	20	0	6
1	251	20	0	7
1	251	100	1	7
1	251	300	1	7
1	251	100	1	8
1	251	300	2	8
1	251	20	1	8
1	251	100	1	9
1	251	300	2	9
1	251	20	1	9
1	251	20	0	10
1	251	300	4	10
1	251	100	2	10
1	251	300	4	11
1	251	20	0	11
1	251	100	1	11
1	251	20	0	12
1	251	300	2	12
1	251	100	1	12
1	251	20	0	13
1	251	300	2	13
1	251	100	1	13
1	251	20	0	14
1	251	100	1	14
1	251	300	2	14
1	251	300	0	15
1	251	100	2	15
1	251	20	3	15
1	251	20	2	16
1	251	100	1	16
1	251	300	2	16
1	251	300	2	17
1	251	20	0	17
1	251	100	1	17
1	251	300	1	18
1	251	20	1	18
1	251	100	1	18
1	251	20	0	19
1	251	100	0	19
1	251	300	0	19
1	251	100	2	20
1	251	300	1	20
1	251	20	0	20
1	251	100	1	21
1	251	20	1	21
1	251	300	1	21
2	254	300	3	1
2	254	20	1	1
2	254	100	3	1
2	254	20	1	2
2	254	100	2	2
2	254	300	2	2
2	254	100	3	3
2	254	20	2	3
2	254	300	3	3
2	254	100	2	4
2	254	300	2	4
2	254	20	1	4
2	254	100	3	5
2	254	300	2	5
2	254	20	1	5
2	254	100	4	6
2	254	20	2	6
2	254	300	3	6
2	254	20	2	7
2	254	100	3	7
2	254	300	2	7
2	254	20	1	8
2	254	100	3	8
2	254	300	4	8
2	254	20	1	9
2	254	100	3	9
2	254	300	2	9
2	254	300	3	10
2	254	20	1	10
2	254	100	2	10
2	254	20	1	11
2	254	100	2	11
2	254	300	3	11
2	254	20	1	12
2	254	100	2	12
2	254	300	2	12
2	254	300	3	13
2	254	100	3	13
2	254	20	1	13
2	254	100	2	14
2	254	20	1	14
2	254	300	3	14
2	254	100	1	15
2	254	20	1	15
2	254	300	2	15
2	254	300	3	16
2	254	100	2	16
2	254	20	1	16
2	254	100	3	17
2	254	20	2	17
2	254	300	1	17
2	254	20	2	18
2	254	300	2	18
2	254	100	2	18
2	254	300	2	19
2	254	20	1	19
2	254	100	3	19
2	254	100	3	20
2	254	300	4	20
2	254	20	1	20
2	254	100	3	21
2	254	300	2	21
2	254	20	1	21
34	254	20	2	1
34	254	300	2	1
34	254	100	3	1
34	254	300	1	2
34	254	20	4	2
34	254	100	2	2
34	254	100	3	3
34	254	300	1	3
34	254	20	4	3
34	254	20	3	4
34	254	300	2	4
34	254	100	3	4
34	254	100	3	5
34	254	20	2	5
34	254	300	1	5
34	254	100	2	6
34	254	300	2	6
34	254	20	3	6
34	254	20	3	7
34	254	100	2	7
34	254	300	3	7
34	254	100	2	8
34	254	300	2	8
34	254	20	3	8
34	254	100	3	9
34	254	300	4	9
34	254	20	3	9
34	254	100	5	10
34	254	20	4	10
34	254	300	3	10
34	254	100	3	11
34	254	20	2	11
34	254	300	2	11
34	254	100	3	12
34	254	20	3	12
34	254	300	1	12
34	254	100	3	13
34	254	300	1	13
34	254	20	2	13
34	254	300	2	14
34	254	100	3	14
34	254	20	2	14
34	254	300	1	15
34	254	20	3	15
34	254	100	2	15
34	254	20	2	16
34	254	300	2	16
34	254	100	3	16
34	254	100	3	17
34	254	20	2	17
34	254	300	3	17
34	254	20	4	18
34	254	300	3	18
34	254	100	5	18
34	254	100	4	19
34	254	20	3	19
34	254	300	3	19
34	254	300	2	20
34	254	20	4	20
34	254	100	3	20
34	254	300	3	21
34	254	20	4	21
34	254	100	4	21
5	254	300	2	1
5	254	20	1	1
5	254	100	3	1
5	254	300	2	2
5	254	100	2	2
5	254	20	1	2
5	254	100	4	3
5	254	20	1	3
5	254	300	2	3
5	254	300	2	4
5	254	100	2	4
5	254	20	1	4
5	254	20	1	5
5	254	300	3	5
5	254	100	2	5
5	254	300	2	6
5	254	20	1	6
5	254	100	1	6
5	254	300	2	7
5	254	20	1	7
5	254	100	3	7
5	254	20	2	8
5	254	300	3	8
5	254	100	3	8
5	254	100	2	9
5	254	20	1	9
5	254	300	2	9
5	254	300	1	10
5	254	20	2	10
5	254	100	3	10
5	254	20	1	11
5	254	100	2	11
5	254	300	2	11
5	254	300	2	12
5	254	20	1	12
5	254	100	3	12
5	254	100	4	13
5	254	300	4	13
5	254	20	1	13
5	254	100	2	14
5	254	300	2	14
5	254	20	1	14
5	254	300	2	15
5	254	20	1	15
5	254	100	2	15
5	254	100	2	16
5	254	20	1	16
5	254	300	3	16
5	254	300	2	17
5	254	20	1	17
5	254	100	2	17
5	254	20	1	18
5	254	300	3	18
5	254	100	4	18
5	254	20	1	19
5	254	300	2	19
5	254	100	4	19
5	254	20	3	20
5	254	300	4	20
5	254	100	5	20
5	254	100	4	21
5	254	20	1	21
5	254	300	3	21
46	254	100	1	1
46	254	300	1	1
46	254	20	3	1
46	254	100	1	2
46	254	20	2	2
46	254	300	1	2
46	254	20	2	3
46	254	100	1	3
46	254	300	1	3
46	254	20	3	4
46	254	100	2	4
46	254	300	2	4
46	254	300	1	5
46	254	100	3	5
46	254	20	3	5
46	254	20	3	6
46	254	100	2	6
46	254	300	1	6
46	254	300	1	7
46	254	100	3	7
46	254	20	3	7
46	254	20	2	8
46	254	100	1	8
46	254	300	1	8
46	254	300	3	9
46	254	20	4	9
46	254	100	1	9
46	254	20	1	10
46	254	300	0.5	10
46	254	100	2	10
46	254	300	2	11
46	254	20	3	11
46	254	100	1	11
46	254	100	3	12
46	254	20	2	12
46	254	300	1	12
46	254	300	1	13
46	254	100	2	13
46	254	20	2	13
46	254	20	1	14
46	254	100	3	14
46	254	300	2	14
46	254	20	4	15
46	254	300	1	15
46	254	100	2	15
46	254	20	3	16
46	254	300	2	16
46	254	100	2	16
46	254	300	1	17
46	254	20	3	17
46	254	100	2	17
46	254	300	1	18
46	254	20	3	18
46	254	100	3	18
46	254	100	3	19
46	254	300	4	19
46	254	20	3	19
46	254	100	4	20
46	254	300	1	20
46	254	20	4	20
46	254	300	1	21
46	254	20	4	21
46	254	100	3	21
12	254	300	1	1
12	254	20	1	1
12	254	100	1	1
12	254	300	1	2
12	254	100	1	2
12	254	20	2	2
12	254	100	2	3
12	254	20	1	3
12	254	300	1	3
12	254	300	2	4
12	254	20	2	4
12	254	100	2	4
12	254	100	1	5
12	254	300	1	5
12	254	20	1	5
12	254	20	2	6
12	254	300	3	6
12	254	100	3	6
12	254	300	2	7
12	254	100	3	7
12	254	20	2	7
12	254	100	2	8
12	254	300	2	8
12	254	20	1	8
12	254	100	2	9
12	254	300	2	9
12	254	20	1	9
12	254	300	1	10
12	254	100	2	10
12	254	20	1	10
12	254	300	1	11
12	254	20	1	11
12	254	100	3	11
12	254	300	3	12
12	254	20	1	12
12	254	100	2	12
12	254	300	1	13
12	254	100	2	13
12	254	20	1	13
12	254	100	2	14
12	254	300	1	14
12	254	20	1	14
12	254	300	1	15
12	254	20	1	15
12	254	100	2	15
12	254	300	2	16
12	254	20	1	16
12	254	100	2	16
12	254	300	2	17
12	254	100	3	17
12	254	20	2	17
12	254	100	3	18
12	254	300	3	18
12	254	20	2	18
12	254	20	2	19
12	254	300	2	19
12	254	100	1	19
12	254	100	2	20
12	254	300	2	20
12	254	20	2	20
12	254	100	3	21
12	254	300	2	21
12	254	20	1	21
47	254	20	3	1
47	254	100	2	1
47	254	300	1	1
47	254	100	1	2
47	254	20	3	2
47	254	300	2	2
47	254	300	1	3
47	254	100	1	3
47	254	20	2	3
47	254	100	2	4
47	254	20	3	4
47	254	300	3	4
47	254	300	2	5
47	254	20	4	5
47	254	100	3	5
47	254	20	3	6
47	254	100	2	6
47	254	300	2	6
47	254	300	3	7
47	254	20	4	7
47	254	100	2	7
47	254	20	3	8
47	254	100	3	8
47	254	300	2	8
47	254	100	3	9
47	254	20	4	9
47	254	300	2	9
47	254	300	1	10
47	254	100	2	10
47	254	20	3	10
47	254	300	1	11
47	254	20	2	11
47	254	100	2	11
47	254	300	1	12
47	254	100	4	12
47	254	20	3	12
47	254	100	3	13
47	254	300	3	13
47	254	20	4	13
47	254	100	5	14
47	254	300	3	14
47	254	20	3	14
47	254	300	3	15
47	254	20	3	15
47	254	100	4	15
47	254	20	2	16
47	254	100	2	16
47	254	300	3	16
47	254	300	2	17
47	254	100	3	17
47	254	20	4	17
47	254	300	3	18
47	254	20	4	18
47	254	100	3	18
47	254	300	3	19
47	254	20	2	19
47	254	100	3	19
47	254	20	3	20
47	254	100	2	20
47	254	300	1	20
47	254	300	1	21
47	254	100	2	21
47	254	20	3	21
20	254	100	1	1
20	254	20	1	1
20	254	300	2	1
20	254	100	2	2
20	254	300	2	2
20	254	20	1	2
20	254	20	1	3
20	254	100	1	3
20	254	300	1	3
20	254	300	1	4
20	254	100	3	4
20	254	20	1	4
20	254	300	3	5
20	254	100	2	5
20	254	20	1	5
20	254	20	2	6
20	254	100	3	6
20	254	300	4	6
20	254	100	2	7
20	254	20	1	7
20	254	300	2	7
20	254	100	1	8
20	254	20	2	8
20	254	300	3	8
20	254	100	2	9
20	254	300	3	9
20	254	20	2	9
20	254	100	1	10
20	254	300	3	10
20	254	20	1	10
20	254	300	2	11
20	254	20	2	11
20	254	100	3	11
20	254	300	2	12
20	254	20	2	12
20	254	100	3	12
20	254	100	2	13
20	254	20	3	13
20	254	300	3	13
20	254	20	1	14
20	254	100	2	14
20	254	300	3	14
20	254	300	3	15
20	254	20	1	15
20	254	100	3	15
20	254	100	2	16
20	254	20	3	16
20	254	300	2	16
20	254	20	1	17
20	254	100	3	17
20	254	300	1	17
20	254	20	2.5	18
20	254	300	2	18
20	254	100	3	18
20	254	20	1	19
20	254	100	2	19
20	254	300	1	19
20	254	100	1	20
20	254	300	1.5	20
20	254	20	0.5	20
20	254	20	0.5	21
20	254	300	2	21
20	254	100	2	21
40	268	20	5	1
40	268	300	2	1
40	268	100	2	1
40	268	100	2	2
40	268	300	1	2
40	268	20	3	2
40	268	20	4	3
40	268	100	2	3
40	268	300	2	3
40	268	100	2	4
40	268	20	3	4
40	268	300	4	4
40	268	100	1	5
40	268	300	3	5
40	268	20	3	5
40	268	300	3	6
40	268	20	4	6
40	268	100	4	6
40	268	300	3	7
40	268	20	3	7
40	268	100	4	7
40	268	300	3	8
40	268	100	2	8
40	268	20	4	8
40	268	20	4	9
40	268	300	1	9
40	268	100	2	9
40	268	300	2	10
40	268	100	2	10
40	268	20	2	10
40	268	20	4	11
40	268	300	3	11
40	268	100	4	11
40	268	300	3	12
40	268	100	4	12
40	268	20	5	12
40	268	20	3	13
40	268	100	4	13
40	268	300	3	13
40	268	300	2	14
40	268	20	4	14
40	268	100	3	14
40	268	300	2	15
40	268	100	5	15
40	268	20	2	15
40	268	300	3	16
40	268	20	3	16

## Sheet: K-means clustering
Electrode #	Median intensity at 20 Hz	Median intensity at 100 Hz	Median intensity at 300 Hz	Cluster #
1	0	1	2	1
2	1	3	2	1
3	0	0.5	0.5	1
5	1	3	2	1
8	1	4	3	1
10	2	2	2	1
12	1	2	2	1
13	0.5	2	2	1
14	0	4	3	1
19	0	0.5	0.5	1
20	1	2	2	1
26	0	2	2	1
33	4	3	2	2
34	3	3	2	2
35	1	2.5	2	1
40	6	4	2	2
42	2	2	1.5	1
44	4	5	4	2
45	3	2	1	2
46	3	2	1	2
47	3	2	2	2
57	1	2	1	1
