# Supplementary material for: Perception of microstimulation frequency in human somatosensory cortex
Source: eLife. 2021 Jul 27;10:e65128. doi: 10.7554/eLife.65128 (PMC8376245; doi:10.7554/eLife.65128)
Supplement: Figure 1—source data 1. — Each sheet contains data for one of the three frequency preference groups (LFP, IFP, or HFP). Each sheet contains information about the electrode number, post-implant day on which the testing was performed, stimulation frequency, the participant’s response, and the block for each data point. [file elife-65128-fig1-data1.xlsx]

## Sheet: LFP
Electrode #	Post-implant day	Frequency (Hz)	Response	Block
2	813	20	3	1
2	813	20	1.5	2
2	813	20	2	3
2	813	20	2	4
2	813	20	2	5
2	813	20	3	6
2	815	20	2.5	1
2	815	20	1	2
2	815	20	1.5	3
2	815	20	2.5	4
2	815	20	2.25	5
2	815	20	3	6
2	913	20	0.5	1
2	913	20	0.75	2
2	913	20	1.25	3
2	913	20	0.5	4
2	913	20	1.25	5
2	913	20	1	6
12	813	20	0.5	1
12	813	20	1	2
12	813	20	1	3
12	813	20	3	4
12	813	20	2	5
12	813	20	2.5	6
12	913	20	0.5	1
12	913	20	0.5	2
12	913	20	1.75	3
12	913	20	1	4
12	913	20	1	5
12	913	20	1	6
12	960	20	0.5	1
12	960	20	0.25	2
12	960	20	0.75	3
12	960	20	1	4
12	960	20	1	5
12	960	20	0.75	6
12	974	20	0.2	1
12	974	20	0.3	2
12	974	20	0.75	3
12	974	20	0.75	4
12	974	20	1.2	5
12	974	20	1	6
12	1029	20	0.4	1
12	1029	20	0.3	2
12	1029	20	0.5	3
12	1029	20	0.8	4
12	1029	20	0.9	5
12	1029	20	1.1	6
42	889	20	2.5	1
42	889	20	0.75	2
42	889	20	1	3
42	889	20	1.5	4
42	889	20	1.25	5
42	889	20	1	6
42	896	20	2	1
42	896	20	1	2
42	896	20	1	3
42	896	20	1	4
42	896	20	2	5
42	896	20	1.5	6
49	826	20	3	1
49	826	20	1.5	2
49	826	20	1	3
49	826	20	1.5	4
49	826	20	1.5	5
49	826	20	2	6
63	826	20	2.25	1
63	826	20	2	2
63	826	20	1	3
63	826	20	2	4
63	826	20	1.75	5
63	826	20	2	6
63	889	20	1.5	1
63	889	20	1	2
63	889	20	1	3
63	889	20	0.5	4
63	889	20	0.75	5
63	889	20	1.25	6
63	896	20	0.25	1
63	896	20	1	2
63	896	20	1	3
63	896	20	1	4
63	896	20	1.5	5
63	896	20	1	6
2	813	40	3	1
2	813	40	2	2
2	813	40	2.5	3
2	813	40	3	4
2	813	40	3	5
2	813	40	3	6
2	815	40	2	1
2	815	40	2	2
2	815	40	2	3
2	815	40	3	4
2	815	40	3	5
2	815	40	3	6
2	913	40	1	1
2	913	40	1	2
2	913	40	1	3
2	913	40	1	4
2	913	40	1	5
2	913	40	1	6
12	813	40	1.5	1
12	813	40	2	2
12	813	40	2	3
12	813	40	3	4
12	813	40	3	5
12	813	40	2.5	6
12	913	40	1	1
12	913	40	1.5	2
12	913	40	2	3
12	913	40	1.5	4
12	913	40	2	5
12	913	40	2	6
12	960	40	1	1
12	960	40	1.25	2
12	960	40	1.4	3
12	960	40	1.6	4
12	960	40	2	5
12	960	40	1.6	6
12	974	40	1	1
12	974	40	1	2
12	974	40	1	3
12	974	40	1.25	4
12	974	40	1.25	5
12	974	40	1.2	6
12	1029	40	0.5	1
12	1029	40	0.4	2
12	1029	40	0.75	3
12	1029	40	1.1	4
12	1029	40	1.1	5
12	1029	40	1.25	6
42	889	40	1	1
42	889	40	1	2
42	889	40	1.5	3
42	889	40	1	4
42	889	40	1	5
42	889	40	1	6
42	896	40	1.5	1
42	896	40	1	2
42	896	40	1	3
42	896	40	1.5	4
42	896	40	2	5
42	896	40	1.5	6
49	826	40	3	1
49	826	40	1.5	2
49	826	40	1.5	3
49	826	40	2	4
49	826	40	1.5	5
49	826	40	1.5	6
63	826	40	2	1
63	826	40	2	2
63	826	40	2	3
63	826	40	2	4
63	826	40	2	5
63	826	40	1.75	6
63	889	40	1.5	1
63	889	40	0.75	2
63	889	40	1	3
63	889	40	0.75	4
63	889	40	1	5
63	889	40	1	6
63	896	40	1.25	1
63	896	40	1	2
63	896	40	1.25	3
63	896	40	1.5	4
63	896	40	1.5	5
63	896	40	1.25	6
2	813	60	1	1
2	813	60	1	2
2	813	60	2	3
2	813	60	2.5	4
2	813	60	2	5
2	813	60	3	6
2	815	60	2	1
2	815	60	2	2
2	815	60	1.5	3
2	815	60	2	4
2	815	60	2.5	5
2	815	60	3	6
2	913	60	1	1
2	913	60	1.25	2
2	913	60	1.25	3
2	913	60	1	4
2	913	60	1.5	5
2	913	60	1	6
12	813	60	1.5	1
12	813	60	2	2
12	813	60	2	3
12	813	60	3.5	4
12	813	60	3.5	5
12	813	60	2.75	6
12	913	60	2	1
12	913	60	1.5	2
12	913	60	2.25	3
12	913	60	2	4
12	913	60	2	5
12	913	60	2.5	6
12	960	60	1.25	1
12	960	60	1.25	2
12	960	60	1.6	3
12	960	60	1.75	4
12	960	60	1.75	5
12	960	60	1.75	6
12	974	60	1	1
12	974	60	0.75	2
12	974	60	1.25	3
12	974	60	1.25	4
12	974	60	1.5	5
12	974	60	1.3	6
12	1029	60	0.75	1
12	1029	60	1	2
12	1029	60	0.6	3
12	1029	60	1.2	4
12	1029	60	1.1	5
12	1029	60	1.25	6
42	889	60	0.5	1
42	889	60	0.5	2
42	889	60	1	3
42	889	60	0.5	4
42	889	60	0.5	5
42	889	60	1	6
42	896	60	0.5	1
42	896	60	1	2
42	896	60	1.5	3
42	896	60	1.5	4
42	896	60	1.5	5
42	896	60	1.5	6
49	826	60	1	1
49	826	60	1.5	2
49	826	60	1.5	3
49	826	60	1.5	4
49	826	60	2	5
49	826	60	1.25	6
63	826	60	2	1
63	826	60	1.5	2
63	826	60	2	3
63	826	60	2	4
63	826	60	2	5
63	826	60	2.25	6
63	889	60	1	1
63	889	60	0.75	2
63	889	60	0.75	3
63	889	60	1	4
63	889	60	1.25	5
63	889	60	1.5	6
63	896	60	0.5	1
63	896	60	1	2
63	896	60	1	3
63	896	60	1.5	4
63	896	60	1	5
63	896	60	1.5	6
2	813	80	2	1
2	813	80	1	2
2	813	80	2	3
2	813	80	1.5	4
2	813	80	2.5	5
2	813	80	2	6
2	815	80	1.5	1
2	815	80	1	2
2	815	80	2	3
2	815	80	2	4
2	815	80	2.5	5
2	815	80	2	6
2	913	80	1	1
2	913	80	1.25	2
2	913	80	1.5	3
2	913	80	1	4
2	913	80	1	5
2	913	80	1.5	6
12	813	80	2	1
12	813	80	2	2
12	813	80	2	3
12	813	80	3	4
12	813	80	3	5
12	813	80	2.5	6
12	913	80	2	1
12	913	80	1.5	2
12	913	80	1.75	3
12	913	80	1.5	4
12	913	80	2.25	5
12	913	80	2	6
12	960	80	1	1
12	960	80	1.4	2
12	960	80	1.5	3
12	960	80	1.75	4
12	960	80	2	5
12	960	80	2	6
12	974	80	1	1
12	974	80	0.8	2
12	974	80	1.25	3
12	974	80	1.2	4
12	974	80	1.5	5
12	974	80	1.2	6
12	1029	80	0.6	1
12	1029	80	1	2
12	1029	80	1	3
12	1029	80	1.25	4
12	1029	80	1	5
12	1029	80	1.3	6
42	889	80	0.5	1
42	889	80	0.5	2
42	889	80	1	3
42	889	80	0.5	4
42	889	80	1.5	5
42	889	80	0.5	6
42	896	80	1	1
42	896	80	0.5	2
42	896	80	0.25	3
42	896	80	1.5	4
42	896	80	1	5
42	896	80	1.5	6
49	826	80	1.5	1
49	826	80	1.5	2
49	826	80	1.5	3
49	826	80	1.5	4
49	826	80	1.5	5
49	826	80	2	6
63	826	80	1.25	1
63	826	80	2.5	2
63	826	80	1.5	3
63	826	80	2	4
63	826	80	2	5
63	826	80	2	6
63	889	80	1.5	1
63	889	80	0.5	2
63	889	80	1.25	3
63	889	80	1	4
63	889	80	1.25	5
63	889	80	1.5	6
63	896	80	1	1
63	896	80	1.5	2
63	896	80	1.5	3
63	896	80	1.75	4
63	896	80	1.75	5
63	896	80	1.5	6
2	813	100	1.5	1
2	813	100	1.5	2
2	813	100	1	3
2	813	100	2	4
2	813	100	1.5	5
2	813	100	2	6
2	815	100	1.5	1
2	815	100	1	2
2	815	100	1.5	3
2	815	100	2	4
2	815	100	2	5
2	815	100	2.5	6
2	913	100	1	1
2	913	100	1	2
2	913	100	1.25	3
2	913	100	1	4
2	913	100	0.5	5
2	913	100	1.25	6
12	813	100	2	1
12	813	100	2.5	2
12	813	100	2	3
12	813	100	3	4
12	813	100	3	5
12	813	100	2.5	6
12	913	100	2	1
12	913	100	0.75	2
12	913	100	2	3
12	913	100	2	4
12	913	100	2	5
12	913	100	2.25	6
12	960	100	1.25	1
12	960	100	1.4	2
12	960	100	1.5	3
12	960	100	1.75	4
12	960	100	1.75	5
12	960	100	1.6	6
12	974	100	0.75	1
12	974	100	1	2
12	974	100	1.25	3
12	974	100	1.2	4
12	974	100	1.25	5
12	974	100	1.3	6
12	1029	100	0.7	1
12	1029	100	1.1	2
12	1029	100	0.75	3
12	1029	100	1.2	4
12	1029	100	1.2	5
12	1029	100	1.25	6
42	889	100	0.25	1
42	889	100	1	2
42	889	100	0.75	3
42	889	100	0.25	4
42	889	100	0.25	5
42	889	100	0.5	6
42	896	100	0.5	1
42	896	100	1.5	2
42	896	100	1	3
42	896	100	1.5	4
42	896	100	0.5	5
42	896	100	1	6
49	826	100	1	1
49	826	100	1	2
49	826	100	1	3
49	826	100	1	4
49	826	100	1.5	5
49	826	100	2	6
63	826	100	1	1
63	826	100	1	2
63	826	100	1	3
63	826	100	2	4
63	826	100	1.75	5
63	826	100	1	6
63	889	100	0.5	1
63	889	100	0.75	2
63	889	100	1.25	3
63	889	100	0.5	4
63	889	100	1	5
63	889	100	1.4	6
63	896	100	1	1
63	896	100	0.5	2
63	896	100	1	3
63	896	100	1.5	4
63	896	100	1.5	5
63	896	100	1.5	6
2	813	150	1	1
2	813	150	1	2
2	813	150	1	3
2	813	150	2	4
2	813	150	1.5	5
2	813	150	1	6
2	815	150	1.5	1
2	815	150	1	2
2	815	150	1.5	3
2	815	150	2	4
2	815	150	2.5	5
2	815	150	2	6
2	913	150	0.75	1
2	913	150	1	2
2	913	150	1.5	3
2	913	150	0.5	4
2	913	150	0.5	5
2	913	150	1.5	6
12	813	150	2	1
12	813	150	1.5	2
12	813	150	2	3
12	813	150	3	4
12	813	150	3	5
12	813	150	2	6
12	913	150	2	1
12	913	150	1.5	2
12	913	150	2.25	3
12	913	150	1	4
12	913	150	2.5	5
12	913	150	1.5	6
12	960	150	1.25	1
12	960	150	1.25	2
12	960	150	1.25	3
12	960	150	1.75	4
12	960	150	1.25	5
12	960	150	1.5	6
12	974	150	1	1
12	974	150	1.2	2
12	974	150	1.25	3
12	974	150	1.2	4
12	974	150	1.4	5
12	974	150	1.15	6
12	1029	150	0.75	1
12	1029	150	1	2
12	1029	150	0.8	3
12	1029	150	1.1	4
12	1029	150	0.9	5
12	1029	150	1.2	6
42	889	150	0.25	1
42	889	150	0.25	2
42	889	150	0.1	3
42	889	150	0.25	4
42	889	150	0.25	5
42	889	150	0.25	6
42	896	150	0.5	1
42	896	150	1	2
42	896	150	1	3
42	896	150	0.5	4
42	896	150	1	5
42	896	150	0.25	6
49	826	150	0.5	1
49	826	150	1.5	2
49	826	150	0.75	3
49	826	150	1	4
49	826	150	1	5
49	826	150	1	6
63	826	150	2	1
63	826	150	2	2
63	826	150	1.5	3
63	826	150	1.5	4
63	826	150	1.5	5
63	826	150	1	6
63	889	150	1	1
63	889	150	0.5	2
63	889	150	0.75	3
63	889	150	1	4
63	889	150	1.25	5
63	889	150	1.5	6
63	896	150	0.5	1
63	896	150	1	2
63	896	150	1	3
63	896	150	1	4
63	896	150	1.5	5
63	896	150	1.5	6
2	813	200	1	1
2	813	200	1	2
2	813	200	1.5	3
2	813	200	1	4
2	813	200	1.5	5
2	813	200	1.5	6
2	815	200	1.5	1
2	815	200	2	2
2	815	200	1.75	3
2	815	200	1.5	4
2	815	200	2	5
2	815	200	2.5	6
2	913	200	1	1
2	913	200	0.75	2
2	913	200	1	3
2	913	200	0.75	4
2	913	200	1.5	5
2	913	200	1.5	6
12	813	200	2	1
12	813	200	2	2
12	813	200	2	3
12	813	200	3.5	4
12	813	200	3	5
12	813	200	2	6
12	913	200	1	1
12	913	200	1	2
12	913	200	2.5	3
12	913	200	1.5	4
12	913	200	1.75	5
12	913	200	2	6
12	960	200	1.25	1
12	960	200	1	2
12	960	200	1.5	3
12	960	200	1.75	4
12	960	200	1.5	5
12	960	200	1.25	6
12	974	200	1	1
12	974	200	1	2
12	974	200	1.25	3
12	974	200	1	4
12	974	200	1.2	5
12	974	200	1.2	6
12	1029	200	0.75	1
12	1029	200	0.8	2
12	1029	200	0.7	3
12	1029	200	1.1	4
12	1029	200	1.2	5
12	1029	200	1.25	6
42	889	200	0.25	1
42	889	200	0.25	2
42	889	200	0.1	3
42	889	200	0	4
42	889	200	0.5	5
42	889	200	0.1	6
42	896	200	0.5	1
42	896	200	0.25	2
42	896	200	0.5	3
42	896	200	1	4
42	896	200	0.25	5
42	896	200	1	6
49	826	200	0.5	1
49	826	200	1	2
49	826	200	1	3
49	826	200	1	4
49	826	200	1	5
49	826	200	1	6
63	826	200	1	1
63	826	200	1	2
63	826	200	1.5	3
63	826	200	1.5	4
63	826	200	1.5	5
63	826	200	2	6
63	889	200	1	1
63	889	200	0.5	2
63	889	200	0.5	3
63	889	200	0.25	4
63	889	200	1	5
63	889	200	1.25	6
63	896	200	0.5	1
63	896	200	0.5	2
63	896	200	1	3
63	896	200	1.5	4
63	896	200	1.5	5
63	896	200	1	6
2	813	250	1	1
2	813	250	1	2
2	813	250	1	3
2	813	250	1	4
2	813	250	2	5
2	813	250	1.5	6
2	815	250	1	1
2	815	250	2	2
2	815	250	1	3
2	815	250	1.5	4
2	815	250	2	5
2	815	250	2.5	6
2	913	250	0.75	1
2	913	250	0.5	2
2	913	250	1	3
2	913	250	1	4
2	913	250	1.25	5
2	913	250	0.5	6
12	813	250	2	1
12	813	250	2.5	2
12	813	250	2	3
12	813	250	2.5	4
12	813	250	2	5
12	813	250	2.5	6
12	913	250	2	1
12	913	250	1.5	2
12	913	250	2	3
12	913	250	1	4
12	913	250	2	5
12	913	250	1.5	6
12	960	250	1	1
12	960	250	1.4	2
12	960	250	1.5	3
12	960	250	1.25	4
12	960	250	1.6	5
12	960	250	1.5	6
12	974	250	1	1
12	974	250	1	2
12	974	250	1.2	3
12	974	250	1.2	4
12	974	250	1.2	5
12	974	250	1.2	6
12	1029	250	0.75	1
12	1029	250	1	2
12	1029	250	0.8	3
12	1029	250	1.1	4
12	1029	250	1	5
12	1029	250	1.2	6
42	889	250	0.25	1
42	889	250	0.25	2
42	889	250	0.1	3
42	889	250	0	4
42	889	250	0.25	5
42	889	250	0.25	6
42	896	250	0.25	1
42	896	250	0.25	2
42	896	250	0.25	3
42	896	250	0.5	4
42	896	250	0.5	5
42	896	250	0.5	6
49	826	250	0.5	1
49	826	250	1	2
49	826	250	1	3
49	826	250	0.5	4
49	826	250	1	5
49	826	250	1.5	6
63	826	250	1	1
63	826	250	1	2
63	826	250	1	3
63	826	250	2	4
63	826	250	1.5	5
63	826	250	1.5	6
63	889	250	0.5	1
63	889	250	1	2
63	889	250	1	3
63	889	250	1	4
63	889	250	0.75	5
63	889	250	1.4	6
63	896	250	0.5	1
63	896	250	1	2
63	896	250	0.5	3
63	896	250	1.5	4
63	896	250	1	5
63	896	250	1	6
2	813	300	1	1
2	813	300	1	2
2	813	300	0.5	3
2	813	300	1	4
2	813	300	1	5
2	813	300	1	6
2	815	300	1	1
2	815	300	1	2
2	815	300	1.5	3
2	815	300	2	4
2	815	300	2	5
2	815	300	2	6
2	913	300	0.5	1
2	913	300	1	2
2	913	300	0.5	3
2	913	300	0.5	4
2	913	300	0.5	5
2	913	300	0.5	6
12	813	300	1.5	1
12	813	300	1.5	2
12	813	300	2.5	3
12	813	300	3	4
12	813	300	2.75	5
12	813	300	2.5	6
12	913	300	1.25	1
12	913	300	1	2
12	913	300	2	3
12	913	300	2	4
12	913	300	2	5
12	913	300	1.5	6
12	960	300	1	1
12	960	300	1	2
12	960	300	1.5	3
12	960	300	1.5	4
12	960	300	1.5	5
12	960	300	1.75	6
12	974	300	0.75	1
12	974	300	1	2
12	974	300	1	3
12	974	300	1.2	4
12	974	300	1.4	5
12	974	300	1.15	6
12	1029	300	0.5	1
12	1029	300	1.1	2
12	1029	300	0.8	3
12	1029	300	1	4
12	1029	300	1.1	5
12	1029	300	1.2	6
42	889	300	0.5	1
42	889	300	0.25	2
42	889	300	0	3
42	889	300	0	4
42	889	300	0	5
42	889	300	0.1	6
42	896	300	0.25	1
42	896	300	0.5	2
42	896	300	0.25	3
42	896	300	1	4
42	896	300	0.25	5
42	896	300	0	6
49	826	300	1	1
49	826	300	1	2
49	826	300	1	3
49	826	300	0.5	4
49	826	300	0.5	5
49	826	300	1.5	6
63	826	300	2	1
63	826	300	1	2
63	826	300	1.5	3
63	826	300	1.5	4
63	826	300	1.75	5
63	826	300	1	6
63	889	300	0.5	1
63	889	300	0.5	2
63	889	300	1	3
63	889	300	1	4
63	889	300	1	5
63	889	300	1	6
63	896	300	1	1
63	896	300	1	2
63	896	300	1	3
63	896	300	1.5	4
63	896	300	1	5
63	896	300	1	6

## Sheet: IFP
Electrode #	Post-implant day	Frequency (Hz)	Response	Block
14	889	20	2	1
14	889	20	4	2
14	889	20	4.25	3
14	889	20	2	4
14	889	20	2	5
14	889	20	2	6
14	896	20	1	1
14	896	20	1	2
14	896	20	1	3
14	896	20	1	4
14	896	20	2	5
14	896	20	1	6
16	939	20	1	1
16	939	20	0.5	2
16	939	20	1	3
16	939	20	2.25	4
16	939	20	1	5
16	939	20	1	6
19	813	20	3	1
19	813	20	2	2
19	813	20	3	3
19	813	20	2.75	4
19	813	20	2	5
19	813	20	2.5	6
19	815	20	1.75	1
19	815	20	2.5	2
19	815	20	2	3
19	815	20	2.5	4
19	815	20	2	5
19	815	20	2.25	6
19	913	20	0	1
19	913	20	1	2
19	913	20	1	3
19	913	20	1	4
19	913	20	1.5	5
19	913	20	1	6
19	960	20	0.75	1
19	960	20	1	2
19	960	20	0.75	3
19	960	20	1	4
19	960	20	0.75	5
19	960	20	0.75	6
19	976	20	0.75	1
19	976	20	0.75	2
19	976	20	0.5	3
19	976	20	1	4
19	976	20	1	5
19	976	20	1	6
22	813	20	0.5	1
22	813	20	1	2
22	813	20	1	3
22	813	20	3	4
22	813	20	2	5
22	813	20	2.5	6
22	913	20	0.5	1
22	913	20	0.5	2
22	913	20	1.75	3
22	913	20	1	4
22	913	20	1	5
22	913	20	1	6
22	960	20	0.5	1
22	960	20	0.25	2
22	960	20	0.75	3
22	960	20	1	4
22	960	20	1	5
22	960	20	0.75	6
22	974	20	0.2	1
22	974	20	0.3	2
22	974	20	0.75	3
22	974	20	0.75	4
22	974	20	1.2	5
22	974	20	1	6
22	1029	20	0.4	1
22	1029	20	0.3	2
22	1029	20	0.5	3
22	1029	20	0.8	4
22	1029	20	0.9	5
22	1029	20	1.1	6
26	939	20	0.5	1
26	939	20	1	2
26	939	20	1	3
26	939	20	1.5	4
26	939	20	1.5	5
26	939	20	1.5	6
54	813	20	1.75	1
54	813	20	2.5	2
54	813	20	1.75	3
54	813	20	2.5	4
54	813	20	3	5
54	813	20	2.25	6
58	826	20	2	1
58	826	20	2.5	2
58	826	20	1	3
58	826	20	2	4
58	826	20	2	5
58	826	20	2.5	6
14	889	40	3	1
14	889	40	3.75	2
14	889	40	4.25	3
14	889	40	3.5	4
14	889	40	3.5	5
14	889	40	3.75	6
14	896	40	1	1
14	896	40	1.25	2
14	896	40	1.5	3
14	896	40	2	4
14	896	40	2	5
14	896	40	2	6
16	939	40	2	1
16	939	40	1.5	2
16	939	40	1.5	3
16	939	40	2.5	4
16	939	40	2.5	5
16	939	40	2	6
19	813	40	3	1
19	813	40	3	2
19	813	40	4	3
19	813	40	4	4
19	813	40	4.5	5
19	813	40	4	6
19	815	40	2	1
19	815	40	2.5	2
19	815	40	2.25	3
19	815	40	3	4
19	815	40	2.75	5
19	815	40	3	6
19	913	40	2	1
19	913	40	2	2
19	913	40	2.5	3
19	913	40	2	4
19	913	40	3	5
19	913	40	3	6
19	960	40	1.5	1
19	960	40	1.5	2
19	960	40	1.5	3
19	960	40	1.75	4
19	960	40	1.5	5
19	960	40	1.75	6
19	976	40	0.75	1
19	976	40	1.15	2
19	976	40	1.75	3
19	976	40	1.75	4
19	976	40	2.25	5
19	976	40	1.75	6
22	813	40	1.5	1
22	813	40	2	2
22	813	40	2	3
22	813	40	3	4
22	813	40	3	5
22	813	40	2.5	6
22	913	40	1	1
22	913	40	1.5	2
22	913	40	2	3
22	913	40	1.5	4
22	913	40	2	5
22	913	40	2	6
22	960	40	1	1
22	960	40	1.25	2
22	960	40	1.4	3
22	960	40	1.6	4
22	960	40	2	5
22	960	40	1.6	6
22	974	40	1	1
22	974	40	1	2
22	974	40	1	3
22	974	40	1.25	4
22	974	40	1.25	5
22	974	40	1.2	6
22	1029	40	0.5	1
22	1029	40	0.4	2
22	1029	40	0.75	3
22	1029	40	1.1	4
22	1029	40	1.1	5
22	1029	40	1.25	6
26	939	40	1.5	1
26	939	40	1.5	2
26	939	40	2.25	3
26	939	40	2.5	4
26	939	40	2.25	5
26	939	40	2.5	6
54	813	40	3.5	1
54	813	40	2.5	2
54	813	40	2.5	3
54	813	40	3	4
54	813	40	3.5	5
54	813	40	3	6
58	826	40	2.5	1
58	826	40	2.5	2
58	826	40	2.75	3
58	826	40	3	4
58	826	40	2.5	5
58	826	40	3	6
14	889	60	2.5	1
14	889	60	3	2
14	889	60	4.5	3
14	889	60	3.5	4
14	889	60	3	5
14	889	60	3.5	6
14	896	60	1	1
14	896	60	1	2
14	896	60	1.5	3
14	896	60	2	4
14	896	60	2	5
14	896	60	2	6
16	939	60	1	1
16	939	60	0.75	2
16	939	60	2	3
16	939	60	2	4
16	939	60	2.5	5
16	939	60	1.5	6
19	813	60	4	1
19	813	60	4	2
19	813	60	4.5	3
19	813	60	4	4
19	813	60	4	5
19	813	60	3.5	6
19	815	60	2.25	1
19	815	60	3	2
19	815	60	3	3
19	815	60	3	4
19	815	60	3	5
19	815	60	3	6
19	913	60	2.5	1
19	913	60	1.5	2
19	913	60	2	3
19	913	60	1.5	4
19	913	60	2.5	5
19	913	60	1.5	6
19	960	60	1.25	1
19	960	60	1.25	2
19	960	60	1.75	3
19	960	60	1.75	4
19	960	60	1.5	5
19	960	60	1.5	6
19	976	60	2	1
19	976	60	3	2
19	976	60	1.4	3
19	976	60	2.25	4
19	976	60	2	5
19	976	60	2	6
22	813	60	1.5	1
22	813	60	2	2
22	813	60	2	3
22	813	60	3.5	4
22	813	60	3.5	5
22	813	60	2.75	6
22	913	60	2	1
22	913	60	1.5	2
22	913	60	2.25	3
22	913	60	2	4
22	913	60	2	5
22	913	60	2.5	6
22	960	60	1.25	1
22	960	60	1.25	2
22	960	60	1.6	3
22	960	60	1.75	4
22	960	60	1.75	5
22	960	60	1.75	6
22	974	60	1	1
22	974	60	0.75	2
22	974	60	1.25	3
22	974	60	1.25	4
22	974	60	1.5	5
22	974	60	1.3	6
22	1029	60	0.75	1
22	1029	60	1	2
22	1029	60	0.6	3
22	1029	60	1.2	4
22	1029	60	1.1	5
22	1029	60	1.25	6
26	939	60	1.5	1
26	939	60	1.5	2
26	939	60	1.5	3
26	939	60	2.5	4
26	939	60	2	5
26	939	60	2.5	6
54	813	60	2	1
54	813	60	2.5	2
54	813	60	1.5	3
54	813	60	2.5	4
54	813	60	3	5
54	813	60	4	6
58	826	60	2.5	1
58	826	60	2	2
58	826	60	2	3
58	826	60	3	4
58	826	60	3	5
58	826	60	3	6
14	889	80	2	1
14	889	80	3.5	2
14	889	80	4	3
14	889	80	3.5	4
14	889	80	3.25	5
14	889	80	3	6
14	896	80	1	1
14	896	80	1	2
14	896	80	1.5	3
14	896	80	1.75	4
14	896	80	2	5
14	896	80	2	6
16	939	80	2	1
16	939	80	1	2
16	939	80	1	3
16	939	80	1.5	4
16	939	80	2	5
16	939	80	1.5	6
19	813	80	3.5	1
19	813	80	3	2
19	813	80	4.5	3
19	813	80	3.5	4
19	813	80	4	5
19	813	80	4	6
19	815	80	2.25	1
19	815	80	2.5	2
19	815	80	3	3
19	815	80	3	4
19	815	80	2	5
19	815	80	3	6
19	913	80	2.25	1
19	913	80	2	2
19	913	80	2.5	3
19	913	80	2	4
19	913	80	2	5
19	913	80	1.5	6
19	960	80	1.25	1
19	960	80	2	2
19	960	80	1.75	3
19	960	80	1.5	4
19	960	80	1.6	5
19	960	80	1.6	6
19	976	80	1.5	1
19	976	80	1.75	2
19	976	80	0.75	3
19	976	80	1.75	4
19	976	80	2	5
19	976	80	2.5	6
22	813	80	2	1
22	813	80	2	2
22	813	80	2	3
22	813	80	3	4
22	813	80	3	5
22	813	80	2.5	6
22	913	80	2	1
22	913	80	1.5	2
22	913	80	1.75	3
22	913	80	1.5	4
22	913	80	2.25	5
22	913	80	2	6
22	960	80	1	1
22	960	80	1.4	2
22	960	80	1.5	3
22	960	80	1.75	4
22	960	80	2	5
22	960	80	2	6
22	974	80	1	1
22	974	80	0.8	2
22	974	80	1.25	3
22	974	80	1.2	4
22	974	80	1.5	5
22	974	80	1.2	6
22	1029	80	0.6	1
22	1029	80	1	2
22	1029	80	1	3
22	1029	80	1.25	4
22	1029	80	1	5
22	1029	80	1.3	6
26	939	80	1.5	1
26	939	80	1.5	2
26	939	80	1.5	3
26	939	80	2.5	4
26	939	80	2	5
26	939	80	2.5	6
54	813	80	1.5	1
54	813	80	2	2
54	813	80	2	3
54	813	80	2.5	4
54	813	80	2.5	5
54	813	80	3	6
58	826	80	2.5	1
58	826	80	2.5	2
58	826	80	2	3
58	826	80	3	4
58	826	80	2.5	5
58	826	80	3	6
14	889	100	2	1
14	889	100	3.5	2
14	889	100	4.5	3
14	889	100	3.25	4
14	889	100	3.5	5
14	889	100	3	6
14	896	100	0.75	1
14	896	100	1	2
14	896	100	1.5	3
14	896	100	1.5	4
14	896	100	1.5	5
14	896	100	2	6
16	939	100	1.5	1
16	939	100	1.5	2
16	939	100	1.5	3
16	939	100	2	4
16	939	100	2.25	5
16	939	100	2	6
19	813	100	2	1
19	813	100	2	2
19	813	100	3	3
19	813	100	4	4
19	813	100	3	5
19	813	100	3.5	6
19	815	100	2	1
19	815	100	3	2
19	815	100	3	3
19	815	100	2.5	4
19	815	100	3	5
19	815	100	2.75	6
19	913	100	2	1
19	913	100	1.5	2
19	913	100	2	3
19	913	100	2.5	4
19	913	100	2	5
19	913	100	2.5	6
19	960	100	1.5	1
19	960	100	2	2
19	960	100	1.75	3
19	960	100	1.5	4
19	960	100	1.75	5
19	960	100	1.5	6
19	976	100	1	1
19	976	100	1.5	2
19	976	100	1.5	3
19	976	100	1.25	4
19	976	100	2	5
19	976	100	1.75	6
22	813	100	2	1
22	813	100	2.5	2
22	813	100	2	3
22	813	100	3	4
22	813	100	3	5
22	813	100	2.5	6
22	913	100	2	1
22	913	100	0.75	2
22	913	100	2	3
22	913	100	2	4
22	913	100	2	5
22	913	100	2.25	6
22	960	100	1.25	1
22	960	100	1.4	2
22	960	100	1.5	3
22	960	100	1.75	4
22	960	100	1.75	5
22	960	100	1.6	6
22	974	100	0.75	1
22	974	100	1	2
22	974	100	1.25	3
22	974	100	1.2	4
22	974	100	1.25	5
22	974	100	1.3	6
22	1029	100	0.7	1
22	1029	100	1.1	2
22	1029	100	0.75	3
22	1029	100	1.2	4
22	1029	100	1.2	5
22	1029	100	1.25	6
26	939	100	2	1
26	939	100	1	2
26	939	100	1.5	3
26	939	100	2.25	4
26	939	100	2.25	5
26	939	100	2.25	6
54	813	100	1.5	1
54	813	100	1.5	2
54	813	100	2	3
54	813	100	1.5	4
54	813	100	2	5
54	813	100	3	6
58	826	100	1.5	1
58	826	100	2.5	2
58	826	100	1.5	3
58	826	100	2.5	4
58	826	100	2.75	5
58	826	100	3	6
14	889	150	1	1
14	889	150	3	2
14	889	150	3.5	3
14	889	150	3	4
14	889	150	3	5
14	889	150	3.5	6
14	896	150	1	1
14	896	150	1	2
14	896	150	1.5	3
14	896	150	1.5	4
14	896	150	2	5
14	896	150	1.5	6
16	939	150	2	1
16	939	150	1	2
16	939	150	1.5	3
16	939	150	2	4
16	939	150	2	5
16	939	150	1.5	6
19	813	150	3	1
19	813	150	2.5	2
19	813	150	4.25	3
19	813	150	3.5	4
19	813	150	3	5
19	813	150	2.5	6
19	815	150	2	1
19	815	150	2	2
19	815	150	2.5	3
19	815	150	2.5	4
19	815	150	2.75	5
19	815	150	2.75	6
19	913	150	2	1
19	913	150	2.5	2
19	913	150	2	3
19	913	150	2	4
19	913	150	2	5
19	913	150	2	6
19	960	150	1.5	1
19	960	150	2	2
19	960	150	1.6	3
19	960	150	1.5	4
19	960	150	1.25	5
19	960	150	1.75	6
19	976	150	1.5	1
19	976	150	1.75	2
19	976	150	1.5	3
19	976	150	1.5	4
19	976	150	1	5
19	976	150	1.75	6
22	813	150	2	1
22	813	150	1.5	2
22	813	150	2	3
22	813	150	3	4
22	813	150	3	5
22	813	150	2	6
22	913	150	2	1
22	913	150	1.5	2
22	913	150	2.25	3
22	913	150	1	4
22	913	150	2.5	5
22	913	150	1.5	6
22	960	150	1.25	1
22	960	150	1.25	2
22	960	150	1.25	3
22	960	150	1.75	4
22	960	150	1.25	5
22	960	150	1.5	6
22	974	150	1	1
22	974	150	1.2	2
22	974	150	1.25	3
22	974	150	1.2	4
22	974	150	1.4	5
22	974	150	1.15	6
22	1029	150	0.75	1
22	1029	150	1	2
22	1029	150	0.8	3
22	1029	150	1.1	4
22	1029	150	0.9	5
22	1029	150	1.2	6
26	939	150	2	1
26	939	150	2	2
26	939	150	1.5	3
26	939	150	2	4
26	939	150	2	5
26	939	150	2.25	6
54	813	150	1.5	1
54	813	150	1	2
54	813	150	1	3
54	813	150	1	4
54	813	150	1.25	5
54	813	150	2	6
58	826	150	1.5	1
58	826	150	2.5	2
58	826	150	2.5	3
58	826	150	2.5	4
58	826	150	2	5
58	826	150	2.75	6
14	889	200	1	1
14	889	200	3.5	2
14	889	200	3	3
14	889	200	3	4
14	889	200	3.25	5
14	889	200	2.5	6
14	896	200	1	1
14	896	200	1	2
14	896	200	1	3
14	896	200	1	4
14	896	200	1.5	5
14	896	200	1.5	6
16	939	200	1	1
16	939	200	1	2
16	939	200	1	3
16	939	200	2	4
16	939	200	2	5
16	939	200	1.5	6
19	813	200	2.5	1
19	813	200	2	2
19	813	200	3	3
19	813	200	3	4
19	813	200	3	5
19	813	200	2.5	6
19	815	200	2	1
19	815	200	2.5	2
19	815	200	3	3
19	815	200	2.5	4
19	815	200	2.5	5
19	815	200	3	6
19	913	200	1	1
19	913	200	1.5	2
19	913	200	2.5	3
19	913	200	2	4
19	913	200	2.5	5
19	913	200	1	6
19	960	200	1.25	1
19	960	200	2	2
19	960	200	1.75	3
19	960	200	1.5	4
19	960	200	1.75	5
19	960	200	1.6	6
19	976	200	0.75	1
19	976	200	1.25	2
19	976	200	1.25	3
19	976	200	1.25	4
19	976	200	1	5
19	976	200	1.25	6
22	813	200	2	1
22	813	200	2	2
22	813	200	2	3
22	813	200	3.5	4
22	813	200	3	5
22	813	200	2	6
22	913	200	1	1
22	913	200	1	2
22	913	200	2.5	3
22	913	200	1.5	4
22	913	200	1.75	5
22	913	200	2	6
22	960	200	1.25	1
22	960	200	1	2
22	960	200	1.5	3
22	960	200	1.75	4
22	960	200	1.5	5
22	960	200	1.25	6
22	974	200	1	1
22	974	200	1	2
22	974	200	1.25	3
22	974	200	1	4
22	974	200	1.2	5
22	974	200	1.2	6
22	1029	200	0.75	1
22	1029	200	0.8	2
22	1029	200	0.7	3
22	1029	200	1.1	4
22	1029	200	1.2	5
22	1029	200	1.25	6
26	939	200	2.25	1
26	939	200	2	2
26	939	200	1.5	3
26	939	200	2.25	4
26	939	200	1.75	5
26	939	200	2	6
54	813	200	1.5	1
54	813	200	1.5	2
54	813	200	1.5	3
54	813	200	1.75	4
54	813	200	1	5
54	813	200	2.5	6
58	826	200	2	1
58	826	200	2	2
58	826	200	1.5	3
58	826	200	2.5	4
58	826	200	2.5	5
58	826	200	2.5	6
14	889	250	1	1
14	889	250	1.5	2
14	889	250	3	3
14	889	250	2.5	4
14	889	250	3	5
14	889	250	2	6
14	896	250	1	1
14	896	250	1.25	2
14	896	250	1	3
14	896	250	1.5	4
14	896	250	2	5
14	896	250	1	6
16	939	250	1.5	1
16	939	250	0.5	2
16	939	250	1	3
16	939	250	2	4
16	939	250	2	5
16	939	250	2	6
19	813	250	2.5	1
19	813	250	2.5	2
19	813	250	3	3
19	813	250	3	4
19	813	250	2.5	5
19	813	250	3.5	6
19	815	250	2	1
19	815	250	2	2
19	815	250	3	3
19	815	250	2.5	4
19	815	250	2.5	5
19	815	250	2.5	6
19	913	250	2	1
19	913	250	2.5	2
19	913	250	1.5	3
19	913	250	1.5	4
19	913	250	1.5	5
19	913	250	1	6
19	960	250	1.5	1
19	960	250	1.5	2
19	960	250	1.25	3
19	960	250	1.5	4
19	960	250	1.5	5
19	960	250	1.5	6
19	976	250	1.5	1
19	976	250	1.5	2
19	976	250	1.5	3
19	976	250	1.75	4
19	976	250	1.5	5
19	976	250	1.5	6
22	813	250	2	1
22	813	250	2.5	2
22	813	250	2	3
22	813	250	2.5	4
22	813	250	2	5
22	813	250	2.5	6
22	913	250	2	1
22	913	250	1.5	2
22	913	250	2	3
22	913	250	1	4
22	913	250	2	5
22	913	250	1.5	6
22	960	250	1	1
22	960	250	1.4	2
22	960	250	1.5	3
22	960	250	1.25	4
22	960	250	1.6	5
22	960	250	1.5	6
22	974	250	1	1
22	974	250	1	2
22	974	250	1.2	3
22	974	250	1.2	4
22	974	250	1.2	5
22	974	250	1.2	6
22	1029	250	0.75	1
22	1029	250	1	2
22	1029	250	0.8	3
22	1029	250	1.1	4
22	1029	250	1	5
22	1029	250	1.2	6
26	939	250	1.5	1
26	939	250	2	2
26	939	250	1.5	3
26	939	250	2.25	4
26	939	250	2	5
26	939	250	2	6
54	813	250	1.5	1
54	813	250	1.5	2
54	813	250	1	3
54	813	250	1	4
54	813	250	1	5
54	813	250	2	6
58	826	250	1	1
58	826	250	2	2
58	826	250	1.5	3
58	826	250	2.5	4
58	826	250	2	5
58	826	250	2.5	6
14	889	300	2.5	1
14	889	300	2	2
14	889	300	3.5	3
14	889	300	2.5	4
14	889	300	3	5
14	889	300	3	6
14	896	300	1	1
14	896	300	1	2
14	896	300	1	3
14	896	300	1	4
14	896	300	2	5
14	896	300	1.5	6
16	939	300	1.5	1
16	939	300	1	2
16	939	300	1.5	3
16	939	300	2.5	4
16	939	300	2	5
16	939	300	2	6
19	813	300	2	1
19	813	300	3	2
19	813	300	3	3
19	813	300	3	4
19	813	300	2.5	5
19	813	300	2.5	6
19	815	300	2	1
19	815	300	2	2
19	815	300	2.5	3
19	815	300	3	4
19	815	300	2.25	5
19	815	300	2.5	6
19	913	300	1	1
19	913	300	2	2
19	913	300	1.5	3
19	913	300	2.25	4
19	913	300	1	5
19	913	300	2	6
19	960	300	1.25	1
19	960	300	1.75	2
19	960	300	1.5	3
19	960	300	1.4	4
19	960	300	1	5
19	960	300	1.75	6
19	976	300	1.25	1
19	976	300	1.5	2
19	976	300	1.4	3
19	976	300	1.15	4
19	976	300	2	5
19	976	300	2	6
22	813	300	1.5	1
22	813	300	1.5	2
22	813	300	2.5	3
22	813	300	3	4
22	813	300	2.75	5
22	813	300	2.5	6
22	913	300	1.25	1
22	913	300	1	2
22	913	300	2	3
22	913	300	2	4
22	913	300	2	5
22	913	300	1.5	6
22	960	300	1	1
22	960	300	1	2
22	960	300	1.5	3
22	960	300	1.5	4
22	960	300	1.5	5
22	960	300	1.75	6
22	974	300	0.75	1
22	974	300	1	2
22	974	300	1	3
22	974	300	1.2	4
22	974	300	1.4	5
22	974	300	1.15	6
22	1029	300	0.5	1
22	1029	300	1.1	2
22	1029	300	0.8	3
22	1029	300	1	4
22	1029	300	1.1	5
22	1029	300	1.2	6
26	939	300	2	1
26	939	300	2	2
26	939	300	2	3
26	939	300	2.25	4
26	939	300	2	5
26	939	300	2.25	6
54	813	300	2	1
54	813	300	1	2
54	813	300	2	3
54	813	300	2	4
54	813	300	1	5
54	813	300	2.5	6
58	826	300	1	1
58	826	300	2	2
58	826	300	1.5	3
58	826	300	2	4
58	826	300	2.75	5
58	826	300	2.5	6

## Sheet: HFP
Electrode #	Post-implant day	Frequency (Hz)	Response	Block
3	826	20	0.5	1
3	826	20	0.5	2
3	826	20	0.75	3
3	826	20	0.5	4
3	826	20	0.25	5
3	826	20	0.5	6
3	889	20	0.5	1
3	889	20	0.25	2
3	889	20	0.25	3
3	889	20	0.25	4
3	889	20	0.75	5
3	889	20	0.5	6
3	896	20	0.25	1
3	896	20	0.1	2
3	896	20	0.1	3
3	896	20	0.1	4
3	896	20	0.75	5
3	896	20	0.5	6
3	913	20	0.25	1
3	913	20	0	2
3	913	20	0	3
3	913	20	0.1	4
3	913	20	0.1	5
3	913	20	0	6
3	960	20	0.1	1
3	960	20	0.3	2
3	960	20	0.05	3
3	960	20	0.05	4
3	960	20	0.2	5
3	960	20	0.2	6
3	976	20	0.3	1
3	976	20	0.1	2
3	976	20	0.3	3
3	976	20	0.1	4
3	976	20	0.025	5
3	976	20	0.075	6
8	826	20	0	1
8	826	20	0.25	2
8	826	20	0	3
8	826	20	0	4
8	826	20	0	5
8	826	20	0	6
13	939	20	0	1
13	939	20	0	2
13	939	20	0	3
13	939	20	0	4
13	939	20	0	5
13	939	20	0	6
20	945	20	0.5	1
20	945	20	0.25	2
20	945	20	0.25	3
20	945	20	0.1	4
20	945	20	0.1	5
20	945	20	0.1	6
34	939	20	0.1	1
34	939	20	0	2
34	939	20	0.1	3
34	939	20	0.1	4
34	939	20	0	5
34	939	20	0.1	6
36	913	20	0	1
36	913	20	0.1	2
36	913	20	0	3
36	913	20	0	4
36	913	20	0	5
36	913	20	0.1	6
36	813	20	0.5	1
36	813	20	0	2
36	813	20	0.25	3
36	813	20	0.25	4
36	813	20	0.25	5
36	813	20	0.25	6
36	815	20	0	1
36	815	20	0	2
36	815	20	0	3
36	815	20	0	4
36	815	20	0	5
36	815	20	0	6
41	813	20	0	1
41	813	20	0	2
41	813	20	0	3
41	813	20	0	4
41	813	20	0	5
41	813	20	0	6
45	939	20	0	1
45	939	20	0	2
45	939	20	0	3
45	939	20	0.1	4
45	939	20	0	5
45	939	20	0	6
3	826	40	1	1
3	826	40	1	2
3	826	40	1	3
3	826	40	0.5	4
3	826	40	0.5	5
3	826	40	0.5	6
3	889	40	0.5	1
3	889	40	0.75	2
3	889	40	0.75	3
3	889	40	0.75	4
3	889	40	0.25	5
3	889	40	0.75	6
3	896	40	0.25	1
3	896	40	0.25	2
3	896	40	0.5	3
3	896	40	0.5	4
3	896	40	1	5
3	896	40	0.5	6
3	913	40	0.5	1
3	913	40	1	2
3	913	40	0.25	3
3	913	40	0.1	4
3	913	40	0.25	5
3	913	40	0.25	6
3	960	40	0.1	1
3	960	40	0.1	2
3	960	40	0.1	3
3	960	40	0.05	4
3	960	40	0.1	5
3	960	40	0.05	6
3	976	40	0.5	1
3	976	40	0.2	2
3	976	40	0.2	3
3	976	40	0.15	4
3	976	40	0.05	5
3	976	40	0.075	6
8	826	40	0.5	1
8	826	40	1	2
8	826	40	0.25	3
8	826	40	0.25	4
8	826	40	0	5
8	826	40	0.25	6
13	939	40	0	1
13	939	40	0.1	2
13	939	40	0	3
13	939	40	0.1	4
13	939	40	0.1	5
13	939	40	0	6
20	945	40	0.1	1
20	945	40	0.5	2
20	945	40	0.1	3
20	945	40	0.25	4
20	945	40	0.25	5
20	945	40	0.25	6
34	939	40	0.25	1
34	939	40	0.1	2
34	939	40	0.1	3
34	939	40	0.25	4
34	939	40	0.15	5
34	939	40	0.1	6
36	913	40	0.25	1
36	913	40	0.1	2
36	913	40	0.1	3
36	913	40	0.25	4
36	913	40	0.1	5
36	913	40	0.1	6
36	813	40	1	1
36	813	40	0.5	2
36	813	40	0	3
36	813	40	0.25	4
36	813	40	0.1	5
36	813	40	0.5	6
36	815	40	0.5	1
36	815	40	0.5	2
36	815	40	1	3
36	815	40	0.5	4
36	815	40	0.5	5
36	815	40	0.5	6
41	813	40	0.25	1
41	813	40	0.25	2
41	813	40	0.1	3
41	813	40	0	4
41	813	40	0.1	5
41	813	40	0.1	6
45	939	40	0	1
45	939	40	0	2
45	939	40	0	3
45	939	40	0	4
45	939	40	0	5
45	939	40	0.25	6
3	826	60	1.5	1
3	826	60	0.5	2
3	826	60	1	3
3	826	60	0.5	4
3	826	60	0.75	5
3	826	60	1	6
3	889	60	1	1
3	889	60	0.5	2
3	889	60	1	3
3	889	60	0.75	4
3	889	60	1	5
3	889	60	1.25	6
3	896	60	0.25	1
3	896	60	0.25	2
3	896	60	0.25	3
3	896	60	1	4
3	896	60	0.5	5
3	896	60	0.5	6
3	913	60	1.25	1
3	913	60	0.1	2
3	913	60	0.5	3
3	913	60	0.1	4
3	913	60	0.5	5
3	913	60	0.25	6
3	960	60	0.5	1
3	960	60	0.2	2
3	960	60	0.2	3
3	960	60	0.1	4
3	960	60	0.025	5
3	960	60	0.05	6
3	976	60	0.5	1
3	976	60	0.2	2
3	976	60	0.3	3
3	976	60	0.3	4
3	976	60	0.05	5
3	976	60	0.05	6
8	826	60	0	1
8	826	60	0.25	2
8	826	60	0	3
8	826	60	0.25	4
8	826	60	0.1	5
8	826	60	0	6
13	939	60	0.1	1
13	939	60	0.05	2
13	939	60	0.05	3
13	939	60	0	4
13	939	60	0	5
13	939	60	0.05	6
20	945	60	1	1
20	945	60	0.5	2
20	945	60	0.5	3
20	945	60	0.5	4
20	945	60	0.25	5
20	945	60	0.4	6
34	939	60	0.25	1
34	939	60	0.1	2
34	939	60	0.25	3
34	939	60	0.25	4
34	939	60	0.1	5
34	939	60	0.25	6
36	913	60	0.5	1
36	913	60	0.1	2
36	913	60	0.5	3
36	913	60	0.1	4
36	913	60	0.1	5
36	913	60	0.1	6
36	813	60	0.5	1
36	813	60	1	2
36	813	60	1	3
36	813	60	0.5	4
36	813	60	0.25	5
36	813	60	0.25	6
36	815	60	0.75	1
36	815	60	0.75	2
36	815	60	1	3
36	815	60	0.5	4
36	815	60	0.5	5
36	815	60	1	6
41	813	60	0.25	1
41	813	60	0	2
41	813	60	0.25	3
41	813	60	0.25	4
41	813	60	0.1	5
41	813	60	0.1	6
45	939	60	0	1
45	939	60	0	2
45	939	60	0	3
45	939	60	0.1	4
45	939	60	0	5
45	939	60	0.25	6
3	826	80	1.5	1
3	826	80	0.5	2
3	826	80	0.75	3
3	826	80	0.75	4
3	826	80	0.5	5
3	826	80	1	6
3	889	80	2	1
3	889	80	0.5	2
3	889	80	0.5	3
3	889	80	1	4
3	889	80	1	5
3	889	80	1	6
3	896	80	0.5	1
3	896	80	0.25	2
3	896	80	0.25	3
3	896	80	0.75	4
3	896	80	1	5
3	896	80	0.5	6
3	913	80	1	1
3	913	80	0.5	2
3	913	80	0.25	3
3	913	80	0.25	4
3	913	80	0.5	5
3	913	80	0.25	6
3	960	80	0.5	1
3	960	80	0.3	2
3	960	80	0.2	3
3	960	80	0.2	4
3	960	80	0.1	5
3	960	80	0.15	6
3	976	80	0.6	1
3	976	80	0.3	2
3	976	80	0.3	3
3	976	80	0.2	4
3	976	80	0.05	5
3	976	80	0.05	6
8	826	80	1	1
8	826	80	0.5	2
8	826	80	0.25	3
8	826	80	0	4
8	826	80	0	5
8	826	80	0.25	6
13	939	80	0.1	1
13	939	80	0.1	2
13	939	80	0.1	3
13	939	80	0.05	4
13	939	80	0.1	5
13	939	80	0.05	6
20	945	80	0.5	1
20	945	80	0.75	2
20	945	80	1	3
20	945	80	0.75	4
20	945	80	0.6	5
20	945	80	0.6	6
34	939	80	0.1	1
34	939	80	0.1	2
34	939	80	0.1	3
34	939	80	0.1	4
34	939	80	0.05	5
34	939	80	0.25	6
36	913	80	0.25	1
36	913	80	0.25	2
36	913	80	0.5	3
36	913	80	0.25	4
36	913	80	0.25	5
36	913	80	0.25	6
36	813	80	2	1
36	813	80	1	2
36	813	80	0.25	3
36	813	80	0.25	4
36	813	80	0.25	5
36	813	80	0.75	6
36	815	80	1	1
36	815	80	0.5	2
36	815	80	0.5	3
36	815	80	0.75	4
36	815	80	0.5	5
36	815	80	0	6
41	813	80	1	1
41	813	80	0.25	2
41	813	80	0.25	3
41	813	80	0.1	4
41	813	80	0.25	5
41	813	80	0.25	6
45	939	80	0.1	1
45	939	80	0.1	2
45	939	80	0.1	3
45	939	80	0	4
45	939	80	0.1	5
45	939	80	0.1	6
3	826	100	1.5	1
3	826	100	1	2
3	826	100	1	3
3	826	100	1	4
3	826	100	0.5	5
3	826	100	0.75	6
3	889	100	2	1
3	889	100	1	2
3	889	100	0.5	3
3	889	100	1	4
3	889	100	1.25	5
3	889	100	1.25	6
3	896	100	1	1
3	896	100	0.5	2
3	896	100	0.25	3
3	896	100	0.5	4
3	896	100	1	5
3	896	100	0.75	6
3	913	100	1	1
3	913	100	0.25	2
3	913	100	0.25	3
3	913	100	0.5	4
3	913	100	0.75	5
3	913	100	0.5	6
3	960	100	0.5	1
3	960	100	0.4	2
3	960	100	0.1	3
3	960	100	0.3	4
3	960	100	0.2	5
3	960	100	0.1	6
3	976	100	0.6	1
3	976	100	0.5	2
3	976	100	0.4	3
3	976	100	0.2	4
3	976	100	0.1	5
3	976	100	0.05	6
8	826	100	1	1
8	826	100	1	2
8	826	100	0.5	3
8	826	100	0.25	4
8	826	100	0.5	5
8	826	100	0.25	6
13	939	100	0.2	1
13	939	100	0.1	2
13	939	100	0.05	3
13	939	100	0	4
13	939	100	0.05	5
13	939	100	0.05	6
20	945	100	1	1
20	945	100	0.75	2
20	945	100	0.5	3
20	945	100	0.6	4
20	945	100	0.25	5
20	945	100	0.5	6
34	939	100	0.25	1
34	939	100	0.1	2
34	939	100	0.05	3
34	939	100	0.1	4
34	939	100	0.1	5
34	939	100	0.25	6
36	913	100	0.5	1
36	913	100	0.25	2
36	913	100	0.75	3
36	913	100	0.25	4
36	913	100	0.1	5
36	913	100	0.1	6
36	813	100	0.5	1
36	813	100	0.75	2
36	813	100	0.5	3
36	813	100	0.5	4
36	813	100	0.25	5
36	813	100	1	6
36	815	100	0.5	1
36	815	100	0.5	2
36	815	100	0.5	3
36	815	100	0.75	4
36	815	100	0.75	5
36	815	100	0.5	6
41	813	100	0.5	1
41	813	100	0.25	2
41	813	100	0.1	3
41	813	100	0.5	4
41	813	100	0.1	5
41	813	100	0.25	6
45	939	100	0.25	1
45	939	100	0.1	2
45	939	100	0.1	3
45	939	100	0.1	4
45	939	100	0.1	5
45	939	100	0	6
3	826	150	1.75	1
3	826	150	1	2
3	826	150	1	3
3	826	150	0.75	4
3	826	150	0.5	5
3	826	150	1	6
3	889	150	1.5	1
3	889	150	0.5	2
3	889	150	0.75	3
3	889	150	1	4
3	889	150	0.75	5
3	889	150	1.25	6
3	896	150	0.5	1
3	896	150	0.25	2
3	896	150	0.25	3
3	896	150	1	4
3	896	150	1	5
3	896	150	1	6
3	913	150	1	1
3	913	150	0.25	2
3	913	150	1	3
3	913	150	0.2	4
3	913	150	0.5	5
3	913	150	0.75	6
3	960	150	0.5	1
3	960	150	0.5	2
3	960	150	0.2	3
3	960	150	0.2	4
3	960	150	0.3	5
3	960	150	0.2	6
3	976	150	0.6	1
3	976	150	0.4	2
3	976	150	0.4	3
3	976	150	0.3	4
3	976	150	0.3	5
3	976	150	0.15	6
8	826	150	1	1
8	826	150	1	2
8	826	150	0.75	3
8	826	150	0	4
8	826	150	0.5	5
8	826	150	0	6
13	939	150	0.5	1
13	939	150	0.25	2
13	939	150	0.05	3
13	939	150	0.1	4
13	939	150	0.05	5
13	939	150	0.1	6
20	945	150	1	1
20	945	150	0.75	2
20	945	150	0.5	3
20	945	150	0.25	4
20	945	150	0.75	5
20	945	150	0.5	6
34	939	150	0.1	1
34	939	150	0.25	2
34	939	150	0.25	3
34	939	150	0.25	4
34	939	150	0.25	5
34	939	150	0.1	6
36	913	150	0.5	1
36	913	150	0.25	2
36	913	150	1	3
36	913	150	0.5	4
36	913	150	0.75	5
36	913	150	0.5	6
36	813	150	1.5	1
36	813	150	1	2
36	813	150	1	3
36	813	150	0.5	4
36	813	150	0.5	5
36	813	150	0.5	6
36	815	150	1	1
36	815	150	1	2
36	815	150	1	3
36	815	150	1	4
36	815	150	1	5
36	815	150	1	6
41	813	150	0.25	1
41	813	150	0.25	2
41	813	150	0.25	3
41	813	150	0.1	4
41	813	150	0.25	5
41	813	150	0.1	6
45	939	150	0.25	1
45	939	150	0.25	2
45	939	150	0.1	3
45	939	150	0.1	4
45	939	150	0.1	5
45	939	150	0.1	6
3	826	200	1.5	1
3	826	200	1	2
3	826	200	1	3
3	826	200	1	4
3	826	200	0.75	5
3	826	200	1	6
3	889	200	1.5	1
3	889	200	0.5	2
3	889	200	0.75	3
3	889	200	0.75	4
3	889	200	1.25	5
3	889	200	1.25	6
3	896	200	1	1
3	896	200	0.25	2
3	896	200	0.25	3
3	896	200	0.5	4
3	896	200	1	5
3	896	200	1	6
3	913	200	1.25	1
3	913	200	0.25	2
3	913	200	0.75	3
3	913	200	0.5	4
3	913	200	0.5	5
3	913	200	0.5	6
3	960	200	0.75	1
3	960	200	0.4	2
3	960	200	0.2	3
3	960	200	0.3	4
3	960	200	0.3	5
3	960	200	0.2	6
3	976	200	0.5	1
3	976	200	0.5	2
3	976	200	0.4	3
3	976	200	0.2	4
3	976	200	0.3	5
3	976	200	0.1	6
8	826	200	0.5	1
8	826	200	1	2
8	826	200	0.5	3
8	826	200	0.25	4
8	826	200	0.5	5
8	826	200	0	6
13	939	200	0.2	1
13	939	200	0.25	2
13	939	200	0.15	3
13	939	200	0.1	4
13	939	200	0.05	5
13	939	200	0.05	6
20	945	200	1.1	1
20	945	200	0.75	2
20	945	200	0.75	3
20	945	200	0.75	4
20	945	200	0.25	5
20	945	200	0.3	6
34	939	200	0.25	1
34	939	200	0.25	2
34	939	200	0.25	3
34	939	200	0.25	4
34	939	200	0.15	5
34	939	200	0.25	6
36	913	200	1	1
36	913	200	0.5	2
36	913	200	0.5	3
36	913	200	0.5	4
36	913	200	0	5
36	913	200	0.25	6
36	813	200	1	1
36	813	200	1	2
36	813	200	1.5	3
36	813	200	1	4
36	813	200	0.5	5
36	813	200	1	6
36	815	200	1	1
36	815	200	1	2
36	815	200	1	3
36	815	200	1	4
36	815	200	1.5	5
36	815	200	1	6
41	813	200	1	1
41	813	200	0.25	2
41	813	200	0.25	3
41	813	200	0.25	4
41	813	200	0.25	5
41	813	200	0.5	6
45	939	200	1	1
45	939	200	0.25	2
45	939	200	0.1	3
45	939	200	0.1	4
45	939	200	0.25	5
45	939	200	0.1	6
3	826	250	1.5	1
3	826	250	1	2
3	826	250	1	3
3	826	250	1	4
3	826	250	0.75	5
3	826	250	0.75	6
3	889	250	1.5	1
3	889	250	1.75	2
3	889	250	0.5	3
3	889	250	0.75	4
3	889	250	0.5	5
3	889	250	1	6
3	896	250	0.75	1
3	896	250	0.5	2
3	896	250	0.5	3
3	896	250	0.5	4
3	896	250	1	5
3	896	250	1	6
3	913	250	1.5	1
3	913	250	1	2
3	913	250	1	3
3	913	250	0.25	4
3	913	250	0.5	5
3	913	250	0.25	6
3	960	250	0.75	1
3	960	250	0.4	2
3	960	250	0.2	3
3	960	250	0.2	4
3	960	250	0.3	5
3	960	250	0.1	6
3	976	250	0.5	1
3	976	250	0.5	2
3	976	250	0.5	3
3	976	250	0.2	4
3	976	250	0.075	5
3	976	250	0.15	6
8	826	250	0.5	1
8	826	250	1	2
8	826	250	0.25	3
8	826	250	0.25	4
8	826	250	0.25	5
8	826	250	0.25	6
13	939	250	0.5	1
13	939	250	0.25	2
13	939	250	0.3	3
13	939	250	0.05	4
13	939	250	0.05	5
13	939	250	0.05	6
20	945	250	1.1	1
20	945	250	1	2
20	945	250	0.75	3
20	945	250	0.5	4
20	945	250	0.4	5
20	945	250	0.5	6
34	939	250	0.5	1
34	939	250	0.25	2
34	939	250	0.25	3
34	939	250	0.25	4
34	939	250	0.25	5
34	939	250	0.25	6
36	913	250	0.75	1
36	913	250	0.25	2
36	913	250	0.75	3
36	913	250	0.75	4
36	913	250	0.25	5
36	913	250	0.25	6
36	813	250	1	1
36	813	250	1	2
36	813	250	1	3
36	813	250	0.5	4
36	813	250	0.1	5
36	813	250	0.75	6
36	815	250	1	1
36	815	250	1	2
36	815	250	1	3
36	815	250	1	4
36	815	250	1.5	5
36	815	250	1.5	6
41	813	250	0.5	1
41	813	250	0.25	2
41	813	250	0.25	3
41	813	250	0.25	4
41	813	250	0.1	5
41	813	250	0.1	6
45	939	250	0.5	1
45	939	250	0.25	2
45	939	250	0.25	3
45	939	250	0.25	4
45	939	250	0.25	5
45	939	250	0.1	6
3	826	300	1.75	1
3	826	300	1	2
3	826	300	1	3
3	826	300	0.5	4
3	826	300	1	5
3	826	300	1	6
3	889	300	1.5	1
3	889	300	1.5	2
3	889	300	0.75	3
3	889	300	1	4
3	889	300	1.5	5
3	889	300	1	6
3	896	300	0.75	1
3	896	300	0.5	2
3	896	300	0.5	3
3	896	300	0.75	4
3	896	300	1	5
3	896	300	0.75	6
3	913	300	1	1
3	913	300	1	2
3	913	300	0.5	3
3	913	300	0.5	4
3	913	300	1	5
3	913	300	0.5	6
3	960	300	0.6	1
3	960	300	0.3	2
3	960	300	0.25	3
3	960	300	0.3	4
3	960	300	0.2	5
3	960	300	0.15	6
3	976	300	0.4	1
3	976	300	0.4	2
3	976	300	0.4	3
3	976	300	0.1	4
3	976	300	0.1	5
3	976	300	0.15	6
8	826	300	0.75	1
8	826	300	1	2
8	826	300	0.5	3
8	826	300	0.5	4
8	826	300	0.5	5
8	826	300	0	6
13	939	300	0.3	1
13	939	300	0.25	2
13	939	300	0.3	3
13	939	300	0.1	4
13	939	300	0.05	5
13	939	300	0.1	6
20	945	300	1	1
20	945	300	0.75	2
20	945	300	0.5	3
20	945	300	0.75	4
20	945	300	0.5	5
20	945	300	0	6
34	939	300	0.1	1
34	939	300	0.25	2
34	939	300	0.25	3
34	939	300	0.25	4
34	939	300	0.1	5
34	939	300	0.25	6
36	913	300	0.5	1
36	913	300	0.75	2
36	913	300	0.5	3
36	913	300	0.5	4
36	913	300	1	5
36	913	300	0.25	6
36	813	300	2	1
36	813	300	0.75	2
36	813	300	1.5	3
36	813	300	0.5	4
36	813	300	0.5	5
36	813	300	0.5	6
36	815	300	1	1
36	815	300	1	2
36	815	300	1	3
36	815	300	1	4
36	815	300	1	5
36	815	300	1.5	6
41	813	300	1	1
41	813	300	0.5	2
41	813	300	0.25	3
41	813	300	0.5	4
41	813	300	0.25	5
41	813	300	0.1	6
45	939	300	1	1
45	939	300	0.1	2
45	939	300	0.1	3
45	939	300	0.25	4
45	939	300	0.25	5
45	939	300	0.25	6
