# Supplementary material for: Perception of microstimulation frequency in human somatosensory cortex
Source: eLife. 2021 Jul 27;10:e65128. doi: 10.7554/eLife.65128 (PMC8376245; doi:10.7554/eLife.65128)
Supplement: Figure 2—figure supplement 1—source data 1. — The file contains the electrode number, stimulation amplitude, stimulation frequency, the train that was selected (response), the order in which the reference train was presented, whether the participant correctly identified the interval with stimulation (success), and block for each trial. [file elife-65128-fig2-figsupp1-data1.xlsx]

## Sheet: Sheet1
Electrode #	Amplitude (uA)	Frequency (Hz)	Response	Order of Reference	Success	Block
3	6	100	1	2	TRUE	1
3	6	300	2	1	TRUE	1
3	6	20	1	1	FALSE	1
3	6	100	1	2	TRUE	2
3	6	300	2	1	TRUE	2
3	6	20	1	2	TRUE	2
3	6	100	1	2	TRUE	3
3	6	20	1	1	FALSE	3
3	6	300	2	1	TRUE	3
3	6	100	1	2	TRUE	4
3	6	300	1	2	TRUE	4
3	6	20	2	2	FALSE	4
3	6	300	1	2	TRUE	5
3	6	20	1	2	TRUE	5
3	6	100	1	2	TRUE	5
3	6	100	1	2	TRUE	6
3	6	20	1	2	TRUE	6
3	6	300	2	1	TRUE	6
3	6	100	2	2	FALSE	7
3	6	300	1	2	TRUE	7
3	6	20	2	2	FALSE	7
3	6	20	1	1	FALSE	8
3	6	100	1	2	TRUE	8
3	6	300	1	2	TRUE	8
3	6	100	2	1	TRUE	9
3	6	20	2	2	FALSE	9
3	6	300	2	1	TRUE	9
3	6	100	2	1	TRUE	10
3	6	300	2	1	TRUE	10
3	6	20	1	2	TRUE	10
3	6	100	1	2	TRUE	11
3	6	20	1	2	TRUE	11
3	6	300	1	2	TRUE	11
3	6	20	2	2	FALSE	12
3	6	300	2	1	TRUE	12
3	6	100	1	2	TRUE	12
3	6	20	2	2	FALSE	13
3	6	100	1	2	TRUE	13
3	6	300	1	2	TRUE	13
3	6	20	2	1	TRUE	14
3	6	300	2	1	TRUE	14
3	6	100	2	2	FALSE	14
3	6	300	1	2	TRUE	15
3	6	100	2	1	TRUE	15
3	6	20	2	2	FALSE	15
34	10	20	1	2	TRUE	1
34	10	300	1	2	TRUE	1
34	10	100	2	2	FALSE	1
34	10	20	2	1	TRUE	2
34	10	100	2	2	FALSE	2
34	10	300	1	2	TRUE	2
34	10	100	1	2	TRUE	3
34	10	20	1	1	FALSE	3
34	10	300	1	2	TRUE	3
34	10	100	1	1	FALSE	4
34	10	300	1	2	TRUE	4
34	10	20	2	2	FALSE	4
34	10	20	2	2	FALSE	5
34	10	100	2	2	FALSE	5
34	10	300	2	1	TRUE	5
34	10	300	2	1	TRUE	6
34	10	100	2	1	TRUE	6
34	10	20	1	2	TRUE	6
34	10	300	1	1	FALSE	7
34	10	100	2	1	TRUE	7
34	10	20	1	2	TRUE	7
34	10	300	2	1	TRUE	8
34	10	20	1	2	TRUE	8
34	10	100	2	1	TRUE	8
34	10	300	1	1	FALSE	9
34	10	100	1	2	TRUE	9
34	10	20	2	2	FALSE	9
34	10	300	2	1	TRUE	10
34	10	100	1	2	TRUE	10
34	10	20	1	1	FALSE	10
34	10	20	2	2	FALSE	11
34	10	300	1	2	TRUE	11
34	10	100	2	2	FALSE	11
34	10	300	2	2	FALSE	12
34	10	20	2	1	TRUE	12
34	10	100	2	2	FALSE	12
34	10	20	1	1	FALSE	13
34	10	300	2	2	FALSE	13
34	10	100	2	1	TRUE	13
34	10	20	1	1	FALSE	14
34	10	300	2	1	TRUE	14
34	10	100	2	1	TRUE	14
34	10	300	1	1	FALSE	15
34	10	100	2	2	FALSE	15
34	10	20	2	2	FALSE	15
2	8	100	1	2	TRUE	1
2	8	20	2	1	TRUE	1
2	8	300	2	1	TRUE	1
2	8	300	2	1	TRUE	2
2	8	20	2	1	TRUE	2
2	8	100	2	1	TRUE	2
2	8	300	1	2	TRUE	3
2	8	20	1	2	TRUE	3
2	8	100	2	1	TRUE	3
2	8	100	2	1	TRUE	4
2	8	20	1	1	FALSE	4
2	8	300	2	1	TRUE	4
2	8	300	1	2	TRUE	5
2	8	20	2	1	TRUE	5
2	8	100	2	1	TRUE	5
2	8	20	2	2	FALSE	6
2	8	300	2	1	TRUE	6
2	8	100	2	1	TRUE	6
2	8	300	1	2	TRUE	7
2	8	20	2	2	FALSE	7
2	8	100	2	1	TRUE	7
2	8	300	1	2	TRUE	8
2	8	20	2	1	TRUE	8
2	8	100	2	2	FALSE	8
2	8	100	2	1	TRUE	9
2	8	300	1	2	TRUE	9
2	8	20	1	2	TRUE	9
2	8	100	2	2	FALSE	10
2	8	20	2	1	TRUE	10
2	8	300	2	1	TRUE	10
2	8	20	2	1	TRUE	11
2	8	300	2	2	FALSE	11
2	8	100	1	1	FALSE	11
2	8	300	2	1	TRUE	12
2	8	20	1	1	FALSE	12
2	8	100	1	2	TRUE	12
2	8	20	2	2	FALSE	13
2	8	100	1	2	TRUE	13
2	8	300	1	2	TRUE	13
2	8	20	1	1	FALSE	14
2	8	100	2	1	TRUE	14
2	8	300	2	1	TRUE	14
2	8	300	1	1	FALSE	15
2	8	20	2	2	FALSE	15
2	8	100	2	2	FALSE	15
22	10	300	2	1	TRUE	1
22	10	20	1	1	FALSE	1
22	10	100	1	1	FALSE	1
22	10	20	1	1	FALSE	2
22	10	100	2	1	TRUE	2
22	10	300	1	2	TRUE	2
22	10	20	2	2	FALSE	3
22	10	300	2	1	TRUE	3
22	10	100	1	1	FALSE	3
22	10	100	1	2	TRUE	4
22	10	300	2	2	FALSE	4
22	10	20	1	2	TRUE	4
22	10	300	2	2	FALSE	5
22	10	100	1	2	TRUE	5
22	10	20	1	2	TRUE	5
22	10	20	2	2	FALSE	6
22	10	100	1	2	TRUE	6
22	10	300	2	1	TRUE	6
22	10	20	2	1	TRUE	7
22	10	100	1	2	TRUE	7
22	10	300	2	1	TRUE	7
22	10	100	2	1	TRUE	8
22	10	300	1	1	FALSE	8
22	10	20	2	1	TRUE	8
22	10	300	1	2	TRUE	9
22	10	20	2	2	FALSE	9
22	10	100	1	2	TRUE	9
22	10	300	2	1	TRUE	10
22	10	100	1	2	TRUE	10
22	10	20	2	2	FALSE	10
22	10	100	1	2	TRUE	11
22	10	20	2	1	TRUE	11
22	10	300	1	2	TRUE	11
22	10	20	2	2	FALSE	12
22	10	300	2	2	FALSE	12
22	10	100	1	1	FALSE	12
22	10	20	1	1	FALSE	13
22	10	100	1	1	FALSE	13
22	10	300	1	2	TRUE	13
22	10	100	2	1	TRUE	14
22	10	300	2	2	FALSE	14
22	10	20	2	2	FALSE	14
22	10	20	1	1	FALSE	15
22	10	100	2	1	TRUE	15
22	10	300	2	1	TRUE	15
