# Supplementary material for: Perception of microstimulation frequency in human somatosensory cortex
Source: eLife. 2021 Jul 27;10:e65128. doi: 10.7554/eLife.65128 (PMC8376245; doi:10.7554/eLife.65128)
Supplement: Figure 2—source data 1. — Each sheet contains data for a for one of the three frequency preference groups (LFP, IFP, or HFP). Each sheet contains information about the electrode number, post-implant day, stimulation amplitude, stimulation frequency, the participant’s response, and the block for each data point. [file elife-65128-fig2-data1.xlsx]

## Sheet: LFP
Electrode #	Post-implant day	Amplitude (uA)	Frequency (Hz)	Block	Response
12	708	20	20	1	0.5
12	708	80	20	1	3
12	708	50	100	1	1
12	708	50	300	1	1.5
12	708	50	20	1	2
12	708	20	100	1	1
12	708	20	300	1	1
12	708	80	100	1	1
12	708	80	300	1	2
12	708	20	300	2	0
12	708	80	100	2	2
12	708	20	20	2	0
12	708	20	100	2	0.5
12	708	50	20	2	2.5
12	708	50	100	2	2.5
12	708	80	300	2	2
12	708	80	20	2	3.5
12	708	50	300	2	2.5
12	708	20	100	3	0.5
12	708	80	100	3	2
12	708	50	100	3	2
12	708	80	20	3	3.5
12	708	80	300	3	2
12	708	50	300	3	2
12	708	20	20	3	0
12	708	20	300	3	0.5
12	708	50	20	3	2.5
12	708	80	100	4	2.5
12	708	20	300	4	0.5
12	708	50	100	4	2
12	708	80	300	4	2.5
12	708	50	300	4	2
12	708	50	20	4	2.5
12	708	20	100	4	1
12	708	20	20	4	0.5
12	708	80	20	4	3.5
12	708	50	100	5	2
12	708	80	300	5	2.5
12	708	80	20	5	3.5
12	708	20	300	5	0
12	708	50	20	5	3
12	708	20	20	5	0.5
12	708	20	100	5	0.5
12	708	50	300	5	1.5
12	708	80	100	5	2.5
12	708	50	20	6	3
12	708	80	20	6	3.5
12	708	20	20	6	0
12	708	50	300	6	1.5
12	708	20	300	6	0.5
12	708	50	100	6	1.5
12	708	80	300	6	2
12	708	20	100	6	0
12	708	80	100	6	2
12	721	50	100	1	1
12	721	20	100	1	0.5
12	721	20	20	1	0
12	721	20	300	1	1
12	721	50	20	1	2
12	721	80	300	1	2
12	721	50	300	1	1.5
12	721	80	100	1	1.5
12	721	80	20	1	2.5
12	721	80	100	2	2
12	721	80	20	2	2.5
12	721	20	300	2	0.5
12	721	20	100	2	0
12	721	80	300	2	1.5
12	721	50	100	2	1.5
12	721	50	300	2	1
12	721	20	20	2	0
12	721	50	20	2	2
12	721	80	300	3	2
12	721	20	20	3	0
12	721	20	300	3	0.25
12	721	50	100	3	0.5
12	721	50	300	3	1
12	721	50	20	3	2
12	721	80	20	3	3
12	721	20	100	3	0.5
12	721	80	100	3	1.5
12	721	50	20	4	1.5
12	721	80	100	4	1.5
12	721	80	300	4	2
12	721	20	20	4	0
12	721	20	300	4	0.5
12	721	80	20	4	3
12	721	20	100	4	1
12	721	50	100	4	1
12	721	50	300	4	1.5
12	721	80	300	5	2
12	721	20	20	5	0
12	721	50	100	5	2
12	721	20	100	5	0
12	721	50	300	5	2
12	721	20	300	5	0
12	721	80	100	5	1
12	721	50	20	5	2
12	721	80	20	5	3
12	721	80	20	6	3.5
12	721	50	300	6	1
12	721	20	20	6	0
12	721	20	100	6	0.25
12	721	80	300	6	1.5
12	721	80	100	6	2
12	721	50	100	6	2
12	721	20	300	6	0
12	721	50	20	6	2.5
49	700	80	20	1	4
49	700	50	300	1	2
49	700	20	20	1	0
49	700	80	300	1	1
49	700	20	100	1	0
49	700	80	100	1	3
49	700	20	300	1	0
49	700	50	20	1	1.5
49	700	50	100	1	1.5
49	700	50	20	2	1.5
49	700	20	300	2	0
49	700	80	100	2	2
49	700	50	100	2	1.75
49	700	80	20	2	4.5
49	700	80	300	2	1.75
49	700	20	20	2	0
49	700	20	100	2	0
49	700	50	300	2	1
49	700	80	20	3	4
49	700	50	100	3	1.5
49	700	50	20	3	3
49	700	20	100	3	0
49	700	50	300	3	1
49	700	80	300	3	1.5
49	700	20	20	3	0.5
49	700	20	300	3	0
49	700	80	100	3	3
49	700	50	20	4	3.5
49	700	20	20	4	0
49	700	80	300	4	1.5
49	700	50	300	4	0.5
49	700	20	300	4	0
49	700	20	100	4	0
49	700	80	20	4	4.5
49	700	50	100	4	2
49	700	80	100	4	2.5
49	700	20	300	5	1
49	700	80	100	5	1.5
49	700	50	300	5	1
49	700	20	20	5	0
49	700	20	100	5	0.5
49	700	80	20	5	4
49	700	50	100	5	1.75
49	700	50	20	5	2.5
49	700	80	300	5	1.5
49	700	50	300	6	0.5
49	700	20	20	6	0
49	700	80	20	6	3.5
49	700	50	100	6	1.5
49	700	80	300	6	1.5
49	700	50	20	6	2.5
49	700	20	300	6	0
49	700	80	100	6	2
49	700	20	100	6	0.5
49	721	50	100	1	1
49	721	80	20	1	3
49	721	20	100	1	0
49	721	80	300	1	1
49	721	50	20	1	1.5
49	721	20	20	1	0
49	721	80	100	1	1.5
49	721	50	300	1	0.5
49	721	20	300	1	0
49	721	20	20	2	0
49	721	80	20	2	4
49	721	80	300	2	1
49	721	50	20	2	1.5
49	721	20	100	2	0
49	721	50	300	2	0.5
49	721	50	100	2	1
49	721	80	100	2	1.5
49	721	20	300	2	0
49	721	80	20	3	3
49	721	20	100	3	0
49	721	50	100	3	1
49	721	50	300	3	1
49	721	80	100	3	1
49	721	80	300	3	1
49	721	20	20	3	0
49	721	20	300	3	0
49	721	50	20	3	1.5
49	721	50	300	4	1
49	721	20	20	4	0
49	721	50	20	4	2
49	721	50	100	4	1.5
49	721	80	20	4	4
49	721	20	300	4	0
49	721	80	100	4	1.5
49	721	20	100	4	0
49	721	80	300	4	1.5
49	721	50	20	5	1.5
49	721	20	300	5	0
49	721	80	20	5	4
49	721	20	20	5	0
49	721	80	100	5	1.5
49	721	80	300	5	1
49	721	50	100	5	1
49	721	50	300	5	0.5
49	721	20	100	5	0
49	721	80	300	6	1
49	721	50	300	6	0.5
49	721	20	300	6	0
49	721	80	20	6	4
49	721	20	100	6	0
49	721	80	100	6	1.5
49	721	50	100	6	1
49	721	20	20	6	0
49	721	50	20	6	2

## Sheet: IFP
Electrode #	Post-implant day	Amplitude (uA)	Frequency (Hz)	Block	Response
19	700	50	300	1	3
19	700	20	20	1	0
19	700	80	300	1	5
19	700	50	100	1	5
19	700	80	100	1	6
19	700	20	100	1	1
19	700	20	300	1	1
19	700	50	20	1	1
19	700	80	20	1	2
19	700	20	100	2	1.5
19	700	80	20	2	2.5
19	700	80	100	2	7
19	700	80	300	2	7
19	700	20	300	2	1
19	700	50	100	2	4
19	700	50	300	2	4.5
19	700	50	20	2	1.5
19	700	20	20	2	0
19	700	20	300	3	1
19	700	80	20	3	2
19	700	50	300	3	3
19	700	80	100	3	5
19	700	80	300	3	5
19	700	50	100	3	6
19	700	20	100	3	3
19	700	50	20	3	1.5
19	700	20	20	3	0.5
19	700	20	20	4	0
19	700	50	300	4	5.5
19	700	20	300	4	4.5
19	700	80	100	4	7.5
19	700	50	100	4	6.5
19	700	80	300	4	5.5
19	700	20	100	4	2
19	700	80	20	4	3
19	700	50	20	4	2
19	700	20	300	5	2
19	700	20	20	5	0
19	700	50	20	5	2
19	700	80	20	5	2.5
19	700	80	100	5	7
19	700	80	300	5	6
19	700	20	100	5	3
19	700	50	100	5	3.5
19	700	50	300	5	3.5
19	700	20	100	6	2.5
19	700	50	100	6	5.5
19	700	50	20	6	1.5
19	700	80	300	6	4
19	700	50	300	6	4
19	700	80	100	6	5.5
19	700	20	20	6	0
19	700	20	300	6	1
19	700	80	20	6	1.5
19	701	80	300	1	3
19	701	80	100	1	3
19	701	50	100	1	2.5
19	701	20	100	1	1
19	701	20	300	1	0.5
19	701	80	20	1	1
19	701	50	20	1	0.75
19	701	50	300	1	2
19	701	20	20	1	0
19	701	80	100	2	4
19	701	20	300	2	1.5
19	701	20	20	2	0
19	701	20	100	2	0
19	701	50	100	2	1.5
19	701	80	300	2	3
19	701	50	300	2	3.5
19	701	50	20	2	1
19	701	80	20	2	1
19	701	80	20	3	1
19	701	50	100	3	2.5
19	701	80	100	3	3.5
19	701	80	300	3	3.5
19	701	20	300	3	1
19	701	50	300	3	2
19	701	50	20	3	1
19	701	20	100	3	0.5
19	701	20	20	3	0
19	701	50	100	4	3
19	701	80	20	4	3.5
19	701	20	20	4	1
19	701	50	20	4	0.75
19	701	50	300	4	2
19	701	80	100	4	3.5
19	701	80	300	4	3.75
19	701	20	300	4	1
19	701	20	100	4	1
19	701	80	20	5	2
19	701	80	300	5	4
19	701	20	20	5	0
19	701	20	300	5	0
19	701	20	100	5	1
19	701	80	100	5	4.5
19	701	50	20	5	2
19	701	50	300	5	2
19	701	50	100	5	3
19	701	50	300	6	3
19	701	80	20	6	2.75
19	701	50	20	6	1.5
19	701	50	100	6	3
19	701	80	300	6	4
19	701	20	100	6	1
19	701	20	300	6	0.5
19	701	80	100	6	3.5
19	701	20	20	6	0
22	735	80	300	1	3
22	735	20	20	1	1
22	735	80	20	1	2
22	735	20	100	1	3
22	735	50	100	1	3.5
22	735	80	100	1	4
22	735	20	300	1	1
22	735	50	300	1	2
22	735	50	20	1	1.5
22	735	20	100	2	1
22	735	20	300	2	1
22	735	50	100	2	2
22	735	50	300	2	2.5
22	735	80	100	2	4
22	735	50	20	2	1.5
22	735	80	20	2	2
22	735	80	300	2	3.5
22	735	20	20	2	0
22	735	80	20	3	1.5
22	735	50	20	3	1.5
22	735	80	100	3	3
22	735	20	20	3	0.5
22	735	20	100	3	0.5
22	735	80	300	3	2.5
22	735	50	100	3	2.5
22	735	50	300	3	2
22	735	20	300	3	1
22	735	80	100	4	3
22	735	20	300	4	1
22	735	80	20	4	1.5
22	735	80	300	4	3.5
22	735	20	100	4	0.5
22	735	50	100	4	1.5
22	735	50	300	4	2
22	735	20	20	4	0
22	735	50	20	4	1
22	735	20	100	5	1
22	735	50	20	5	1
22	735	80	100	5	4
22	735	50	300	5	4
22	735	50	100	5	3.5
22	735	80	300	5	4
22	735	80	20	5	4
22	735	20	20	5	0
22	735	20	300	5	0.5
22	735	80	100	6	3.5
22	735	20	100	6	0.5
22	735	20	300	6	0
22	735	80	20	6	2
22	735	50	20	6	1
22	735	20	20	6	0
22	735	50	100	6	3
22	735	50	300	6	3
22	735	80	300	6	4
22	752	80	20	1	1
22	752	20	100	1	1
22	752	20	20	1	0.5
22	752	50	100	1	2
22	752	50	20	1	1
22	752	20	300	1	0.5
22	752	50	300	1	1.5
22	752	80	100	1	2
22	752	80	300	1	2
22	752	80	300	2	2
22	752	20	20	2	0
22	752	80	100	2	2
22	752	20	300	2	0
22	752	50	100	2	1
22	752	50	300	2	1.5
22	752	80	20	2	1
22	752	50	20	2	0.5
22	752	20	100	2	0.5
22	752	50	100	3	2
22	752	80	300	3	2.5
22	752	80	100	3	2.5
22	752	80	20	3	0.5
22	752	20	100	3	0.25
22	752	20	300	3	0.5
22	752	50	20	3	0.5
22	752	20	20	3	0
22	752	50	300	3	2
22	752	50	100	4	2.5
22	752	80	100	4	3
22	752	50	300	4	2.5
22	752	20	100	4	0.5
22	752	50	20	4	0.5
22	752	20	300	4	0.25
22	752	20	20	4	0
22	752	80	300	4	3
22	752	80	20	4	1
22	752	20	100	5	0.5
22	752	20	300	5	0.5
22	752	80	300	5	2.5
22	752	50	300	5	2
22	752	80	20	5	1.5
22	752	80	100	5	2.5
22	752	50	20	5	1
22	752	20	20	5	0
22	752	50	100	5	2.5
22	752	50	300	6	2
22	752	80	20	6	2
22	752	20	100	6	1
22	752	50	20	6	1
22	752	20	20	6	0
22	752	80	100	6	2.5
22	752	80	300	6	2.5
22	752	20	300	6	1
22	752	50	100	6	1.5
58	701	80	20	1	3
58	701	80	300	1	1
58	701	50	20	1	1.5
58	701	20	300	1	0
58	701	20	20	1	0
58	701	50	300	1	0.5
58	701	50	100	1	1
58	701	20	100	1	0
58	701	80	100	1	1.5
58	701	20	300	2	0
58	701	80	300	2	0
58	701	20	20	2	0
58	701	50	100	2	0.5
58	701	50	20	2	1
58	701	20	100	2	0.5
58	701	80	20	2	3.5
58	701	80	100	2	1.5
58	701	50	300	2	0.5
58	701	50	300	3	0.5
58	701	20	300	3	0.25
58	701	50	100	3	1
58	701	20	20	3	0
58	701	50	20	3	1.5
58	701	80	300	3	1
58	701	80	20	3	2
58	701	80	100	3	1.5
58	701	20	100	3	0.25
58	701	80	300	4	0.5
58	701	50	20	4	1
58	701	50	300	4	0
58	701	20	20	4	0
58	701	80	20	4	2
58	701	50	100	4	1.5
58	701	20	300	4	0.25
58	701	80	100	4	2
58	701	20	100	4	1
58	701	50	100	5	0.75
58	701	20	20	5	0
58	701	80	300	5	0.5
58	701	50	300	5	0.5
58	701	80	100	5	1
58	701	20	100	5	0
58	701	80	20	5	2
58	701	50	20	5	1.5
58	701	20	300	5	1
58	701	50	20	6	1
58	701	20	300	6	0.5
58	701	80	100	6	1.5
58	701	50	300	6	0.75
58	701	20	100	6	0
58	701	50	100	6	1
58	701	80	300	6	1.75
58	701	80	20	6	2
58	701	20	20	6	0
58	722	50	100	1	0.25
58	722	80	20	1	1.5
58	722	50	20	1	0
58	722	20	100	1	0
58	722	80	300	1	0.5
58	722	20	20	1	0
58	722	80	100	1	0.5
58	722	20	300	1	0.5
58	722	50	300	1	0.5
58	722	80	100	2	0.5
58	722	80	300	2	1
58	722	20	300	2	0
58	722	50	20	2	0.75
58	722	50	100	2	0.5
58	722	20	100	2	0.25
58	722	20	20	2	0
58	722	80	20	2	1
58	722	50	300	2	1
58	722	50	100	3	1
58	722	20	20	3	0.5
58	722	50	300	3	0.5
58	722	80	100	3	0.75
58	722	50	20	3	0.5
58	722	80	300	3	0.5
58	722	20	100	3	0
58	722	80	20	3	1
58	722	20	300	3	0.5
58	722	50	20	4	0.5
58	722	20	300	4	0.25
58	722	20	20	4	0
58	722	20	100	4	0
58	722	80	100	4	1
58	722	80	20	4	1.5
58	722	50	300	4	1
58	722	50	100	4	1.5
58	722	80	300	4	1
58	722	50	300	5	1
58	722	20	20	5	0.25
58	722	80	300	5	0.5
58	722	80	20	5	0.5
58	722	50	20	5	0.25
58	722	50	100	5	1
58	722	80	100	5	1.5
58	722	20	100	5	0.25
58	722	20	300	5	0
58	722	20	20	6	0
58	722	50	300	6	0.25
58	722	50	100	6	0.25
58	722	20	300	6	0.5
58	722	80	100	6	0.75
58	722	80	300	6	0.5
58	722	80	20	6	1.5
58	722	50	20	6	1
58	722	20	100	6	0.75

## Sheet: HFP
Electrode #	Post-implant day	Amplitude (uA)	Frequency (Hz)	Block	Response
8	701	80	300	1	3
8	701	50	300	1	1
8	701	50	20	1	0
8	701	80	20	1	0
8	701	20	100	1	0
8	701	80	100	1	1
8	701	20	300	1	0.5
8	701	50	100	1	0.5
8	701	20	20	1	0
8	701	80	20	2	0.5
8	701	50	300	2	2
8	701	20	300	2	0
8	701	80	100	2	2
8	701	50	20	2	0
8	701	20	100	2	0
8	701	50	100	2	1
8	701	20	20	2	0
8	701	80	300	2	2.5
8	701	20	300	3	0
8	701	50	300	3	1
8	701	20	20	3	0
8	701	20	100	3	0
8	701	80	100	3	1.5
8	701	50	20	3	0
8	701	80	300	3	2
8	701	50	100	3	0.5
8	701	80	20	3	0
8	701	20	300	4	0
8	701	20	20	4	0
8	701	50	100	4	1.5
8	701	80	300	4	3
8	701	80	20	4	0
8	701	20	100	4	0
8	701	50	300	4	1
8	701	80	100	4	1
8	701	50	20	4	0
8	701	80	300	5	1
8	701	20	300	5	0.5
8	701	50	100	5	0.25
8	701	80	20	5	0
8	701	80	100	5	2
8	701	20	100	5	0
8	701	20	20	5	0
8	701	50	20	5	0
8	701	50	300	5	1
8	701	20	20	6	0
8	701	80	300	6	1.5
8	701	50	20	6	0.5
8	701	50	300	6	0.25
8	701	80	20	6	0
8	701	20	300	6	0
8	701	50	100	6	0
8	701	80	100	6	1
8	701	20	100	6	0
8	722	80	300	1	1
8	722	80	20	1	0
8	722	80	100	1	0.5
8	722	20	20	1	0
8	722	50	100	1	0.5
8	722	20	100	1	0.5
8	722	50	20	1	0.5
8	722	20	300	1	0.25
8	722	50	300	1	0.5
8	722	80	20	2	0
8	722	50	20	2	0
8	722	80	100	2	1
8	722	20	20	2	0
8	722	80	300	2	1
8	722	20	100	2	0.25
8	722	20	300	2	0.5
8	722	50	100	2	0.25
8	722	50	300	2	0.25
8	722	50	100	3	0.5
8	722	50	20	3	0.25
8	722	80	100	3	0.25
8	722	80	300	3	0.5
8	722	80	20	3	0
8	722	20	300	3	0
8	722	20	100	3	0.25
8	722	20	20	3	0
8	722	50	300	3	0.5
8	722	50	20	4	0.25
8	722	50	300	4	0.25
8	722	80	20	4	0
8	722	50	100	4	0
8	722	20	300	4	0
8	722	20	100	4	0
8	722	80	100	4	0.25
8	722	80	300	4	0.25
8	722	20	20	4	0
8	722	20	300	5	0
8	722	20	20	5	0
8	722	20	100	5	0
8	722	50	100	5	0.25
8	722	50	20	5	0
8	722	80	100	5	0.25
8	722	50	300	5	0.25
8	722	80	20	5	0
8	722	80	300	5	0.25
8	722	50	100	6	0.25
8	722	50	20	6	0
8	722	20	300	6	0
8	722	80	20	6	0
8	722	20	100	6	0
8	722	80	300	6	0.25
8	722	20	20	6	0
8	722	50	300	6	0.25
8	722	80	100	6	0.25
36	700	80	100	1	3
36	700	20	20	1	0
36	700	80	20	1	0.5
36	700	50	20	1	0
36	700	50	100	1	0.5
36	700	80	300	1	2.5
36	700	50	300	1	2.5
36	700	20	300	1	0.5
36	700	20	100	1	0.5
36	700	50	20	2	0
36	700	80	20	2	0.5
36	700	20	300	2	1
36	700	20	100	2	1
36	700	50	300	2	2
36	700	80	300	2	3
36	700	20	20	2	0
36	700	80	100	2	2
36	700	50	100	2	2
36	700	50	20	3	0
36	700	20	20	3	0
36	700	20	300	3	0.5
36	700	80	20	3	0.5
36	700	50	300	3	1.5
36	700	20	100	3	0
36	700	50	100	3	0.5
36	700	80	300	3	2
36	700	80	100	3	1.5
36	700	80	100	4	1.5
36	700	50	300	4	1.5
36	700	50	100	4	1
36	700	80	20	4	0.5
36	700	20	100	4	0.5
36	700	50	20	4	0.5
36	700	20	20	4	0
36	700	80	300	4	2
36	700	20	300	4	0
36	700	50	300	5	1.5
36	700	50	20	5	0
36	700	80	300	5	1
36	700	20	100	5	0
36	700	20	300	5	0.5
36	700	80	20	5	0.5
36	700	80	100	5	2
36	700	50	100	5	1
36	700	20	20	5	0
36	700	80	20	6	1
36	700	80	300	6	2
36	700	50	300	6	2
36	700	50	100	6	1
36	700	20	100	6	0
36	700	20	20	6	0
36	700	50	20	6	0.5
36	700	20	300	6	0
36	700	80	100	6	1
36	717	50	300	1	0.5
36	717	20	20	1	0
36	717	20	100	1	0
36	717	80	300	1	1
36	717	50	100	1	1
36	717	80	20	1	0.5
36	717	20	300	1	0
36	717	80	100	1	1
36	717	50	20	1	0
36	717	20	20	2	0
36	717	50	300	2	1
36	717	20	100	2	0
36	717	80	300	2	2
36	717	50	100	2	0.5
36	717	80	20	2	0
36	717	50	20	2	0.25
36	717	80	100	2	0.5
36	717	20	300	2	0.5
36	717	50	300	3	1
36	717	50	100	3	1
36	717	50	20	3	0
36	717	20	100	3	0.25
36	717	20	300	3	0
36	717	20	20	3	0
36	717	80	20	3	0
36	717	80	300	3	1.5
36	717	80	100	3	1.5
36	717	20	100	4	0.5
36	717	50	20	4	0.5
36	717	50	300	4	0.75
36	717	80	300	4	1.5
36	717	80	100	4	1.5
36	717	50	100	4	1
36	717	80	20	4	0.75
36	717	20	300	4	0
36	717	20	20	4	0
36	717	80	20	5	0.5
36	717	50	300	5	1
36	717	80	100	5	1
36	717	20	300	5	0.75
36	717	80	300	5	1.5
36	717	20	100	5	0
36	717	20	20	5	0
36	717	50	100	5	0.5
36	717	50	20	5	0.25
36	717	20	300	6	0
36	717	50	300	6	0.75
36	717	50	100	6	0.75
36	717	20	20	6	0
36	717	80	20	6	0.25
36	717	20	100	6	0
36	717	50	20	6	0
36	717	80	300	6	1.5
36	722	20	100	1	0
36	722	20	300	1	0.5
36	722	80	300	1	1
36	722	50	300	1	1.5
36	722	20	20	1	0
36	722	50	20	1	0
36	722	50	100	1	0.5
36	722	80	20	1	0.5
36	722	80	100	1	0.5
36	722	80	20	2	0.5
36	722	50	100	2	0.5
36	722	20	300	2	0.25
36	722	80	100	2	1
36	722	20	20	2	0
36	722	20	100	2	0
36	722	50	20	2	0.25
36	722	80	300	2	1.5
36	722	50	300	2	1
36	722	50	300	3	1.5
36	722	20	300	3	1
36	722	20	100	3	0
36	722	50	100	3	0.5
36	722	80	100	3	1
36	722	80	300	3	2
36	722	80	20	3	0
36	722	50	20	3	0.25
36	722	20	20	3	0
36	722	20	20	4	0
36	722	20	100	4	0
36	722	80	300	4	1.5
36	722	20	300	4	0.25
36	722	80	100	4	1.5
36	722	50	20	4	1
36	722	50	300	4	1
36	722	80	20	4	0.25
36	722	50	100	4	0.5
36	722	20	100	5	0.25
36	722	20	20	5	0
36	722	80	20	5	0.25
36	722	50	100	5	0.75
36	722	50	300	5	1
36	722	80	100	5	1.5
36	722	50	20	5	0.25
36	722	20	300	5	0
36	722	80	300	5	1.5
36	722	20	100	6	0.25
36	722	50	20	6	0
36	722	50	100	6	0.5
36	722	80	20	6	0.25
36	722	80	300	6	1.5
36	722	80	100	6	1.5
36	722	20	300	6	0
36	722	20	20	6	0
36	722	50	300	6	1
