# Supplementary material for: Perception of microstimulation frequency in human somatosensory cortex
Source: eLife. 2021 Jul 27;10:e65128. doi: 10.7554/eLife.65128 (PMC8376245; doi:10.7554/eLife.65128)
Supplement: Figure 3—figure supplement 1—source data 1. — It also includes a logical array with information about which electrodes were stimulated during each survey. Sheets are divided by the stimulus frequency provided in the survey. [file elife-65128-fig3-figsupp1-data1.xlsx]

## Sheet: 20 Hz
Qualitative reports
	Electrode #	1	2	3	4	5	6	7	8	9	10	11	12	13	14	15	16	17	18	19	20	21	22	23	24	25	26	27	28	29	30	31	32	33	34	35	36	37	38	39	40	41	42	43	44	45	46	47	48
Survey #
1		[]	' pressure spark touch poke'	[]	' tingle pressure'	[]	[]	[]	[]	[]	' pressure spark touch tapping'	[]	' pressure spark touch tapping'	[]	' pressure spark touch buzz'	' pressure spark touch'	' tingle pressure touch tapping'	' pressure spark touch'	' pressure spark touch tapping'	' tingle pressure'	' pressure'	[]	' tingle touch tapping'	' pressure touch'	[]	[]	' tingle sharp buzz tapping'	[]	' pressure touch'	[]	[]	[]	[]	[]	[]	[]	' tingle'	[]	[]	[]	[]	[]	' tingle pressure spark touch'	[]	' tingle pressure warm touch tapping'	[]	' pressure touch tapping'	[]	' pressure warm sharp'
2		[]	' pressure spark poke tapping'	[]	[]	[]	[]	[]	[]	[]	' tingle pressure tapping'	[]	' tingle pressure spark tapping'	[]	[]	' pressure tapping'	[]	' tingle pressure tapping'	[]	' tingle pressure tapping'	[]	[]	' tingle pressure'	[]	[]	[]	[]	[]	' pressure tapping'	[]	[]	[]	[]	[]	[]	[]	[]	[]	[]	[]	[]	[]	[]	[]	' tingle pressure spark poke tapping'	[]	[]	[]	' tingle pressure warm tapping'
3		[]	[]	[]	[]	[]	[]	[]	[]	[]	[]	[]	[]	[]	[]	[]	[]	[]	[]	' pressure tapping'	[]	[]	[]	[]	[]	[]	[]	[]	[]	[]	[]	[]	[]	[]	[]	[]	[]	[]	[]	[]	[]	[]	[]	[]	[]	[]	[]	[]	[]
4		[]	[]	[]	[]	[]	[]	[]	[]	[]	[]	[]	' pressure spark tapping'	[]	[]	[]	[]	[]	[]	[]	[]	[]	[]	[]	[]	' tingle pressure'	[]	[]	[]	[]	[]	[]	[]	[]	[]	[]	[]	[]	[]	[]	[]	[]	[]	[]	[]	[]	[]	[]	[]
5		[]	' tingle pressure warm spark touch'	[]	' tingle pressure tapping'	[]	[]	[]	[]	[]	' pressure spark touch'	[]	' pressure spark touch'	[]	' spark'	' tingle tapping'	' pressure touch tapping'	' tingle pressure touch tapping'	' tingle pressure touch'	' pressure sharp touch tapping'	' pressure tapping'	[]	' pressure sharp tapping'	' pressure touch tapping'	[]	[]	' pressure touch poke tapping'	[]	' pressure spark'	[]	[]	[]	[]	[]	' tingle warm'	[]	[]	[]	[]	[]	' tingle pressure'	[]	' pressure touch tapping'	[]	' tingle pressure tapping'	[]	' pressure spark touch tapping'	[]	' tingle pressure touch tapping'
6		[]	[]	[]	[]	[]	[]	[]	[]	[]	' tingle pressure tapping'	[]	' pressure tapping'	[]	[]	[]	' pressure warm sharp vibration buzz'	[]	[]	' tingle warm sharp'	[]	[]	[]	[]	[]	' pressure sharp vibration'	[]	[]	[]	[]	[]	[]	[]	[]	[]	[]	[]	[]	[]	[]	[]	[]	[]	[]	[]	[]	[]	[]	[]
Stimulated or not (1 or 0)
	Electrode #	1	2	3	4	5	6	7	8	9	10	11	12	13	14	15	16	17	18	19	20	21	22	23	24	25	26	27	28	29	30	31	32	33	34	35	36	37	38	39	40	41	42	43	44	45	46	47	48
Survey #
1		1	1	1	1	1	1	1	1	0	1	1	1	1	1	1	1	1	1	1	1	1	1	1	1	1	1	1	1	1	0	0	0	1	0	1	1	1	1	1	1	1	1	1	1	1	1	1	1
2		0	1	0	0	0	0	0	0	0	1	0	1	0	0	1	0	1	0	1	0	0	1	0	0	0	0	0	1	0	0	0	0	0	0	0	1	0	0	0	0	1	0	0	1	0	0	0	1
3		0	0	0	0	0	0	0	0	0	0	0	0	0	0	0	0	0	0	1	0	0	0	0	0	0	0	0	0	0	0	0	0	0	0	0	1	0	0	0	0	0	0	0	0	0	0	0	0
4		0	0	0	0	0	0	0	1	0	0	0	1	0	0	0	0	0	0	0	0	0	0	0	0	1	0	0	0	0	0	0	0	0	0	0	1	0	0	0	0	0	0	0	0	0	0	0	0
5		1	1	1	1	1	1	1	1	0	1	1	1	1	1	1	1	1	1	1	1	1	1	1	1	1	1	1	1	1	0	0	0	1	1	1	1	1	1	1	1	1	1	1	1	1	1	1	1
6		0	0	0	0	0	0	0	1	0	1	0	1	0	0	0	1	0	0	1	0	0	0	0	0	1	0	0	0	0	0	0	0	0	0	0	1	0	0	0	1	0	0	0	0	0	0	0	0
[truncated: 16 more columns]

## Sheet: 100 Hz
Qualitative reports
	Electrode #	1	2	3	4	5	6	7	8	9	10	11	12	13	14	15	16	17	18	19	20	21	22	23	24	25	26	27	28	29	30	31	32	33	34	35	36	37	38	39	40	41	42	43	44	45	46	47	48
Survey #
1		' tingle poke'	' tingle pressure'	' tingle pressure poke'	' tingle sharp'	[]	' pressure'	' tingle'	[]	[]	' tingle'	[]	' tingle'	' tingle'	' tingle warm buzz'	' tingle'	' buzz'	' tingle'	' tingle warm'	' sharp vibration buzz'	' tingle pressure'	' pressure'	' warm buzz'	' tingle warm'	[]	' warm buzz'	' buzz'	[]	' buzz'	' pressure'	[]	[]	' sharp buzz'	[]	' tingle warm'	' tingle'	[]	' warm'	' tingle'	' tingle'	' tingle'	' tingle'	' tingle'	' tingle'	' tingle warm'	[]	[]	' tingle'	' tingle sharp'
2		[]	' tingle pressure'	' tingle pressure poke'	' tingle pressure sharp buzz'	[]	' pressure'	[]	' tingle pressure poke'	[]	[]	[]	[]	' tingle'	' tingle sharp vibration buzz'	' tingle'	' tingle pressure buzz'	[]	' tingle warm'	' tingle pressure warm sharp vibration buzz'	' pressure'	' tingle'	' buzz'	[]	[]	' tingle pressure vibration buzz'	' buzz'	[]	[]	' tingle pressure'	[]	[]	[]	[]	[]	[]	' tingle pressure poke'	[]	[]	[]	' tingle'	[]	' tingle'	' tingle warm'	' tingle warm'	[]	' tingle'	[]	' tingle warm'
3		[]	' tingle warm'	[]	[]	[]	[]	[]	[]	[]	' tingle'	[]	' tingle warm'	[]	[]	' tingle'	[]	' tingle warm'	[]	' warm buzz'	[]	[]	' buzz'	[]	[]	[]	[]	[]	' tingle warm'	[]	[]	[]	[]	[]	[]	[]	' tingle'	[]	[]	[]	[]	' tingle'	[]	[]	' tingle'	[]	[]	[]	' tingle warm'
4		[]	' tingle pressure'	' pressure touch poke'	' tingle sharp vibration buzz'	[]	' pressure'	' tingle'	' tingle'	[]	' tingle'	[]	' tingle pressure'	' tingle'	' pressure warm sharp vibration buzz'	' tingle'	' warm sharp buzz'	' tingle'	' tingle'	' tingle warm sharp vibration buzz'	' tingle pressure'	' tingle'	' sharp buzz'	' tingle'	[]	' tingle pressure warm'	' buzz'	' tingle'	' tingle warm'	' tingle pressure warm'	[]	[]	[]	[]	' tingle'	' tingle'	' poke'	' tingle pressure'	' tingle'	[]	' tingle warm'	' tingle poke'	' tingle'	[]	' tingle warm'	[]	' tingle warm'	' tingle'	' tingle sharp'
5		[]	[]	[]	[]	[]	[]	[]	[]	[]	[]	[]	[]	[]	[]	[]	[]	[]	[]	' tingle warm buzz'	[]	[]	[]	[]	[]	[]	[]	[]	[]	[]	[]	[]	[]	[]	[]	[]	' tingle'	[]	[]	[]	[]	[]	[]	[]	[]	[]	[]	[]	[]
6		' tingle'	' pressure buzz'	' tingle pressure touch poke'	' pressure buzz'	[]	' tingle pressure'	' tingle pressure'	' tingle'	[]	' tingle warm'	[]	' tingle pressure'	' tingle'	' tingle warm sharp vibration buzz'	' tingle pressure'	' warm sharp buzz'	[]	' tingle warm'	' tingle pressure sharp vibration buzz'	' tingle pressure'	' tingle pressure warm'	' tingle pressure sharp vibration buzz'	[]	[]	' tingle pressure warm vibration buzz'	' tingle pressure sharp vibration buzz'	' tingle pressure'	' tingle pressure warm'	' pressure warm'	[]	[]	[]	[]	' tingle warm'	' tingle pressure'	' tingle pressure poke'	' tingle warm'	' pressure'	' tingle'	' tingle pressure'	' tingle warm'	' tingle'	' tingle warm'	' tingle pressure warm'	[]	' tingle'	' tingle pressure'	' tingle warm'
7		[]	' tingle'	' tingle pressure touch poke'	' tingle pressure sharp'	' tingle'	' tingle pressure warm'	' tingle warm'	' tingle'	[]	' tingle warm'	[]	' tingle'	' tingle'	' pressure warm sharp vibration buzz'	' tingle'	' tingle pressure sharp'	' tingle warm'	' tingle warm'	' tingle pressure sharp buzz'	' tingle pressure warm'	' tingle'	' tingle pressure warm sharp'	' tingle warm'	[]	' tingle warm sharp'	' pressure sharp vibration'	' tingle pressure'	' tingle warm'	' tingle pressure warm sharp'	[]	[]	[]	[]	' tingle'	[]	' tingle pressure touch poke'	' tingle'	' tingle'	' tingle'	' tingle'	' tingle'	' tingle pressure'	[]	' tingle warm'	[]	' tingle sharp'	' tingle'	' tingle warm'
8		[]	' tingle pressure warm'	' tingle pressure poke'	' tingle pressure warm sharp vibration buzz'	' tingle warm'	' tingle pressure warm'	' tingle pressure'	' tingle pressure tapping'	[]	' tingle warm'	[]	' tingle pressure warm'	' tingle pressure'	' tingle pressure warm sharp vibration'	' tingle pressure'	' pressure warm sharp buzz'	' tingle'	' tingle warm'	' pressure warm sharp vibration'	' pressure warm sharp vibration buzz'	[]	' pressure warm sharp buzz'	' tingle warm'	[]	' tingle pressure warm sharp'	' pressure sharp vibration buzz'	' tingle warm'	' tingle pressure warm'	' tingle pressure warm'	[]	[]	[]	[]	' tingle warm'	' tingle tapping'	' tingle pressure'	' tingle'	' tingle pressure'	' tingle'	' tingle pressure'	' tingle'	' tingle'	' tingle'	' tingle sharp'	[]	' tingle warm'	' tingle warm'	' tingle warm'
9		[]	[]	[]	[]	[]	[]	[]	[]	[]	' tingle pressure tapping'	[]	' pressure tapping'	[]	[]	[]	' pressure warm sharp vibration buzz'	[]	[]	' tingle warm sharp'	[]	[]	[]	[]	[]	' pressure sharp vibration'	[]	[]	[]	[]	[]	[]	[]	[]	[]	[]	[]	[]	[]	[]	[]	[]	[]	[]	[]	[]	[]	[]	[]
10		[]	[]	' tingle pressure poke'	[]	[]	[]	[]	[]	[]	' tingle pressure'	[]	' tingle pressure warm'	[]	[]	[]	' tingle pressure warm'	' tingle pressure'	[]	[]	[]	[]	[]	[]	[]	[]	[]	[]	[]	[]	[]	[]	[]	[]	[]	[]	[]	[]	[]	[]	[]	[]	[]	[]	[]	[]	[]	[]	[]
11		[]	' tingle pressure'	' tingle pressure poke'	' tingle pressure'	[]	' tingle pressure warm'	' tingle'	' tingle'	[]	' tingle pressure'	[]	' tingle pressure'	' tingle pressure poke'	' tingle pressure sharp'	' tingle'	' pressure warm sharp vibration buzz'	' tingle'	' tingle pressure'	' tingle pressure warm sharp'	' tingle pressure'	' pressure'	' pressure sharp vibration buzz'	' tingle pressure'	[]	' pressure warm sharp'	' tingle pressure sharp vibration buzz'	[]	' pressure warm'	' tingle pressure warm'	[]	[]	[]	[]	' tingle'	[]	' tingle pressure poke'	[]	' pressure'	[]	' tingle pressure'	' tingle'	' tingle pressure'	' tingle'	' tingle pressure warm'	[]	' tingle pressure warm'	' pressure'	' tingle'
12		[]	[]	' tingle pressure poke'	' tingle pressure'	[]	' pressure'	' tingle'	' tingle'	[]	' pressure'	[]	' tingle pressure'	' tingle'	' tingle pressure sharp'	' pressure'	' tingle pressure sharp vibration buzz'	' tingle pressure'	' tingle pressure'	' pressure warm sharp vibration'	' tingle pressure'	[]	' tingle pressure sharp buzz'	' tingle pressure'	[]	' tingle pressure warm sharp'	' tingle sharp vibration buzz'	' tingle'	' tingle'	' tingle pressure warm'	[]	[]	[]	[]	' tingle pressure'	[]	' tingle pressure touch poke'	' tingle'	' tingle pressure'	[]	' tingle pressure'	' tingle'	' tingle pressure sharp vibration buzz'	[]	' tingle pressure'	[]	' tingle pressure'	' tingle'	' tingle pressure'
13		[]	' tingle pressure warm'	' tingle pressure poke'	' tingle pressure sharp'	[]	' pressure'	[]	' poke'	[]	' tingle pressure warm'	' tingle warm'	' tingle pressure warm'	[]	' tingle pressure warm buzz'	[]	' pressure warm sharp buzz'	' pressure touch poke'	' pressure'	' tingle warm sharp'	' tingle sharp'	' tingle pressure'	' tingle pressure warm sharp buzz'	' tingle warm'	[]	' tingle pressure warm sharp'	' tingle sharp vibration buzz'	' tingle pressure warm'	' tingle pressure warm'	' tingle pressure warm sharp buzz'	[]	[]	[]	[]	' tingle'	[]	' tingle pressure touch poke'	' pressure'	' pressure'	[]	' tingle pressure'	' tingle'	' tingle warm'	[]	' tingle pressure warm'	[]	' tingle warm'	' tingle pressure warm'	' tingle warm'
14		' tingle'	' tingle warm'	' tingle pressure poke'	' tingle pressure warm sharp'	' tingle'	' pressure'	' tingle'	' tingle'	[]	' tingle pressure'	[]	' tingle pressure'	' tingle'	' tingle pressure sharp'	' tingle'	' tingle pressure warm sharp buzz'	' tingle pressure warm'	' tingle warm'	' tingle pressure warm sharp'	' tingle pressure warm'	' tingle pressure'	' tingle pressure sharp'	' tingle pressure warm'	[]	' tingle pressure warm buzz'	' tingle pressure sharp vibration buzz'	' tingle'	' tingle pressure warm'	' tingle pressure warm sharp'	[]	[]	[]	[]	' tingle pressure'	' tingle'	' tingle pressure poke'	' tingle'	' pressure'	' tingle'	' tingle'	' tingle pressure'	' tingle'	[]	' tingle warm'	' tingle'	' tingle warm'	' tingle'	' tingle pressure'
Stimulated or not (1 or 0)
	Electrode #	1	2	3	4	5	6	7	8	9	10	11	12	13	14	15	16	17	18	19	20	21	22	23	24	25	26	27	28	29	30	31	32	33	34	35	36	37	38	39	40	41	42	43	44	45	46	47	48
Survey #
1		1	1	1	1	1	1	1	1	0	1	1	1	1	1	1	1	1	1	1	1	1	1	1	1	1	1	1	1	1	0	0	1	1	1	1	1	1	1	1	1	1	1	1	1	1	1	1	1
2		0	1	1	1	1	1	1	1	0	1	1	1	1	1	1	1	1	1	1	1	1	1	1	1	1	1	1	1	1	0	0	0	1	1	1	1	1	1	1	1	1	1	1	1	1	1	1	1
3		0	1	0	0	0	0	0	0	0	1	0	1	0	0	1	0	1	0	1	0	0	1	0	0	0	0	0	1	0	0	0	0	0	0	0	1	0	0	0	0	1	0	0	1	0	0	0	1
4		1	1	1	1	1	1	1	1	0	1	1	1	1	1	1	1	1	1	1	1	1	1	1	1	1	1	1	1	1	0	0	0	1	1	1	1	1	1	1	1	1	1	1	1	1	1	1	1
5		0	0	0	0	0	0	0	0	0	0	0	0	0	0	0	0	0	0	1	0	0	0	0	0	0	0	0	0	0	0	0	0	0	0	0	1	0	0	0	0	0	0	0	0	0	0	0	0
6		1	1	1	1	1	1	1	1	0	1	1	1	1	1	1	1	1	1	1	1	1	1	1	1	1	1	1	1	1	0	0	0	1	1	1	1	1	1	1	1	1	1	1	1	1	1	1	1
7		1	1	1	1	1	1	1	1	0	1	1	1	1	1	1	1	1	1	1	1	1	1	1	1	1	1	1	1	1	0	0	0	1	1	1	1	1	1	1	1	1	1	1	1	1	1	1	1
8		1	1	1	1	1	1	1	1	0	1	1	1	1	1	1	1	1	1	1	1	1	1	1	1	1	1	1	1	1	0	0	0	1	1	1	1	1	1	1	1	1	1	1	1	1	1	1	1
9		0	0	0	0	0	0	0	1	0	1	0	1	0	0	0	1	0	0	1	0	0	0	0	0	1	0	0	0	0	0	0	0	0	0	0	1	0	0	0	1	0	0	0	0	0	0	0	0
10		0	0	1	0	0	0	0	0	0	1	0	1	0	0	0	1	1	0	0	0	0	0	0	0	0	0	0	0	0	0	0	0	0	0	0	0	0	0	0	0	0	0	0	0	0	0	0	0
11		1	1	1	1	1	1	1	1	0	1	1	1	1	1	1	1	1	1	1	1	1	1	1	1	1	1	1	1	1	0	0	0	1	1	1	1	1	1	1	1	1	1	1	1	1	1	1	1
12		0	1	1	1	1	1	1	1	0	1	1	1	1	1	1	1	1	1	1	1	1	1	1	1	1	1	1	1	1	0	0	0	0	1	1	1	1	1	1	1	1	1	1	1	1	1	1	1
13		0	1	1	1	1	1	1	1	0	1	1	1	1	1	1	1	1	1	1	1	1	1	1	1	1	1	1	1	1	0	0	0	1	1	1	1	1	1	1	1	1	1	1	1	1	1	1	1
14		1	1	1	1	1	1	1	1	0	1	1	1	1	1	1	1	1	1	1	1	1	1	1	1	1	1	1	1	1	0	0	0	0	1	1	1	1	1	1	1	1	1	1	1	1	1	1	1
[truncated: 16 more columns]

## Sheet: 300 Hz
Qualitative reports
	Electrode #	1	2	3	4	5	6	7	8	9	10	11	12	13	14	15	16	17	18	19	20	21	22	23	24	25	26	27	28	29	30	31	32	33	34	35	36	37	38	39	40	41	42	43	44	45	46	47	48
Survey #
1		[]	[]	[]	[]	[]	[]	[]	[]	[]	[]	[]	' tingle'	[]	[]	' tingle'	[]	' tingle'	[]	' tingle warm sharp vibration buzz'	[]	[]	' warm buzz'	[]	[]	[]	[]	[]	' tingle warm'	[]	[]	[]	[]	[]	[]	[]	' tingle'	[]	[]	[]	[]	' tingle'	[]	[]	' tingle'	[]	[]	[]	[]
2		[]	[]	[]	[]	[]	[]	[]	[]	[]	[]	[]	[]	[]	[]	[]	[]	[]	[]	' tingle pressure warm sharp'	[]	[]	[]	[]	[]	[]	[]	[]	[]	[]	[]	[]	[]	[]	[]	[]	' tingle'	[]	[]	[]	[]	[]	[]	[]	[]	[]	[]	[]	[]
3		[]	[]	[]	[]	[]	[]	[]	[]	[]	' tingle pressure tapping'	[]	' pressure tapping'	[]	[]	[]	' pressure warm sharp vibration buzz'	[]	[]	' tingle warm sharp'	[]	[]	[]	[]	[]	' pressure sharp vibration'	[]	[]	[]	[]	[]	[]	[]	[]	[]	[]	[]	[]	[]	[]	[]	[]	[]	[]	[]	[]	[]	[]	[]
4		[]	' tingle'	' tingle pressure poke'	' tingle pressure sharp vibration buzz'	' tingle pressure'	' pressure'	[]	' tingle'	[]	' tingle pressure'	[]	' tingle pressure'	[]	' tingle'	' tingle'	' tingle pressure warm sharp vibration buzz'	' tingle'	' tingle warm'	' tingle pressure warm'	' tingle warm'	' tingle'	' pressure warm sharp vibration buzz'	' tingle pressure warm'	' tingle'	' tingle pressure sharp vibration buzz'	' tingle buzz'	' tingle warm'	' tingle pressure warm'	' tingle pressure warm'	[]	[]	[]	[]	' tingle warm'	[]	' tingle pressure touch poke'	' tingle'	' tingle'	' tingle'	' tingle'	[]	' tingle'	[]	' tingle pressure warm'	[]	' tingle warm'	' tingle warm'	' tingle'
Stimulated or not (1 or 0)
	Electrode #	1	2	3	4	5	6	7	8	9	10	11	12	13	14	15	16	17	18	19	20	21	22	23	24	25	26	27	28	29	30	31	32	33	34	35	36	37	38	39	40	41	42	43	44	45	46	47	48
Survey #
1		0	1	0	0	0	0	0	0	0	1	0	1	0	0	1	0	1	0	1	0	0	1	0	0	0	0	0	1	0	0	0	0	0	0	0	1	0	0	0	0	1	0	0	1	0	0	0	1
2		0	0	0	0	0	0	0	0	0	0	0	0	0	0	0	0	0	0	1	0	0	0	0	0	0	0	0	0	0	0	0	0	0	0	0	1	0	0	0	0	0	0	0	0	0	0	0	0
3		0	0	0	0	0	0	0	1	0	1	0	1	0	0	0	1	0	0	1	0	0	0	0	0	1	0	0	0	0	0	0	0	0	0	0	1	0	0	0	1	0	0	0	0	0	0	0	0
4		0	1	1	1	1	1	1	1	0	1	1	1	1	1	1	1	1	1	1	1	1	1	1	1	1	1	1	1	1	0	0	0	0	1	1	1	1	1	1	1	1	1	1	1	1	1	1	1
[truncated: 16 more columns]
