# Supplementary material for: Perception of microstimulation frequency in human somatosensory cortex
Source: eLife. 2021 Jul 27;10:e65128. doi: 10.7554/eLife.65128 (PMC8376245; doi:10.7554/eLife.65128)
Supplement: Figure 3—figure supplement 2—source data 1. [file elife-65128-fig3-figsupp2-data1.xlsx]

## Sheet: Sheet1
Electrode #	Median Intensity at 20 Hz	Median Intensity at 100 Hz	Median Intensity at 300 Hz	Cluster #
2	1.75	1.44444	1.02778	3
3	0.265279	0.651389	0.711111	1
8	0.041675	0.583333	0.541668	1
12	1.50417	1.3125	1.14028	3
13	1e-05	0.0750017	0.183333	1
14	1.9375	2.33333	2	2
16	1.125	1.79167	1.75	2
19	1.45833	2.175	1.93167	2
20	0.216667	0.6	0.583335	3
22	0.94	1.60667	1.465	2
26	1.16667	1.875	2.08333	2
34	0.06667	0.141667	0.2	1
36	0.0944506	0.497222	0.875	1
41	1e-05	0.283333	0.433333	1
42	1.375	0.75	0.258337	1
45	0.016675	0.108335	0.325	1
49	1.75	1.25	0.916667	3
54	2.29167	1.91667	1.75	3
58	2	2.29167	1.95833	3
63	1.26389	1.11944	1.125	3
