# Supplementary material for: Perception of microstimulation frequency in human somatosensory cortex
Source: eLife. 2021 Jul 27;10:e65128. doi: 10.7554/eLife.65128 (PMC8376245; doi:10.7554/eLife.65128)
Supplement: Figure 3—source data 1. — It also contains the number of times an electrode was stimulated in each group. Each sheet has data for a different stimulus frequency. [file elife-65128-fig3-data1.xlsx]

## Sheet: 20 Hz
Quality Count
	Tingle	Pressure	Warm	Sharp	Vibration	Buzzing	Tapping	Sparkle	Touch	Prick
LFP	5	18	1	1	0	0	9	11	9	2
IFP	12	18	4	7	1	3	15	6	10	1
HFP	2	2	1	0	0	0	1	0	0	0
# of times an electrode was stimulated
LFP	18
IFP	24
HFP	22

## Sheet: 100 Hz
Quality Count
	Tingle	Pressure	Warm	Sharp	Vibration	Buzzing	Tapping	Sparkle	Touch	Prick
LFP	53	26	19	3	2	3	1	0	0	0
IFP	57	41	51	43	23	41	0	0	0	0
HFP	65	35	7	2	1	1	1	0	6	23
# of times an electrode was stimulated
LFP	57
IFP	81
HFP	86

## Sheet: 300 Hz
Quality Count
	Tingle	Pressure	Warm	Sharp	Vibration	Buzzing	Tapping	Sparkle	Touch	Prick
LFP	7	3	2	0	0	0	1	0	0	0
IFP	13	7	12	6	4	6	0	0	0	0
HFP	8	2	2	0	0	0	0	0	1	2
# of times an electrode was stimulated
LFP	11
IFP	16
HFP	13
