# Supplementary material for: Perception of microstimulation frequency in human somatosensory cortex
Source: eLife. 2021 Jul 27;10:e65128. doi: 10.7554/eLife.65128 (PMC8376245; doi:10.7554/eLife.65128)
Supplement: Figure 4—figure supplement 1—source data 1. — ‘Nan’ values represent unwired electrodes. [file elife-65128-fig4-figsupp1-data1.xlsx]

## Sheet: Sheet1
LFP electrode #s	33	34	40	44	45	46	47
HFP electrodes #s	1	2	3	5	8	10	12	13	14	19	20	26	35	42	57
Spatial electrode #s
Lateral array
	1	NaN	8	NaN	21	27
	NaN	13	NaN	17	NaN	28
	3	NaN	10	NaN	23	NaN
	NaN	15	NaN	18	NaN	30
	5	NaN	12	NaN	24	NaN
	NaN	2	NaN	20	NaN	29
	7	NaN	14	NaN	25	NaN
	NaN	4	NaN	19	NaN	32
	9	NaN	16	NaN	26	NaN
	11	6	NaN	22	NaN	31
Medial array
	33	NaN	40	NaN	53	59
	NaN	45	NaN	49	NaN	60
	35	NaN	42	NaN	55	NaN
	NaN	47	NaN	50	NaN	62
	37	NaN	44	NaN	56	NaN
	NaN	34	NaN	52	NaN	61
	39	NaN	46	NaN	57	NaN
	NaN	36	NaN	51	NaN	64
	41	NaN	48	NaN	58	NaN
	43	38	NaN	54	NaN	63
