# Supplementary material for: Perception of microstimulation frequency in human somatosensory cortex
Source: eLife journal article supplement (doi:10.7554/elife.65128), 2021-07-27
Supplement: supp [file elife-65128-supp-v1.zip]

|                                            |           | % of reports that contained descriptors |        |        |
|--------------------------------------------|-----------|-----------------------------------------|--------|--------|
| Descriptors                                |           | 20 Hz                                   | 100 Hz | 300 Hz |
| Descriptors<br>included from the<br>start  | Tingle    | 26                                      | 67     | 72     |
|                                            | Pressure  | 50                                      | 35     | 31     |
|                                            | Warm      | 7                                       | 31     | 31     |
|                                            | Sharp     | 7                                       | 12     | 11     |
|                                            | Vibration | 1                                       | 5      | 8      |
|                                            | Touch     | 26                                      | 1      | 1      |
| Descriptors<br>developed by<br>participant | Buzzing   | 2                                       | 9      | 9      |
|                                            | Tapping   | 32                                      | 1      | 2      |
|                                            | Sparkle   | 16                                      | 0      | 0      |
|                                            | Prick     | 3                                       | 4      | 2      |
