# Supplementary figures and images for: Perception of microstimulation frequency in human somatosensory cortex
Source: eLife journal article supplement (doi:10.7554/elife.65128), 2021-07-27

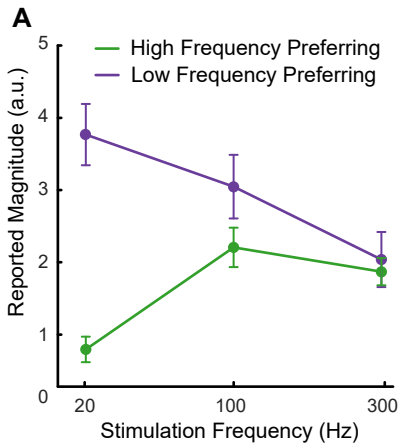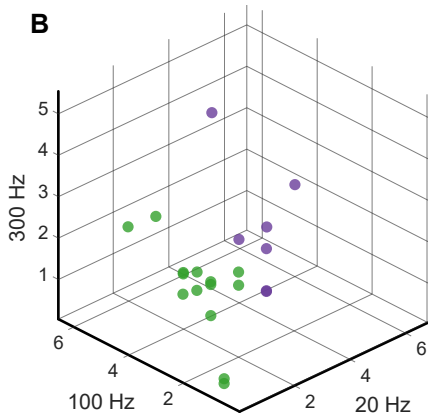

Supplement: supp [file elife-65128-supp-v1.zip]

Lateral Array

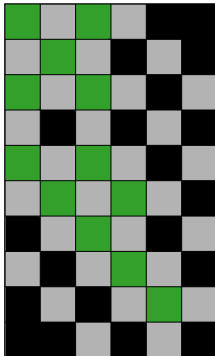

Medial Array

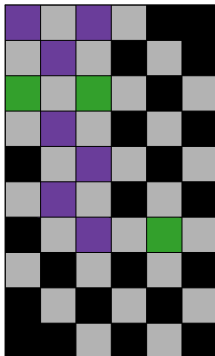

Supplement: supp [file elife-65128-supp-v1.zip]
